# Supplementary material for: Integrated multiomics analysis of chromosome 19 miRNA cluster in bladder cancer
Source: Funct Integr Genomics. 2023 Aug 5;23(3):266. doi: 10.1007/s10142-023-01191-0 (PMC10404189; doi:10.1007/s10142-023-01191-0)
Supplement: Supplementary file 2 — (XLSX 305 kb) [file 10142_2023_1191_MOESM2_ESM.xlsx]

## Sheet: Supplemetray Tables
Integrated Multi-Omics Analysis of Chromosome 19 miRNA Cluster in Bladder Cancer
Akshay Pramod Ware1, Kapaettu Satyamoorthy2, and Bobby Paul1*
1Department of Bioinformatics, Manipal School of Life Sciences, Manipal Academy of Higher Education, Manipal – 576104, Karnataka, India. 2Department of Cell and Molecular Biology, Manipal School of Life Sciences, Manipal Academy of Higher Education, Manipal – 576104, Karnataka, India.
*Corrospondance to: bobby.paul@manipal.edu

## Sheet: S1 Table
Supplementary Table S1. Differentially expressed miRNAs in BCa compared with Normal.
miRNAs	logFC	logCPM	LR	PValue	FDR
hsa-mir-1912	-4.36063	-1.12041	53.3995	2.72168e-13	8.90558e-12
hsa-mir-1298	-4.11984	-0.347717	75.9428	2.92002e-18	5.86925e-16
hsa-mir-133b	-2.6396	2.77176	50.1256	1.44214e-12	4.22728e-11
hsa-mir-1-2	-2.52928	4.90041	68.8515	1.06161e-16	9.95795e-15
hsa-mir-1-1	-2.49028	4.83457	65.1296	7.01321e-16	4.29026e-14
hsa-mir-133a-1	-2.44829	4.4162	62.1086	3.25034e-15	1.75893e-13
hsa-mir-133a-2	-2.40846	4.27534	60.7235	6.56821e-15	2.98112e-13
hsa-mir-143	-2.12849	17.2337	81.6203	1.64911e-19	4.6406e-17
hsa-mir-383	-2.11629	2.26758	13.5243	0.00023549	0.00076169
hsa-mir-1258	-2.07012	-0.364464	24.1497	8.913e-07	5.57359e-06
hsa-mir-576	2.0005	3.74299	57.0544	4.23915e-14	1.70414e-12
hsa-mir-4742	2.00667	0.327778	30.3896	3.53418e-08	3.40588e-07
hsa-mir-4784	2.00867	-0.443519	9.27021	0.00232911	0.00599097
hsa-mir-4777	2.00922	-0.579092	17.0628	3.61638e-05	0.000140172
hsa-mir-6735	2.01425	-0.781427	14.6831	0.000127184	0.000437524
hsa-mir-200c	2.01744	14.0651	27.6482	1.4551e-07	1.18342e-06
hsa-mir-6748	2.02017	-0.830313	14.3072	0.000155269	0.000521394
hsa-mir-6764	2.02131	-0.693769	18.1538	2.03757e-05	8.53233e-05
hsa-mir-550a-2	2.02285	1.56444	35.3134	2.80691e-09	3.40459e-08
hsa-mir-3943	2.02848	-1.05695	12.8371	0.000339814	0.00106485
hsa-mir-5684	2.02988	0.313932	19.1748	1.19275e-05	5.31076e-05
hsa-mir-643	2.03371	0.285781	29.9511	4.43087e-08	4.21232e-07
hsa-mir-1908	2.04033	-1.11057	14.0941	0.000173888	0.000578395
hsa-mir-6807	2.0437	-0.652639	15.6332	7.68906e-05	0.000278111
hsa-mir-548v	2.04668	0.339936	18.5688	1.63883e-05	7.13879e-05
hsa-mir-3174	2.04709	-0.719558	18.7189	1.51473e-05	6.66007e-05
hsa-mir-5582	2.05181	-0.945635	13.1264	0.00029116	0.000924745
hsa-mir-106b	2.05505	9.78913	61.2625	4.99507e-15	2.34269e-13
hsa-mir-450a-2	2.05715	2.7354	41.958	9.32571e-11	1.7495e-09
hsa-mir-1304	2.05783	1.48623	13.5741	0.000229333	0.000744035
hsa-mir-2278	2.06457	-1.11065	16.0662	6.11674e-05	0.00022648
hsa-mir-323a	2.0677	3.26046	11.6936	0.000627147	0.00189355
hsa-mir-942	2.08028	3.40865	41.5473	1.15056e-10	2.10238e-09
hsa-mir-296	2.08295	3.04966	15.673	7.52932e-05	0.000273035
hsa-mir-6818	2.09375	-0.740726	18.4041	1.78671e-05	7.66434e-05
hsa-mir-4676	2.09748	-0.173347	27.5446	1.5351e-07	1.23187e-06
hsa-mir-6885	2.10317	-0.946341	16.1816	5.75516e-05	0.000213655
hsa-mir-3187	2.1035	-0.0172255	14.8162	0.000118516	0.000411734
hsa-mir-363	2.10472	4.43377	18.619	1.59619e-05	6.97466e-05
hsa-mir-642a	2.10798	1.2245	21.6356	3.29673e-06	1.68673e-05
hsa-mir-19b-1	2.11005	6.88267	57.2088	3.91922e-14	1.67101e-12
hsa-mir-191	2.11269	9.81265	49.5327	1.95095e-12	5.602e-11
hsa-mir-3922	2.1137	0.434865	23.3063	1.38147e-06	7.99628e-06
hsa-mir-548d-2	2.11743	-0.847775	15.5146	8.18695e-05	0.000294605
hsa-mir-185	2.1297	6.73945	71.898	2.26612e-17	2.65703e-15
hsa-mir-4754	2.13681	-0.787286	17.703	2.58222e-05	0.000104703
hsa-mir-3929	2.14206	-1.11137	9.03756	0.00264489	0.00674159
hsa-mir-19b-2	2.14348	6.74715	57.5604	3.27765e-14	1.44114e-12
hsa-mir-9-3	2.15347	9.41007	14.0313	0.000179797	0.000596637
hsa-mir-6773	2.15939	-0.837815	12.3966	0.000430123	0.00133594
hsa-mir-3198-2	2.16135	-1.09162	15.3694	8.84063e-05	0.000315705
hsa-mir-5706	2.16214	-0.582783	20.465	6.07317e-06	2.86743e-05
hsa-mir-1284	2.16261	-0.315616	25.2615	5.00613e-07	3.32247e-06
hsa-mir-1306	2.16356	3.65124	41.8391	9.91006e-11	1.83467e-09
hsa-mir-9-1	2.16419	9.40805	14.1458	0.000169176	0.000564053
hsa-mir-9-2	2.16457	9.40828	14.1697	0.000167042	0.000558263
hsa-mir-639	2.16794	-0.0957893	22.2259	2.4238e-06	1.28206e-05
hsa-mir-454	2.17809	3.67319	68.0127	1.62444e-16	1.38087e-14
hsa-mir-1292	2.17855	0.209118	31.2251	2.29771e-08	2.26075e-07
hsa-mir-3662	2.18155	0.0357866	14.4699	0.000142416	0.000482842
hsa-mir-6850	2.18993	-1.08774	13.6321	0.000222347	0.000724171
hsa-mir-1256	2.19142	-1.0958	19.1502	1.20825e-05	5.36282e-05
hsa-mir-3911	2.19882	-1.08246	15.1874	9.73501e-05	0.000344532
hsa-mir-6891	2.20064	-0.572729	11.591	0.000662725	0.00199242
hsa-mir-450a-1	2.20601	2.72882	48.5513	3.21761e-12	8.61373e-11
hsa-mir-1343	2.21134	0.408272	22.4369	2.17166e-06	1.1752e-05
hsa-mir-6742	2.21522	-1.07566	21.6841	3.21448e-06	1.65065e-05
hsa-mir-21	2.21628	18.1617	124.338	7.10616e-29	9.99837e-26
hsa-mir-548k	2.21701	-0.675024	20.6364	5.55316e-06	2.64857e-05
hsa-mir-3178	2.24114	-1.0888	18.3931	1.79707e-05	7.68534e-05
hsa-mir-545	2.24484	-0.00849505	28.4588	9.57124e-08	8.21142e-07
hsa-mir-3616	2.24565	-0.872257	9.81037	0.0017353	0.00461545
hsa-mir-4473	2.24633	-0.239395	15.0384	0.000105343	0.000369621
hsa-mir-6820	2.25395	-0.314865	27.2495	1.7882e-07	1.41348e-06
hsa-mir-1914	2.25512	-0.867639	14.7552	0.00012241	0.000424214
hsa-mir-4728	2.25949	2.03837	16.2862	5.44583e-05	0.000204328
hsa-mir-3613	2.2626	4.04331	67.7701	1.83718e-16	1.43607e-14
hsa-mir-1227	2.26522	-0.905407	14.6313	0.000130724	0.000448607
hsa-mir-3652	2.26764	0.296736	23.3218	1.37035e-06	7.98128e-06
hsa-mir-1254-1	2.27591	-0.0721139	23.5985	1.18681e-06	7.13605e-06
hsa-mir-331	2.27612	5.00262	55.5567	9.08009e-14	3.36202e-12
hsa-mir-4797	2.27758	-0.222356	23.5819	1.19709e-06	7.16728e-06
hsa-mir-658	2.28354	-0.636233	17.3427	3.12096e-05	0.000123348
hsa-mir-6870	2.28939	-1.06128	17.4923	2.88479e-05	0.000115062
hsa-mir-1180	2.30079	4.65388	36.667	1.40131e-09	1.80885e-08
hsa-mir-3614	2.3058	3.12439	26.7562	2.30813e-07	1.75543e-06
hsa-mir-4802	2.30643	-0.622149	21.3081	3.91071e-06	1.9443e-05
hsa-mir-3143	2.30726	-0.956971	21.4783	3.57858e-06	1.81771e-05
hsa-mir-3138	2.31922	-0.873779	17.7053	2.57902e-05	0.000104703
hsa-mir-200b	2.32193	10.7064	27.3153	1.72837e-07	1.3739e-06
hsa-mir-548au	2.32422	-0.521344	22.7983	1.79926e-06	9.9277e-06
hsa-mir-193b	2.33231	7.47805	44.6013	2.41537e-11	5.31003e-10
hsa-mir-4461	2.33278	0.769777	19.9979	7.75281e-06	3.58822e-05
hsa-mir-653	2.33947	3.12823	24.8102	6.32612e-07	4.08296e-06
hsa-mir-3691	2.3488	-0.169234	23.5537	1.21473e-06	7.24206e-06
hsa-mir-4691	2.35403	-0.617798	14.5799	0.000134341	0.000459898
hsa-mir-1276	2.35895	-0.578375	19.9729	7.85479e-06	3.61166e-05
hsa-mir-339	2.3641	6.40072	34.153	5.09455e-09	5.68892e-08
hsa-mir-34c	2.36735	3.97946	29.2876	6.23931e-08	5.70046e-07
hsa-mir-597	2.3697	-1.04056	19.249	1.1473e-05	5.15735e-05
hsa-mir-549a	2.39008	-0.533254	16.2261	5.62131e-05	0.000209793
hsa-mir-8072	2.39031	-0.84509	21.2406	4.05083e-06	2.00687e-05
hsa-mir-4707	2.39429	-0.427036	20.1246	7.25593e-06	3.36934e-05
hsa-mir-7854	2.39695	0.063395	33.5046	7.10967e-09	7.65857e-08
hsa-mir-1226	2.40135	1.5738	29.2648	6.31309e-08	5.73066e-07
hsa-mir-559	2.40362	-1.04547	17.0747	3.5938e-05	0.000139682
hsa-mir-324	2.40648	6.30266	48.6966	2.98791e-12	8.24311e-11
hsa-mir-939	2.40743	0.667343	39.3038	3.62727e-10	5.67064e-09
hsa-mir-3934	2.4092	1.92194	43.5322	4.17032e-11	8.75768e-10
hsa-mir-17	2.41296	10.2766	72.957	1.32504e-17	2.14178e-15
hsa-mir-7706	2.41384	1.95683	40.8615	1.63408e-10	2.83846e-09
hsa-mir-551a	2.41966	-0.352667	11.4004	0.000734282	0.00217045
hsa-mir-6868	2.42102	-0.167789	18.2196	1.96838e-05	8.34192e-05
hsa-mir-651	2.42594	2.27834	49.3014	2.19504e-12	6.17686e-11
hsa-mir-4479	2.42906	-0.858235	18.5334	1.66953e-05	7.25007e-05
hsa-mir-3074	2.44157	2.88765	25.6471	4.09916e-07	2.91487e-06
hsa-mir-196a-2	2.45066	5.15178	17.491	2.88677e-05	0.000115062
hsa-mir-217	2.4567	6.04598	12.8436	0.000338631	0.00106351
hsa-mir-1291	2.45973	0.00213627	25.4553	4.52749e-07	3.04793e-06
hsa-mir-550a-1	2.46367	1.5745	45.5909	1.45715e-11	3.59685e-10
hsa-mir-18b	2.4697	0.698956	20.2078	6.94692e-06	3.23653e-05
hsa-mir-3618	2.47378	-0.83507	20.3429	6.47341e-06	3.03603e-05
hsa-mir-1295a	2.48303	0.20332	15.7637	7.17666e-05	0.000262274
hsa-mir-590	2.48515	4.75911	69.0301	9.69726e-17	9.74575e-15
hsa-mir-1301	2.48815	3.85871	51.986	5.58984e-13	1.70976e-11
hsa-mir-194-1	2.49631	7.35738	24.5279	7.32402e-07	4.64654e-06
hsa-mir-616	2.50141	1.38871	40.2017	2.29052e-10	3.79148e-09
hsa-mir-3194	2.50265	-0.543344	21.7445	3.11475e-06	1.6053e-05
hsa-mir-641	2.50502	-0.574455	22.4643	2.14084e-06	1.163e-05
hsa-mir-4778	2.50544	0.0934381	11.1317	0.000848641	0.00248241
hsa-mir-187	2.51736	7.25646	16.949	3.83985e-05	0.000147212
hsa-mir-760	2.52738	1.51459	25.6115	4.17548e-07	2.93745e-06
hsa-mir-3619	2.52875	-0.499898	19.6254	9.42095e-06	4.2759e-05
hsa-mir-6858	2.5409	-0.996882	21.8693	2.91859e-06	1.50973e-05
hsa-mir-6781	2.54513	-0.447931	25.744	3.89834e-07	2.84195e-06
hsa-mir-7-2	2.54935	0.844532	23.2942	1.39015e-06	7.99628e-06
hsa-mir-194-2	2.54955	7.54608	25.6458	4.10195e-07	2.91487e-06
hsa-mir-944	2.55589	6.41352	21.8843	2.89598e-06	1.50913e-05
hsa-mir-6797	2.5588	-0.693814	22.6885	1.90507e-06	1.04705e-05
hsa-mir-455	2.56022	7.8306	44.8635	2.11259e-11	4.82174e-10
hsa-mir-1307	2.56776	11.1239	72.8891	1.37144e-17	2.14178e-15
hsa-mir-508	2.57104	4.7332	10.7295	0.00105442	0.00297905
hsa-mir-6793	2.58594	-0.453956	27.0717	1.9605e-07	1.52399e-06
hsa-mir-4745	2.58869	-0.51247	15.7417	7.26042e-05	0.000263964
hsa-mir-4746	2.61235	2.59152	44.8523	2.12472e-11	4.82174e-10
hsa-mir-425	2.61642	8.91435	61.4125	4.62854e-15	2.24564e-13
hsa-mir-5699	2.61763	0.704206	34.6128	4.02261e-09	4.67753e-08
hsa-mir-3654	2.62442	-0.880972	16.0502	6.16849e-05	0.000227797
hsa-mir-20a	2.6293	9.07144	64.2603	1.09018e-15	6.39118e-14
hsa-mir-205	2.65024	13.3565	28.1608	1.11644e-07	9.35022e-07
hsa-mir-106a	2.65279	4.36791	37.6171	8.6088e-10	1.19927e-08
hsa-mir-93	2.6532	13.3239	66.2697	3.93258e-16	2.63483e-14
hsa-mir-708	2.65586	7.38709	40.4052	2.06391e-10	3.4987e-09
hsa-mir-4687	2.6607	-0.551844	23.809	1.06384e-06	6.45182e-06
hsa-mir-149	2.68752	7.72461	38.0422	6.92301e-10	1.00419e-08
hsa-mir-3913-1	2.6903	2.00146	35.8523	2.12858e-09	2.65418e-08
hsa-mir-216a	2.69583	1.03185	10.0105	0.0015565	0.00420343
hsa-mir-671	2.70773	3.59227	90.9302	1.48834e-21	1.04705e-18
hsa-mir-34b	2.71307	1.67467	29.5354	5.49036e-08	5.08219e-07
hsa-mir-6499	2.71852	2.0573	13.7775	0.000205783	0.000673341
hsa-mir-3117	2.72313	0.190289	25.4656	4.50351e-07	3.04793e-06
hsa-mir-200a	2.72378	10.8318	35.8495	2.13164e-09	2.65418e-08
hsa-mir-1915	2.72541	-0.839463	15.3621	8.87515e-05	0.000316135
hsa-mir-196a-1	2.72711	5.00258	20.2362	6.84442e-06	3.19937e-05
hsa-mir-3065	2.73295	5.71989	33.9299	5.71327e-09	6.32958e-08
hsa-mir-4640	2.73731	-0.325674	29.1412	6.72903e-08	6.03041e-07
hsa-mir-570	2.73947	0.429332	33.4989	7.13058e-09	7.65857e-08
hsa-mir-188	2.74066	2.42081	51.333	7.7956e-13	2.33371e-11
hsa-mir-4766	2.7557	-0.187151	24.8955	6.05249e-07	3.94253e-06
hsa-mir-2277	2.76458	0.494627	38.9792	4.28351e-10	6.62297e-09
hsa-mir-6754	2.77777	-0.915242	25.9369	3.52754e-07	2.58503e-06
hsa-mir-612	2.77872	-0.828656	10.7087	0.00106632	0.00300663
hsa-mir-7-3	2.80257	0.832941	23.0558	1.57368e-06	8.92812e-06
hsa-mir-5579	2.80404	-0.219602	14.3628	0.000150755	0.000508661
hsa-mir-19a	2.80408	5.55572	66.8063	2.99533e-16	2.10721e-14
hsa-mir-636	2.8055	-0.245064	32.1677	1.4142e-08	1.47391e-07
hsa-mir-1254-2	2.80599	0.0154617	34.2181	4.9268e-09	5.59033e-08
hsa-mir-3170	2.82326	0.824708	32.6738	1.08997e-08	1.14447e-07
hsa-mir-323b	2.8281	2.26553	25.4804	4.46895e-07	3.04793e-06
hsa-mir-182	2.83006	14.6162	52.7984	3.69593e-13	1.18186e-11
hsa-mir-548d-1	2.85137	-0.780292	25.6894	4.01016e-07	2.87872e-06
hsa-mir-3176	2.8523	-0.471667	22.343	2.28048e-06	1.22467e-05
hsa-mir-20b	2.87366	5.46887	25.473	4.4862e-07	3.04793e-06
hsa-mir-584	2.8738	8.64835	40.4202	2.04817e-10	3.4987e-09
hsa-mir-4763	2.87668	-0.880497	28.4873	9.4315e-08	8.19143e-07
hsa-mir-466	2.88557	-0.135543	12.6451	0.000376553	0.00117475
hsa-mir-4787	2.88644	0.692949	20.7662	5.18895e-06	2.50888e-05
hsa-mir-449a	2.90125	0.673722	13.1824	0.000282594	0.00090161
hsa-mir-6777	2.92208	-0.26128	27.7034	1.41416e-07	1.15682e-06
hsa-mir-4713	2.9223	-0.456284	23.6804	1.13737e-06	6.86814e-06
hsa-mir-4758	2.92447	-0.344412	26.7315	2.33777e-07	1.76841e-06
hsa-mir-573	2.92589	-0.893604	17.6449	2.66231e-05	0.00010672
hsa-mir-449b	2.93125	-0.680121	10.924	0.000949275	0.00273695
hsa-mir-4638	2.93819	-0.129678	37.394	9.65204e-10	1.33141e-08
hsa-mir-6844	2.94874	-0.556341	20.5272	5.879e-06	2.7851e-05
hsa-mir-556	2.95039	0.32407	27.9402	1.25124e-07	1.04172e-06
hsa-mir-3664	2.96689	-0.367978	22.0046	2.71994e-06	1.43332e-05
hsa-mir-3144	2.9687	-0.314572	18.5105	1.68972e-05	7.31519e-05
hsa-mir-509-3	2.97139	1.86587	9.91827	0.00163646	0.00440249
hsa-mir-1270	2.9716	2.03411	26.1034	3.23622e-07	2.38396e-06
hsa-mir-1305	2.99663	-0.702832	14.2093	0.000163557	0.000547917
hsa-mir-935	3.03813	1.5914	12.0604	0.000515049	0.00156856
hsa-mir-4636	3.04366	1.49434	22.9268	1.68292e-06	9.43372e-06
hsa-mir-3660	3.05544	-0.859802	13.9085	0.000191933	0.000630957
hsa-mir-579	3.06801	0.197406	37.1644	1.08578e-09	1.45494e-08
hsa-mir-548f-1	3.06961	0.524876	8.35215	0.00385232	0.00937753
hsa-mir-141	3.09455	11.3413	52.3952	4.53835e-13	1.41899e-11
hsa-mir-301a	3.12574	4.66827	65.3348	6.31962e-16	4.04169e-14
hsa-mir-5092	3.14208	-0.680432	24.1361	8.97616e-07	5.58825e-06
hsa-mir-6814	3.15009	-0.535061	27.8327	1.32271e-07	1.09474e-06
hsa-mir-1277	3.19398	1.08342	54.8051	1.33098e-13	4.68173e-12
hsa-mir-31	3.19677	7.13561	24.526	7.33142e-07	4.64654e-06
hsa-mir-551b	3.2049	3.25651	18.3269	1.86061e-05	7.93297e-05
hsa-mir-513c	3.21986	-0.654843	8.61287	0.00333796	0.00828335
hsa-mir-509-1	3.22521	1.70244	10.6797	0.00108319	0.00304201
hsa-mir-509-2	3.23326	1.7061	11.5239	0.000687078	0.00204813
hsa-mir-1229	3.23758	0.569798	34.6948	3.85658e-09	4.52184e-08
hsa-mir-192	3.24364	9.40285	39.9639	2.58703e-10	4.2325e-09
hsa-mir-877	3.25324	2.44987	56.7834	4.86559e-14	1.90163e-12
hsa-mir-3136	3.26168	0.154978	31.9862	1.55273e-08	1.59467e-07
hsa-mir-137	3.26622	1.47113	9.8391	0.00170841	0.00455253
hsa-mir-224	3.27342	7.34411	31.8004	1.70856e-08	1.72962e-07
hsa-mir-4665	3.29173	-0.493696	28.4136	9.79745e-08	8.35455e-07
hsa-mir-937	3.30381	2.09195	53.4076	2.71041e-13	8.90558e-12
hsa-mir-503	3.32103	3.70392	61.6821	4.03643e-15	2.0283e-13
hsa-mir-429	3.33121	8.63897	42.9814	5.52614e-11	1.12685e-09
hsa-mir-138-2	3.33525	1.67196	23.9455	9.91039e-07	6.06258e-06
hsa-mir-130b	3.35889	6.09088	71.9505	2.20669e-17	2.65703e-15
hsa-mir-138-1	3.3879	2.17218	23.8469	1.0431e-06	6.35345e-06
hsa-mir-33a	3.40434	5.21805	61.6994	4.00112e-15	2.0283e-13
hsa-mir-6715a	3.41062	0.499653	8.87489	0.0028912	0.00731639
hsa-mir-489	3.4399	-0.574885	24.5149	7.37383e-07	4.65246e-06
hsa-mir-4756	3.44255	-0.711234	22.5036	2.09755e-06	1.14835e-05
hsa-mir-940	3.44439	3.04481	53.6095	2.44572e-13	8.39299e-12
hsa-mir-335	3.45135	7.60313	41.0975	1.44824e-10	2.54709e-09
hsa-mir-4449	3.47064	0.595482	25.0705	5.52732e-07	3.61718e-06
hsa-mir-6728	3.48377	-0.53759	29.8722	4.61484e-08	4.35661e-07
hsa-mir-203b	3.4925	6.08411	18.4599	1.73515e-05	7.4659e-05
hsa-mir-3189	3.49491	0.0743755	16.4364	5.03097e-05	0.000189774
hsa-mir-18a	3.49784	5.30145	72.6832	1.52223e-17	2.14178e-15
hsa-mir-6783	3.49986	0.0789978	42.1188	8.58919e-11	1.63311e-09
hsa-mir-934	3.55096	6.23905	27.7059	1.41228e-07	1.15682e-06
hsa-mir-3651	3.55597	1.39084	32.9361	9.52385e-09	1.00752e-07
hsa-mir-4501	3.565	0.855763	9.97987	0.00158261	0.00426576
hsa-mir-183	3.57545	13.7964	67.96	1.66843e-16	1.38087e-14
hsa-mir-3200	3.60668	3.05877	35.5324	2.50846e-09	3.06904e-08
hsa-mir-33b	3.6505	2.04881	47.803	4.71282e-12	1.1841e-10
hsa-mir-7112	3.65413	-0.604594	35.7188	2.27954e-09	2.81343e-08
hsa-mir-4652	3.68164	1.83696	32.1332	1.43956e-08	1.48931e-07
hsa-mir-7974	3.76813	-0.182871	30.6392	3.10756e-08	3.01541e-07
hsa-mir-4664	3.79703	0.705309	45.3451	1.65203e-11	4.0076e-10
hsa-mir-3944	3.81468	0.383432	34.4546	4.36303e-09	4.99088e-08
hsa-mir-1910	3.85714	1.02593	37.2157	1.05758e-09	1.43078e-08
hsa-mir-345	3.90577	5.08374	57.0791	4.18636e-14	1.70414e-12
hsa-mir-4523	3.90871	-0.493274	38.2803	6.12774e-10	9.17205e-09
hsa-mir-4446	3.94936	-0.0176056	30.0246	4.26607e-08	4.08324e-07
hsa-mir-548y	4.05064	-0.44146	15.1853	9.74584e-05	0.000344532
hsa-mir-135b	4.09562	4.88437	44.4424	2.61953e-11	5.67027e-10
hsa-mir-1293	4.16204	1.73016	21.9145	2.8507e-06	1.49105e-05
hsa-mir-4724	4.18587	1.3793	39.4365	3.38897e-10	5.4185e-09
hsa-mir-675	4.21463	8.33447	25.5719	4.2621e-07	2.95408e-06
hsa-mir-96	4.29787	5.35443	82.3207	1.15705e-19	4.6406e-17
hsa-mir-7705	4.40954	1.81104	71.1833	3.25527e-17	3.52321e-15
hsa-mir-514b	4.41921	-0.325981	9.90755	0.00164602	0.00441975
hsa-mir-577	4.44372	2.42357	17.0056	3.72692e-05	0.000143665
hsa-mir-615	4.64879	1.40805	33.6566	6.57508e-09	7.22745e-08
hsa-mir-1251	4.70711	1.27748	12.8859	0.000331061	0.00104206
hsa-mir-105-2	4.81072	6.14722	19.8715	8.28265e-06	3.79288e-05
hsa-mir-105-1	4.88996	6.14091	19.8668	8.30281e-06	3.79288e-05
hsa-mir-301b	4.99949	2.52906	67.1949	2.45951e-16	1.82133e-14
hsa-mir-147b	5.07321	1.26703	48.5349	3.24469e-12	8.61373e-11
hsa-mir-3131	5.09773	0.174614	12.3211	0.00044787	0.00138495
hsa-mir-483	5.24739	6.72922	26.2231	3.0416e-07	2.27411e-06
hsa-mir-6715b	5.2498	0.790786	16.7852	4.18581e-05	0.000159174
hsa-mir-215	5.32403	5.13135	28.3797	9.97054e-08	8.45093e-07
hsa-mir-767	5.4431	6.69613	23.2789	1.40125e-06	8.01449e-06
hsa-mir-210	5.55615	10.1312	82.0505	1.32651e-19	4.6406e-17
hsa-mir-521-2	5.80145	0.945144	15.7552	7.20884e-05	0.000262768
hsa-mir-1283-1	6.48331	1.50497	18.1067	2.08862e-05	8.69435e-05
hsa-mir-516b-2	6.76014	2.26354	13.9129	0.000191478	0.000630935
hsa-mir-519e	6.84659	1.5776	13.2549	0.00027187	0.000869368
hsa-mir-372	7.09922	3.77077	17.4108	3.01115e-05	0.00011968
hsa-mir-520e	7.30278	2.42045	14.5086	0.000139519	0.000474161
hsa-mir-498	7.43278	2.67858	15.4462	8.48863e-05	0.000304681
hsa-mir-1283-2	7.44716	2.12398	26.2148	3.05477e-07	2.27411e-06
hsa-mir-515-2	7.4954	3.3654	16.4622	4.96289e-05	0.000187709
hsa-mir-523	7.7706	2.77078	13.3142	0.000263402	0.000846134
hsa-mir-521-1	7.83559	3.00618	17.2565	3.26585e-05	0.00012764
hsa-mir-524	7.87778	2.52289	17.9102	2.31574e-05	9.52702e-05
hsa-mir-519b	7.92036	2.56089	16.962	3.81358e-05	0.000146604
hsa-mir-515-1	8.03356	3.37173	16.3481	5.27086e-05	0.000198291
hsa-mir-520h	8.12388	3.28563	17.6829	2.60961e-05	0.000105509
hsa-mir-516b-1	8.16958	4.0134	15.9683	6.44113e-05	0.000236623
hsa-mir-519d	8.18588	4.18864	17.7678	2.49566e-05	0.000102075
hsa-mir-527	8.19275	4.23328	19.9757	7.84341e-06	3.61166e-05
hsa-mir-516a-1	8.21656	5.70319	30.9036	2.71173e-08	2.64959e-07
hsa-mir-518a-1	8.27759	4.24615	17.6627	2.63748e-05	0.00010633
hsa-mir-517b	8.2797	5.47718	20.8393	4.9947e-06	2.42329e-05
hsa-mir-517a	8.29302	5.4904	20.9382	4.74331e-06	2.32538e-05
hsa-mir-517c	8.36452	3.28769	17.6495	2.65582e-05	0.00010672
hsa-mir-518e	8.39665	5.10729	20.9095	4.81502e-06	2.3442e-05
hsa-mir-512-1	8.52986	5.39637	26.1408	3.17401e-07	2.35044e-06
hsa-mir-522	8.56147	5.03769	28.7112	8.40169e-08	7.34235e-07
hsa-mir-519c	8.56664	3.17915	21.1546	4.23679e-06	2.08432e-05
hsa-mir-520d	8.74982	4.00199	18.2532	1.93405e-05	8.22117e-05
hsa-mir-520g	8.85883	4.21416	21.2133	4.10913e-06	2.02861e-05
hsa-mir-519a-2	8.86761	5.67716	31.8002	1.70872e-08	1.72962e-07
hsa-mir-1323	8.94767	3.85539	22.248	2.39611e-06	1.2722e-05
hsa-mir-525	8.96509	5.41391	23.26	1.41514e-06	8.06114e-06
hsa-mir-526b	9.01451	6.41563	28.713	8.39376e-08	7.34235e-07
hsa-mir-520c	9.04773	3.93147	20.3442	6.46877e-06	3.03603e-05
hsa-mir-518b	9.05132	5.71366	25.4955	4.43416e-07	3.04793e-06
hsa-mir-518c	9.09534	5.32378	25.4625	4.51055e-07	3.04793e-06
hsa-mir-518a-2	9.20927	4.43152	22.881	1.72346e-06	9.54689e-06
hsa-mir-520f	9.27383	5.02326	23.5321	1.22846e-06	7.26475e-06
hsa-mir-520b	9.3176	5.07759	28.7334	8.30602e-08	7.34235e-07
hsa-mir-512-2	9.47575	5.40305	31.3057	2.20432e-08	2.18414e-07
hsa-mir-520a	9.62931	6.22027	28.4612	9.55946e-08	8.21142e-07
hsa-mir-516a-2	9.64846	5.52197	39.3836	3.48206e-10	5.50479e-09
hsa-mir-518f	10.0387	5.19123	25.6961	3.99632e-07	2.87872e-06
hsa-mir-519a-1	10.3054	6.15715	41.1049	1.44275e-10	2.54709e-09

## Sheet: S2 Table
Supplementary Table S2. Differentially expressed genes in BCa compared with Normal.
Gene	Ensembl ID	logFC	logCPM	LR	PValue	FDR	start_position	end_position
2003-09-01	ENSG00000100167	-2.48686	3.19158	19.6836	9.14e-06	4.54e-05	41969475	41998221
2004-03-01	ENSG00000144583	-5.82582	0.893786	34.0214	5.45e-09	5.24e-08	216257865	216372483
2010-03-01	ENSG00000173838	-3.08464	-0.401317	34.5341	4.19e-09	4.11e-08	62701314	62808344
A1CF	ENSG00000148584	-5.12668	0.310369	17.8503	2.39e-05	0.000107052	50799409	50885675
AACSP1	ENSG00000250420	-3.28819	-0.539611	8.95818	0.00276229	0.00681881	178764861	178818435
AARD	ENSG00000205002	4.24886	0.347149	106.224	6.59e-25	3.57e-23	116938207	116944487
AATBC	ENSG00000215458	-2.37395	4.54053	18.8414	1.42e-05	6.76e-05	43805758	43812567
ABCA4	ENSG00000198691	-3.1807	3.43618	17.1953	3.37e-05	0.000144484	93992834	94121148
ABCA8	ENSG00000141338	3.17678	3.0773	108.908	1.7e-25	9.62e-24	68867289	68955392
ABCC9	ENSG00000069431	2.21679	2.6599	74.179	7.13e-18	2.17e-16	21797401	21942529
ABCD2	ENSG00000173208	2.32623	0.212775	54.4892	1.56e-13	2.87e-12	39550033	39619803
ABI3BP	ENSG00000154175	2.94706	4.63044	115.044	7.7e-27	4.83e-25	100749156	100993515
AC005515.1	ENSG00000226025	-3.67269	0.428598	10.3196	0.00131625	0.00357642	39679374	39686373
AC011453.1	ENSG00000269842	-4.50582	-0.582964	19.9555	7.93e-06	4.01e-05	53761961	53764199
AC018781.1	ENSG00000248599	-3.02189	-1.24115	11.3188	0.000767244	0.00223273	101034868	101076407
AC023794.1	ENSG00000248265	-2.63261	-0.652279	24.394	7.85e-07	4.95e-06	54058254	54122235
ACACB	ENSG00000076555	2.76479	4.01583	199.727	2.4e-45	6.03e-43	109116595	109268226
ACKR1	ENSG00000213088	3.05323	4.36094	70.3439	4.98e-17	1.36e-15	159203307	159206500
ACKR2	ENSG00000144648	-2.65747	3.8405	16.3283	5.33e-05	0.000216491	42804752	42887974
ACOX2	ENSG00000168306	2.52444	1.43189	85.3946	2.44e-20	9.52e-19	58505136	58537283
ACP7	ENSG00000183760	-2.08632	1.46397	8.97529	0.00273655	0.0067591	39083913	39111493
ACSM5	ENSG00000183549	2.12755	-1.53113	34.8916	3.49e-09	3.48e-08	20409534	20441336
ACTA1	ENSG00000143632	2.85745	0.308213	113.112	2.04e-26	1.23e-24	229431245	229434098
ACTA2	ENSG00000107796	2.33682	8.69569	60.4504	7.55e-15	1.62e-13	88935074	88991339
ACTA2-AS1	ENSG00000180139	2.88403	1.34282	104.636	1.47e-24	7.76e-23	88932390	88940820
ACTBL2	ENSG00000169067	-4.97979	-1.28051	14.021	0.000180782	0.000632568	57480018	57482811
ACTC1	ENSG00000159251	4.46818	6.05179	88.6384	4.74e-21	1.96e-19	34790230	34795549
ACTG2	ENSG00000163017	3.35572	8.34964	86.9043	1.14e-20	4.58e-19	73892314	73919865
ACTL8	ENSG00000117148	-3.76549	0.189002	9.58265	0.00196424	0.00506616	17755333	17827063
ACTN2	ENSG00000077522	4.37347	1.01413	129.272	5.91e-30	4.61e-28	236664141	236764631
ADAM33	ENSG00000149451	3.34954	2.8461	146.118	1.22e-33	1.27e-31	3667965	3682246
ADAMTS1	ENSG00000154734	2.98069	6.55091	158.561	2.33e-36	3e-34	26835755	26845409
ADAMTS20	ENSG00000173157	-3.39172	0.449578	13.0958	0.000295959	0.00097342	43353866	43552203
ADAMTS4	ENSG00000158859	2.49178	5.37823	86.9112	1.14e-20	4.58e-19	161184302	161199054
ADAMTS8	ENSG00000134917	3.24691	1.54119	106.658	5.29e-25	2.88e-23	130404923	130428609
ADAMTS9-AS1	ENSG00000241158	4.76239	1.19065	212.189	4.57e-48	1.39e-45	64561322	64592757
ADAMTS9-AS2	ENSG00000241684	4.04262	-0.96172	221.261	4.8e-50	1.7e-47	64684909	65053439
ADAMTSL3	ENSG00000156218	4.18639	1.81793	242.051	1.4e-54	8.72e-52	83654088	84039842
ADARB1	ENSG00000197381	2.47928	5.05981	137.841	7.9e-32	7.42e-30	45073853	45226560
ADCY10	ENSG00000143199	-2.20302	-0.452456	14.3275	0.000153606	0.000548274	167809386	167914215
ADCY2	ENSG00000078295	2.38343	0.824938	42.2903	7.87e-11	1.01e-09	7396138	7830081
ADCY5	ENSG00000173175	3.30555	3.72076	113.306	1.85e-26	1.12e-24	123282296	123449090
ADCYAP1	ENSG00000141433	2.82199	0.375265	63.5588	1.56e-15	3.64e-14	904871	912172
ADCYAP1R1	ENSG00000078549	3.18721	-0.567317	77.9313	1.07e-18	3.5e-17	31052308	31111479
ADGRA2	ENSG00000020181	2.5619	5.44397	119.555	7.92e-28	5.29e-26	37784191	37844896
ADGRB3	ENSG00000135298	3.04587	0.0943355	61.3849	4.69e-15	1.04e-13	68635282	69389506
ADGRD1	ENSG00000111452	4.15071	2.93133	169.537	9.34e-39	1.42e-36	130953907	131141469
ADGRE1	ENSG00000174837	-2.50352	1.539	13.6295	0.000222653	0.000758445	6887566	6940459
ADGRG2	ENSG00000173698	-2.10536	1.63159	10.4459	0.00122925	0.00337001	18989307	19122637
ADH1B	ENSG00000196616	4.09691	4.66351	91.6043	1.06e-21	4.65e-20	99304971	99352760
ADM2	ENSG00000128165	-2.54695	2.7874	31.6047	1.89e-08	1.66e-07	50481543	50486440
ADRA1D	ENSG00000171873	2.68884	-0.519505	44.4279	2.64e-11	3.63e-10	4220630	4249287
ADRB3	ENSG00000188778	4.2446	-0.573647	98.4637	3.31e-23	1.58e-21	37962990	37966599
AFF3	ENSG00000144218	3.58498	2.09527	136.505	1.55e-31	1.39e-29	99545419	100192428
AGAP12P	ENSG00000265018	-2.0598	-0.280765	14.8749	0.000114884	0.000425542	48009873	48031640
AGAP1-IT1	ENSG00000235529	-2.48662	-1.83594	20.5919	5.68e-06	2.97e-05	235505751	235507566
AGTR1	ENSG00000144891	3.16484	1.19133	80.063	3.63e-19	1.26e-17	148697784	148743008
AHSG	ENSG00000145192	-5.7168	-0.891487	12.6782	0.000369952	0.00117826	186613060	186621318
AIFM3	ENSG00000183773	-2.36087	4.03546	19.2389	1.15e-05	5.6e-05	20965108	20981360
AIRE	ENSG00000160224	-5.06879	1.55379	8.91757	0.0028244	0.00694943	44285838	44298648
AKAP12	ENSG00000131016	2.25748	5.80175	71.9271	2.23e-17	6.35e-16	151239967	151358559
AKAP6	ENSG00000151320	3.43109	2.49051	189.309	4.5e-43	9.31e-41	32329298	32837684
AL355916.1	ENSG00000232774	-3.04927	1.16442	24.2816	8.32e-07	5.23e-06	61570405	61658696
AL589743.1	ENSG00000244306	-3.76796	0.229813	34.6193	4.01e-09	3.95e-08	19268853	19337730
ALB	ENSG00000163631	-8.14098	3.53855	20.8303	5.02e-06	2.67e-05	73397114	73421482
ALDH1B1	ENSG00000137124	2.40804	6.0037	146.888	8.3e-34	8.74e-32	38392702	38398661
ALDOB	ENSG00000136872	-2.98974	0.160024	9.79962	0.00174548	0.00456633	101420560	101449664
ALKAL2	ENSG00000189292	2.09758	-1.0745	41.2497	1.34e-10	1.66e-09	279558	288851
ALOX15B	ENSG00000179593	2.1965	2.49944	31.0552	2.51e-08	2.15e-07	8039034	8049134
ALPP	ENSG00000163283	-7.8113	3.84	31.7805	1.73e-08	1.53e-07	232378724	232382889
ALPPL2	ENSG00000163286	-6.80924	0.684631	17.9934	2.22e-05	0.000100005	232406844	232410714
AMBP	ENSG00000106927	-4.25519	0.380542	11.5019	0.000695268	0.00204693	114060127	114078328
AMH	ENSG00000104899	-3.3807	2.18278	28.9616	7.38e-08	5.81e-07	2249309	2252073
AMTN	ENSG00000187689	-5.41058	0.913998	12.1324	0.000495522	0.00151375	70518569	70532743
AMZ1	ENSG00000174945	-2.18728	0.330737	13.1813	0.000282755	0.000935126	2679522	2775500
ANGPTL1	ENSG00000116194	2.73614	2.78485	51.0058	9.21e-13	1.53e-11	178849535	178871077
ANGPTL3	ENSG00000132855	-2.23371	-1.16621	15.1549	9.9e-05	0.000375178	62597520	62606313
ANGPTL7	ENSG00000171819	4.35132	-0.900288	85.1888	2.71e-20	1.05e-18	11189355	11195981
ANK2	ENSG00000145362	2.84234	3.02454	82.7458	9.33e-20	3.45e-18	112818032	113384221
ANKRD19P	ENSG00000187984	-2.82869	2.98419	27.334	1.71e-07	1.25e-06	92809568	92838457
ANKRD29	ENSG00000154065	2.0178	1.87575	34.7875	3.68e-09	3.65e-08	23598926	23662911
ANKRD34B	ENSG00000189127	-4.28102	-0.45144	14.5919	0.000133485	0.000485472	80556755	80570280
ANKS1B	ENSG00000185046	3.03242	0.273791	90.8357	1.56e-21	6.75e-20	98726457	99984654
ANKUB1	ENSG00000206199	-2.99119	-1.26872	10.5728	0.00114763	0.00317688	149761100	149968385
ANO5	ENSG00000171714	2.21076	1.96327	41.5849	1.13e-10	1.41e-09	21799934	22283357
ANXA6	ENSG00000197043	2.03511	6.78018	64.1923	1.13e-15	2.69e-14	151100706	151157785
AOC1	ENSG00000002726	-2.1944	3.15612	9.02737	0.00265967	0.00659453	150824627	150861504
AOC3	ENSG00000131471	3.27848	5.5909	151.652	7.55e-35	8.69e-33	42851184	42858130
AOX1	ENSG00000138356	3.42239	2.33405	113.492	1.68e-26	1.03e-24	200586014	200677064
APBB1	ENSG00000166313	2.21691	3.77712	90.3529	1.99e-21	8.57e-20	6395124	6419414
APELA	ENSG00000248329	-3.18416	-0.150964	13.086	0.000297504	0.000977577	164877178	164898965
APLN	ENSG00000171388	-2.02043	3.09535	18.1858	2e-05	9.18e-05	129645259	129654956
APOA1	ENSG00000118137	-2.39113	0.452832	8.25795	0.00405739	0.00950536	116835751	116837622
APOA2	ENSG00000158874	-9.5405	5.90609	11.212	0.000812682	0.00234922	161222292	161223631
APOC1	ENSG00000130208	-2.5828	5.33302	36.1026	1.87e-09	1.96e-08	44914247	44919349
APOH	ENSG00000091583	-7.84689	-0.602562	11.1284	0.000850154	0.00244331	66212033	66256525
APOLD1	ENSG00000178878	2.20256	5.17064	107.74	3.06e-25	1.7e-23	12725917	12829975
AQP1	ENSG00000240583	2.36631	6.44246	129.007	6.76e-30	5.22e-28	30911853	30925517
ARC	ENSG00000198576	2.41596	1.32302	33.9636	5.62e-09	5.39e-08	142611049	142614479
ARHGAP20	ENSG00000137727	3.23153	1.06391	184.525	4.98e-42	9.11e-40	110577042	110713189
ARHGEF25	ENSG00000240771	2.55474	4.0077	147.685	5.56e-34	5.93e-32	57610180	57617245
ARHGEF37	ENSG00000183111	2.02854	3.63827	78.154	9.53e-19	3.15e-17	149551947	149634968
ARID3A	ENSG00000116017	-2.04974	4.73953	19.9823	7.82e-06	3.96e-05	925781	975939
ARID5A	ENSG00000196843	2.14461	5.16675	169.719	8.52e-39	1.31e-36	96536743	96552634
ARL14EPL	ENSG00000268223	-3.96007	-1.67779	10.3443	0.00129874	0.00353548	116032324	116060118
ARMC4	ENSG00000169126	2.05296	-0.495913	19.0345	1.28e-05	6.17e-05	27775186	27999079
ARSF	ENSG00000062096	3.46404	-1.53811	34.5495	4.16e-09	4.08e-08	3041471	3112727
ARX	ENSG00000004848	-5.8825	-1.58545	19.0125	1.3e-05	6.24e-05	25003694	25016420
ASB2	ENSG00000100628	3.49158	3.14684	171.334	3.78e-39	6.14e-37	93934166	93976739
ASB5	ENSG00000164122	4.67453	2.39286	63.7168	1.44e-15	3.37e-14	176213673	176277571
ASCL5	ENSG00000232237	-3.79696	-0.466064	23.7335	1.11e-06	6.74e-06	201113953	201127184
ASF1B	ENSG00000105011	-2.16178	5.08192	66.0614	4.37e-16	1.09e-14	14119512	14136613
ASIC5	ENSG00000256394	-4.14593	-0.535671	8.77677	0.00305091	0.00743099	155829729	155866277
ASPA	ENSG00000108381	3.17771	1.02163	103.336	2.83e-24	1.45e-22	3472374	3503405
ASPM	ENSG00000066279	-2.43915	5.67555	59.3535	1.32e-14	2.78e-13	197084127	197146694
ASTL	ENSG00000188886	2.89796	-0.497605	55.644	8.69e-14	1.65e-12	96123850	96138436
ATF3	ENSG00000162772	2.70546	6.80805	103.244	2.96e-24	1.51e-22	212565334	212620777
ATP13A4	ENSG00000127249	2.16513	0.727877	26.0858	3.27e-07	2.23e-06	193398967	193593111
ATP1A2	ENSG00000018625	4.60974	3.51428	131.646	1.79e-30	1.45e-28	160115759	160143591
ATP1A3	ENSG00000105409	-2.28109	1.55436	15.4736	8.37e-05	0.000324123	41966582	41997497
ATP1B2	ENSG00000129244	2.55602	0.978362	143.282	5.1e-33	4.95e-31	7646627	7657770
ATP4A	ENSG00000105675	-4.86379	-1.65583	14.7006	0.000126008	0.000461438	35550031	35563658
ATP6V0A4	ENSG00000105929	-2.64693	2.38683	10.3187	0.00131688	0.00357757	138706294	138799560
ATP6V0D2	ENSG00000147614	-3.77393	0.0753195	26.7433	2.32e-07	1.63e-06	85987323	86154225
ATP6V1B1	ENSG00000116039	-3.27216	2.10904	24.8062	6.34e-07	4.09e-06	70935900	70965431
AUNIP	ENSG00000127423	-2.30083	2.93916	62.3159	2.93e-15	6.59e-14	25831913	25859458
AURKA	ENSG00000087586	-2.50267	5.24116	85.8872	1.9e-20	7.53e-19	56369389	56392337
AURKB	ENSG00000178999	-2.28057	5.00718	57.8076	2.89e-14	5.85e-13	8204733	8210600
B3GALT2	ENSG00000162630	2.31078	-0.469986	35.7669	2.22e-09	2.3e-08	193178730	193186613
B3GNT4	ENSG00000176383	-2.68529	1.34208	42.0493	8.9e-11	1.14e-09	122203681	122208952
B4GALNT2	ENSG00000167080	-5.55819	0.0272309	12.5006	0.000406827	0.001276	49132460	49176840
B4GALNT4	ENSG00000182272	-2.8771	4.36153	21.9152	2.85e-06	1.59e-05	369499	382117
BAAT	ENSG00000136881	-6.4205	1.42611	15.8569	6.83e-05	0.000270898	101354182	101385400
BAG2	ENSG00000112208	2.11985	4.85108	86.4007	1.47e-20	5.87e-19	57172326	57189833
BARX1	ENSG00000131668	-5.75599	2.47326	31.7708	1.73e-08	1.53e-07	93951627	93955355
BCAR4	ENSG00000262117	-5.72369	-0.47335	10.3774	0.00127565	0.00348079	11819829	11828845
BCHE	ENSG00000114200	3.04703	2.37942	66.6946	3.17e-16	8.04e-15	165772904	165837462
BDKRB1	ENSG00000100739	2.5676	1.83351	76.4564	2.25e-18	7.16e-17	96256210	96268967
BDKRB2	ENSG00000168398	2.0658	4.46921	69.9599	6.05e-17	1.64e-15	96204679	96244166
BEST3	ENSG00000127325	-5.90553	-0.186188	14.5607	0.000135719	0.000492328	69643360	69699476
BHMT2	ENSG00000132840	4.02521	1.0572	245.485	2.51e-55	1.67e-52	79069767	79090069
BIN1	ENSG00000136717	2.20902	4.95739	78.2668	9e-19	2.99e-17	127048027	127107288
BLM	ENSG00000197299	-2.01862	3.96251	77.928	1.07e-18	3.5e-17	90717346	90816166
BMP5	ENSG00000112175	3.14837	2.43888	57.7805	2.93e-14	5.93e-13	55753653	55875590
BNC2	ENSG00000173068	2.15208	3.20062	46.8365	7.72e-12	1.14e-10	16409503	16870843
BOC	ENSG00000144857	2.57728	3.71618	73.6993	9.1e-18	2.73e-16	113211003	113287459
BPIFB1	ENSG00000125999	2.60064	4.75384	15.8084	7.01e-05	0.00027692	33273480	33309871
BPIFB2	ENSG00000078898	-7.30704	-1.10113	9.67552	0.00186739	0.00484079	33007704	33023703
BRIP1	ENSG00000136492	-2.3685	4.31324	72.8952	1.37e-17	4.01e-16	61679139	61863528
BUB1B	ENSG00000156970	-2.25337	4.71319	68.0665	1.58e-16	4.11e-15	40161023	40221123
BVES	ENSG00000112276	2.46839	2.88541	68.3249	1.39e-16	3.64e-15	105096822	105137157
BVES-AS1	ENSG00000203808	2.41759	-1.34191	27.9531	1.24e-07	9.3e-07	105136308	105169952
C10orf67	ENSG00000179133	-2.78061	-0.376665	12.2674	0.000460948	0.00142263	23202696	23344845
C11orf96	ENSG00000187479	3.09899	5.61075	158.378	2.56e-36	3.27e-34	43925342	43943878
C15orf48	ENSG00000166920	-2.36628	5.50184	18.7923	1.46e-05	6.91e-05	45430579	45448761
C15orf59	ENSG00000205363	2.51338	1.58914	48.7996	2.84e-12	4.42e-11	73735431	73752747
C16orf45	ENSG00000166780	2.18105	3.97662	89.5953	2.92e-21	1.24e-19	15434475	15625028
C16orf89	ENSG00000153446	4.52003	1.51019	219.829	9.86e-50	3.29e-47	5044122	5066110
C17orf53	ENSG00000125319	-2.05026	3.27006	70.5704	4.44e-17	1.22e-15	44141906	44162476
C1orf105	ENSG00000180999	-5.9617	-1.83997	14.9867	0.000108273	0.000404908	172420685	172468831
C1orf61	ENSG00000125462	-2.13132	-0.180517	10.0429	0.00152932	0.00406945	156404250	156456763
C1QL4	ENSG00000186897	-2.72306	-1.53689	9.447	0.00211495	0.0054059	49332409	49337188
C1QTNF12	ENSG00000184163	-2.30837	1.48262	23.682	1.14e-06	6.9e-06	1242446	1246722
C1QTNF2	ENSG00000145861	2.01269	0.81184	75.1009	4.47e-18	1.38e-16	160347754	160370641
C1QTNF6	ENSG00000133466	-2.53268	5.7955	46.9897	7.14e-12	1.06e-10	37180166	37199385
C1QTNF7	ENSG00000163145	3.55882	1.62365	195.49	2.01e-44	4.73e-42	15339818	15446167
C20orf144	ENSG00000149609	-2.24821	-1.06888	45.7547	1.34e-11	1.93e-10	33662327	33665619
C20orf204	ENSG00000196421	-2.07111	1.38184	30.4208	3.48e-08	2.91e-07	64034344	64039962
C21orf58	ENSG00000160298	-2.77506	3.74165	80.893	2.38e-19	8.38e-18	46300181	46323875
C2CD4B	ENSG00000205502	2.76328	1.49487	85.262	2.61e-20	1.01e-18	62163535	62165285
C2orf40	ENSG00000119147	4.70615	1.41803	151.105	9.94e-35	1.12e-32	106063246	106078155
C2orf66	ENSG00000187944	-2.13483	-0.0901695	12.5234	0.000401896	0.00126327	196804417	196809355
C2orf72	ENSG00000204128	-2.18219	1.87252	8.91589	0.002827	0.00695285	231037523	231049719
C3orf67	ENSG00000163689	-2.02981	2.89645	17.6844	2.61e-05	0.000115291	58717365	59050084
C3orf70	ENSG00000187068	2.49323	3.06483	102.037	5.45e-24	2.72e-22	185076838	185153060
C4orf48	ENSG00000243449	-2.65072	3.02106	51.1029	8.76e-13	1.47e-11	2041993	2043970
C5orf46	ENSG00000178776	-4.02007	1.586	19.531	9.9e-06	4.88e-05	147880726	147906538
C5orf66-AS1	ENSG00000249082	3.46548	-0.076806	98.3029	3.59e-23	1.7e-21	135038831	135040047
C6orf222	ENSG00000189325	-2.62926	-0.0617382	9.10353	0.00255117	0.00636181	36315761	36336888
C6orf223	ENSG00000181577	-4.52512	1.59302	27.717	1.4e-07	1.04e-06	44000580	44007612
C6orf52	ENSG00000137434	-2.04415	0.468523	26.0516	3.32e-07	2.26e-06	10671418	10694797
C7	ENSG00000112936	3.5358	4.85914	70.544	4.5e-17	1.24e-15	40909497	40984643
C7orf61	ENSG00000185955	-2.06419	-0.551053	35.2985	2.83e-09	2.87e-08	100456620	100464260
C8orf88	ENSG00000253250	2.67462	0.820565	66.1899	4.1e-16	1.02e-14	90958471	90985238
C9	ENSG00000113600	-2.02836	-1.85569	9.66899	0.00187405	0.00485659	39284140	39424868
C9orf84	ENSG00000165181	-2.1439	1.33098	21.6218	3.32e-06	1.84e-05	111686173	111795008
CA2	ENSG00000104267	-2.22044	4.97253	15.9531	6.49e-05	0.000258653	85463968	85481493
CA9	ENSG00000107159	-3.34779	4.84983	20.1959	6.99e-06	3.57e-05	35673918	35681159
CABP4	ENSG00000175544	-2.28064	2.23266	21.7584	3.09e-06	1.72e-05	67452406	67461752
CACNA1B	ENSG00000148408	-3.06013	-0.0407393	9.4605	0.00209943	0.00537178	137877782	138124624
CACNA1C	ENSG00000151067	2.90696	3.85298	144.641	2.57e-33	2.57e-31	1970786	2697950
CACNA1E	ENSG00000198216	-3.72007	-0.255358	14.1188	0.000171621	0.000605131	181317690	181808084
CACNA1H	ENSG00000196557	3.72909	5.06493	235.744	3.33e-53	1.75e-50	1153106	1221771
CACNB2	ENSG00000165995	2.95149	2.07261	159.379	1.55e-36	2.04e-34	18140424	18543557
CACNB4	ENSG00000182389	2.5204	1.49504	65.8529	4.86e-16	1.2e-14	151832771	152099167
CACNG4	ENSG00000075461	-3.07233	3.54451	15.0373	0.000105405	0.000396605	66964707	67033398
CADM2	ENSG00000175161	2.03642	0.406248	12.8082	0.00034511	0.00111131	84958989	86074429
CADM3	ENSG00000162706	2.80854	2.12809	28.5551	9.11e-08	7.04e-07	159171609	159203313
CAGE1	ENSG00000164304	-3.12684	-1.50382	14.4418	0.00014456	0.000519949	7326656	7389742
CALB1	ENSG00000104327	-4.85162	4.47396	16.6596	4.47e-05	0.000185553	90058608	90095475
CALCR	ENSG00000004948	-2.18487	-1.67483	10.3399	0.00130183	0.00354221	93424486	93574730
CALHM1	ENSG00000185933	-3.82237	-1.44213	10.566	0.00115189	0.00318766	103453240	103458900
CALHM3	ENSG00000183128	-4.50714	0.984268	17.1589	3.44e-05	0.000146957	103472804	103479240
CAMK2A	ENSG00000070808	4.11043	-0.0435193	150.707	1.21e-34	1.35e-32	150219491	150290291
CAMK2B	ENSG00000058404	-2.61725	1.04183	14.3148	0.000154645	0.000551089	44217150	44334577
CAMK2N2	ENSG00000163888	-2.73522	0.99096	24.0515	9.38e-07	5.82e-06	184259213	184261553
CASC20	ENSG00000229876	-5.08125	-0.957331	14.8662	0.000115411	0.000427131	6446723	6528459
CASKIN1	ENSG00000167971	-2.50949	0.475577	16.5175	4.82e-05	0.000198338	2177180	2196605
CASP14	ENSG00000105141	-4.49367	6.95828	14.9701	0.000109227	0.000407879	15049480	15058293
CASP5	ENSG00000137757	-2.86254	-1.02718	15.9774	6.41e-05	0.000255786	104994235	105023168
CASQ2	ENSG00000118729	4.28016	3.56985	107.839	2.92e-25	1.62e-23	115700021	115768714
CATSPER1	ENSG00000175294	-3.54389	1.61828	32.1891	1.4e-08	1.26e-07	66016752	66026479
CAVIN2	ENSG00000168497	3.43871	4.25825	180.015	4.81e-41	8.36e-39	191834310	191847088
CBLN1	ENSG00000102924	2.10727	-1.51894	13.6277	0.000222875	0.000759051	49277917	49281838
CBS	ENSG00000160200	-2.0822	0.311112	10.9382	0.000942025	0.00267199	43053191	43076943
CBX2	ENSG00000173894	-2.14662	4.59171	23.92	1e-06	6.19e-06	79778148	79787983
CBX7	ENSG00000100307	2.52315	4.76691	229.023	9.74e-52	4.13e-49	39120167	39152680
CCDC114	ENSG00000105479	-2.07921	0.368692	21.8958	2.88e-06	1.61e-05	48296457	48321971
CCDC136	ENSG00000128596	2.60425	1.88862	132.837	9.82e-31	8.12e-29	128790757	128822132
CCDC150	ENSG00000144395	-2.49602	2.08112	63.4118	1.68e-15	3.9e-14	196639554	196763490
CCDC162P	ENSG00000203799	-3.17235	2.56302	22.3448	2.28e-06	1.3e-05	109165831	109355063
CCDC189	ENSG00000196118	-2.11007	1.02922	50.7639	1.04e-12	1.72e-11	30757423	30762221
CCDC69	ENSG00000198624	2.53234	5.53717	153.837	2.51e-35	2.99e-33	151181052	151224093
CCDC80	ENSG00000091986	2.23975	6.81129	45.5235	1.51e-11	2.15e-10	112596797	112649530
CCER2	ENSG00000262484	-4.76959	2.69859	18.0498	2.15e-05	9.75e-05	38908980	38912158
CCL14	ENSG00000276409	3.30809	0.249329	89.0729	3.81e-21	1.59e-19	35983288	35987004
CCL2	ENSG00000108691	2.65099	5.12533	87.2462	9.58e-21	3.9e-19	34255218	34257203
CCNB1	ENSG00000134057	-2.00949	6.31142	56.6158	5.3e-14	1.04e-12	69167135	69178245
CCNB2	ENSG00000157456	-2.13715	5.56205	62.8524	2.23e-15	5.09e-14	59105126	59125045
CCNE1	ENSG00000105173	-2.35542	4.85906	48.0145	4.23e-12	6.47e-11	29811991	29824312
CCNE2	ENSG00000175305	-2.27037	2.73687	41.5402	1.15e-10	1.44e-09	94879770	94896678
CCNYL2	ENSG00000182632	-5.53284	1.39045	19.4908	1.01e-05	4.97e-05	42408168	42475349
CCR3	ENSG00000183625	-3.82438	0.606054	34.3499	4.6e-09	4.49e-08	46163604	46266706
CD300LG	ENSG00000161649	3.86062	-1.43194	58.9177	1.64e-14	3.43e-13	43847148	43863639
CDC20	ENSG00000117399	-2.41507	6.20833	56.4595	5.74e-14	1.12e-12	43358981	43363203
CDC25C	ENSG00000158402	-2.46322	3.15725	68.2261	1.46e-16	3.82e-15	138285265	138338355
CDC45	ENSG00000093009	-2.35363	4.35043	63.9091	1.3e-15	3.07e-14	19479457	19520612
CDC6	ENSG00000094804	-2.02034	5.40452	63.2507	1.82e-15	4.21e-14	40287879	40304657
CDCA2	ENSG00000184661	-2.33917	3.5365	57.4707	3.43e-14	6.92e-13	25459199	25507911
CDCA3	ENSG00000111665	-2.25153	4.80862	67.7312	1.87e-16	4.85e-15	6844793	6851292
CDCA8	ENSG00000134690	-2.39055	5.09049	73.0045	1.29e-17	3.81e-16	37692481	37709719
CDH15	ENSG00000129910	-2.84149	-1.19949	22.9278	1.68e-06	9.9e-06	89171748	89195492
CDH19	ENSG00000071991	2.66568	1.45846	23.3219	1.37e-06	8.22e-06	66501083	66604138
CDH3	ENSG00000062038	-2.66142	7.4212	24.0327	9.47e-07	5.87e-06	68636189	68722616
CDHR2	ENSG00000074276	-2.23709	-0.96877	19.3709	1.08e-05	5.26e-05	176542511	176595974
CDHR5	ENSG00000099834	-2.32195	1.23506	9.54235	0.00200784	0.00516481	616577	626078
CDIPT-AS1	ENSG00000214725	-2.06095	-1.143	12.239	0.000468003	0.00144134	29863593	29868053
CDK1	ENSG00000170312	-2.40541	6.58267	84.3958	4.05e-20	1.54e-18	60778331	60794852
CDK5R2	ENSG00000171450	-4.02997	-0.918316	11.9819	0.000537187	0.00162729	218959666	218962155
CDKL4	ENSG00000205111	-2.25666	-1.61304	13.6951	0.000215015	0.000736179	39175646	39229588
CDKN2A	ENSG00000147889	-4.22933	6.20793	28.1743	1.11e-07	8.41e-07	21967752	21995301
CDKN2B-AS1	ENSG00000240498	-2.94983	0.601659	22.7462	1.85e-06	1.08e-05	21994139	22128103
CDON	ENSG00000064309	2.01842	2.51286	56.3194	6.16e-14	1.2e-12	125955796	126063335
CDT1	ENSG00000167513	-2.19723	5.37402	60.6427	6.84e-15	1.48e-13	88803789	88809258
CDX1	ENSG00000113722	-3.47874	0.360194	16.8875	3.97e-05	0.000167314	150166778	150184558
CDX2	ENSG00000165556	-3.9154	1.57679	12.8335	0.000340475	0.00109924	27960918	27969315
CELF2	ENSG00000048740	2.3744	4.07489	94.4593	2.5e-22	1.13e-20	10798397	11336675
CELF4	ENSG00000101489	-2.68642	0.0344486	15.4053	8.67e-05	0.000334573	37243040	37565827
CELF5	ENSG00000161082	-3.42752	-0.275501	17.8165	2.43e-05	0.000108465	3224661	3297076
CELSR3	ENSG00000008300	-2.77322	4.94602	42.0172	9.05e-11	1.16e-09	48636463	48662886
CEND1	ENSG00000184524	2.05172	-0.248669	30.7741	2.9e-08	2.46e-07	787115	790113
CENPA	ENSG00000115163	-2.91009	3.61929	73.8393	8.47e-18	2.55e-16	26764289	26801067
CENPE	ENSG00000138778	-2.02777	5.33021	64.6107	9.13e-16	2.2e-14	103105349	103198445
CENPI	ENSG00000102384	-2.23228	3.09221	66.1658	4.15e-16	1.03e-14	101098218	101163681
CENPK	ENSG00000123219	-2.29946	4.04014	70.4784	4.65e-17	1.28e-15	65517766	65563168
CFAP47	ENSG00000165164	-3.68522	2.05368	18.7413	1.5e-05	7.08e-05	35919734	36385317
CFAP52	ENSG00000166596	-2.29167	-1.13156	30.545	3.26e-08	2.74e-07	9576627	9643447
CFAP57	ENSG00000243710	-2.15881	0.53371	19.3476	1.09e-05	5.32e-05	43172330	43254358
CFAP74	ENSG00000142609	-2.4303	-0.452648	19.9831	7.81e-06	3.96e-05	1921951	2003837
CFAP77	ENSG00000188523	-3.55709	-1.25157	13.37	0.000255683	0.000857839	132410043	132573319
CFD	ENSG00000197766	3.81478	5.2928	257.632	5.63e-58	4.89e-55	859664	863641
CFHR4	ENSG00000134365	-3.21743	-1.2696	13.2419	0.00027376	0.000910054	196888014	196918713
CFL2	ENSG00000165410	2.71111	4.8148	189.262	4.61e-43	9.42e-41	34709113	34714823
CGB3	ENSG00000104827	-7.28428	-0.654509	19.0111	1.3e-05	6.24e-05	49022869	49024333
CGB5	ENSG00000189052	-8.37729	1.48917	19.8594	8.33e-06	4.19e-05	49043848	49045311
CGB8	ENSG00000213030	-7.50253	-0.0944154	15.3355	9e-05	0.000344796	49047638	49049106
CGNL1	ENSG00000128849	3.29037	3.43747	229.373	8.17e-52	3.55e-49	57375967	57550717
CGREF1	ENSG00000138028	-2.84215	3.27113	24.6515	6.87e-07	4.39e-06	27098889	27119128
CH25H	ENSG00000138135	3.04084	2.23657	148.837	3.11e-34	3.36e-32	89205629	89207317
CHAC1	ENSG00000128965	-2.14789	2.81784	36.6686	1.4e-09	1.49e-08	40952962	40956512
CHD5	ENSG00000116254	2.68433	-0.974543	50.7395	1.05e-12	1.74e-11	6101787	6180321
CHDH	ENSG00000016391	-2.11373	2.73264	23.2807	1.4e-06	8.37e-06	53812335	53846419
CHIT1	ENSG00000133063	-3.92258	2.81655	24.082	9.23e-07	5.74e-06	203212827	203273641
CHRDL1	ENSG00000101938	2.98652	3.10085	36.6475	1.42e-09	1.51e-08	110673856	110795819
CHRM2	ENSG00000181072	4.15221	2.01629	81.0033	2.25e-19	7.96e-18	136868669	137020255
CHRM3	ENSG00000133019	2.90377	2.8512	73.5805	9.66e-18	2.89e-16	239386565	239915452
CHRNA1	ENSG00000138435	-4.48287	0.248807	42.4713	7.17e-11	9.28e-10	174747592	174787935
CHRNA6	ENSG00000147434	-3.4162	-1.33255	14.6249	0.000131173	0.000478335	42752620	42796392
CHRNA9	ENSG00000174343	-5.0319	-0.400367	9.68962	0.00185311	0.00481023	40335333	40355217
CHRNB2	ENSG00000160716	-3.74443	-0.311573	15.8217	6.96e-05	0.000275476	154567778	154580013
CILP	ENSG00000138615	2.97109	4.65666	50.1654	1.41e-12	2.3e-11	65194760	65211473
CKAP2L	ENSG00000169607	-2.47265	4.28384	62.5084	2.65e-15	6e-14	112736349	112764664
CKB	ENSG00000166165	2.37166	6.97943	65.1416	6.97e-16	1.7e-14	103519667	103522833
CKM	ENSG00000104879	2.34937	0.0542324	46.7744	7.96e-12	1.17e-10	45306413	45322875
CKMT2	ENSG00000131730	2.66093	0.246391	122.768	1.57e-28	1.1e-26	81233320	81266398
CLDN2	ENSG00000165376	-3.79624	-0.289942	21.2274	4.08e-06	2.22e-05	106900164	106930861
CLDN5	ENSG00000184113	2.56967	4.13466	113.79	1.45e-26	8.96e-25	19523024	19527545
CLDN6	ENSG00000184697	-5.85415	1.70695	14.5329	0.00013773	0.000498445	3014712	3020071
CLDN9	ENSG00000213937	-4.35042	2.41381	26.1182	3.21e-07	2.2e-06	3012923	3014505
CLEC12B	ENSG00000256660	-2.98769	-0.841554	12.957	0.000318719	0.00103904	10010627	10018796
CLEC18A	ENSG00000157322	-3.73546	-0.836609	22.2914	2.34e-06	1.33e-05	69950705	69964452
CLEC1B	ENSG00000165682	-2.54183	-1.29191	9.07828	0.00258663	0.00643546	9985642	10013424
CLEC3A	ENSG00000166509	3.69661	0.963876	27.7513	1.38e-07	1.02e-06	78022515	78066761
CLEC3B	ENSG00000163815	4.802	2.79644	558.142	2.13e-123	3.7e-119	45001548	45036071
CLEC5A	ENSG00000258227	-2.40472	1.80018	24.8433	6.22e-07	4.02e-06	141927357	141947007
CLIP3	ENSG00000105270	2.78402	4.57341	116.93	2.97e-27	1.94e-25	36014660	36033343
CLPSL1	ENSG00000204140	-4.65234	-1.57053	18.7027	1.53e-05	7.22e-05	35781019	35793675
CLSPN	ENSG00000092853	-2.09242	3.33058	34.4604	4.35e-09	4.26e-08	35720218	35769978
CMA1	ENSG00000092009	3.45664	0.146185	43.7247	3.78e-11	5.08e-10	24505353	24508265
CNDP1	ENSG00000150656	-2.01475	-0.790309	12.3117	0.000450129	0.00139469	74534500	74587212
CNFN	ENSG00000105427	2.59194	4.2616	51.1021	8.77e-13	1.47e-11	42387019	42390297
CNGB1	ENSG00000070729	-4.51595	1.66851	40.1354	2.37e-10	2.82e-09	57882340	57971128
CNGB3	ENSG00000170289	-2.68629	0.85868	35.1141	3.11e-09	3.12e-08	86553977	86743675
CNIH2	ENSG00000174871	-2.12664	1.88783	21.797	3.03e-06	1.69e-05	66278175	66285301
CNN1	ENSG00000130176	3.91115	7.13648	125.941	3.17e-29	2.34e-27	11538767	11550323
CNNM1	ENSG00000119946	2.32626	0.499959	35.2569	2.89e-09	2.93e-08	99329356	99394330
CNTD2	ENSG00000105219	-3.0698	0.2249	26.8512	2.2e-07	1.56e-06	40222208	40226697
CNTN1	ENSG00000018236	2.63356	4.32951	38.8313	4.62e-10	5.29e-09	40692439	41072415
CNTN5	ENSG00000149972	-3.3907	0.742829	12.8318	0.000340774	0.00109979	99020949	100358885
COCH	ENSG00000100473	-2.06429	2.89104	15.7485	7.23e-05	0.00028486	30874514	30895065
COL10A1	ENSG00000123500	-7.32597	5.42002	55.8275	7.91e-14	1.52e-12	116118909	116158747
COL11A1	ENSG00000060718	-6.22504	6.01221	46.892	7.5e-12	1.11e-10	102876467	103108872
COL14A1	ENSG00000187955	2.61339	5.76944	89.2478	3.48e-21	1.46e-19	120059780	120373573
COL19A1	ENSG00000082293	4.12829	0.00459566	81.7982	1.51e-19	5.47e-18	69866556	70212468
COL21A1	ENSG00000124749	2.15219	2.73875	42.2298	8.12e-11	1.04e-09	56056590	56394094
COL2A1	ENSG00000139219	-7.10868	2.69649	26.8054	2.25e-07	1.59e-06	47972967	48004554
COL7A1	ENSG00000114270	-2.35672	8.17672	26.4923	2.65e-07	1.84e-06	48564073	48595267
COLEC12	ENSG00000158270	2.00759	4.10638	34.0043	5.5e-09	5.29e-08	316737	500722
COX7A1	ENSG00000161281	2.87399	2.66039	194.838	2.8e-44	6.48e-42	36150922	36152449
CPA3	ENSG00000163751	2.12342	3.40687	38.6551	5.06e-10	5.75e-09	148865296	148897203
CPA5	ENSG00000158525	-2.19441	-0.992531	13.9674	0.000186013	0.00064968	130344816	130368730
CPA6	ENSG00000165078	2.14953	-0.0475926	16.0499	6.17e-05	0.000247067	67422038	67746378
CPB2	ENSG00000080618	-3.36958	-1.46435	14.8307	0.000117603	0.000434135	46053186	46105033
CPEB1	ENSG00000214575	3.47398	0.423664	151.942	6.53e-35	7.61e-33	82543201	82648861
CPED1	ENSG00000106034	3.54528	3.3402	221.283	4.75e-50	1.7e-47	120988697	121297442
CPLX2	ENSG00000145920	-6.88342	2.96632	15.3571	8.9e-05	0.000341411	175796310	175884021
CPNE4	ENSG00000196353	-2.54781	1.23265	11.2683	0.000788408	0.00228742	131533555	132285410
CPNE6	ENSG00000100884	4.16849	-1.3438	76.4253	2.29e-18	7.27e-17	24070837	24078100
CPXM2	ENSG00000121898	2.57957	4.56828	68.6821	1.16e-16	3.06e-15	123706207	123940267
CR1L	ENSG00000197721	-2.79171	-1.83286	14.0525	0.00017778	0.000623433	207645113	207738416
CRCT1	ENSG00000169509	2.53806	3.22069	18.6365	1.58e-05	7.43e-05	152514482	152516008
CRISP3	ENSG00000096006	2.55921	4.58991	19.4609	1.03e-05	5.04e-05	49727376	49744437
CRISPLD2	ENSG00000103196	2.01322	6.24454	60.406	7.72e-15	1.65e-13	84819985	84920768
CRNN	ENSG00000143536	7.49844	4.42324	112.384	2.94e-26	1.76e-24	152409243	152414263
CRYAB	ENSG00000109846	2.92364	4.99316	103.709	2.34e-24	1.22e-22	111908564	111923722
CRYM	ENSG00000103316	2.22021	2.28734	33.0414	9.02e-09	8.38e-08	21238874	21303083
CSAG3	ENSG00000268916	-3.87607	0.578039	14.4797	0.000141682	0.000510759	152753921	152760222
CSDC2	ENSG00000172346	2.53209	2.43664	51.4481	7.35e-13	1.25e-11	41561010	41577741
CSF2	ENSG00000164400	-3.21512	0.387981	15.3889	8.75e-05	0.000336822	132073789	132076170
CSF3	ENSG00000108342	3.27533	3.29743	42.3966	7.45e-11	9.62e-10	40015361	40017813
CSRNP1	ENSG00000144655	2.78806	5.86082	274.093	1.46e-61	1.81e-58	39141855	39154562
CSRP1	ENSG00000159176	2.56342	8.39749	185.421	3.18e-42	6e-40	201483530	201509456
CST1	ENSG00000170373	-8.56089	5.04384	43.8649	3.52e-11	4.75e-10	23747553	23751268
CST2	ENSG00000170369	-6.07813	0.186204	38.3596	5.88e-10	6.63e-09	23823769	23826729
CST4	ENSG00000101441	-9.10632	0.602101	38.5302	5.39e-10	6.11e-09	23685640	23689040
CST6	ENSG00000175315	-3.6991	4.97898	28.0368	1.19e-07	8.96e-07	66012008	66013505
CT62	ENSG00000225362	-2.43148	-1.38971	8.16782	0.00426402	0.00993613	71110244	71115494
CT83	ENSG00000204019	-8.37178	-0.106103	13.2326	0.000275116	0.000914036	116461686	116462976
CTAGE15	ENSG00000271079	-2.34251	-1.74647	10.136	0.00145399	0.00389285	143571801	143574387
CTAGE4	ENSG00000225932	-2.3767	-1.34845	17.4235	2.99e-05	0.000130158	144183466	144186053
CTAGE8	ENSG00000244693	-2.20486	-1.43662	16.4109	5.1e-05	0.000208428	144266701	144269288
CTGF	ENSG00000118523	2.58321	7.39981	86.8647	1.16e-20	4.65e-19	131948176	131951372
CTNNA3	ENSG00000183230	2.83954	0.410902	37.225	1.05e-09	1.15e-08	65912523	67696195
CTSE	ENSG00000196188	-2.7089	5.94643	8.37817	0.00379755	0.00897772	206008535	206023909
CTSG	ENSG00000100448	3.00258	1.78663	47.6398	5.12e-12	7.77e-11	24573518	24576250
CTSV	ENSG00000136943	-2.54691	4.40279	18.6549	1.57e-05	7.37e-05	97029677	97039643
CXCL10	ENSG00000169245	-2.91293	6.66826	17.4308	2.98e-05	0.000129725	76021118	76023497
CXCL11	ENSG00000169248	-3.46621	5.28605	18.7009	1.53e-05	7.22e-05	76033682	76041415
CXCL2	ENSG00000081041	2.15169	3.40443	32.2831	1.33e-08	1.21e-07	74097040	74099196
CXCL5	ENSG00000163735	-3.98531	3.71971	15.7524	7.22e-05	0.000284457	73995642	73998677
CXCL9	ENSG00000138755	-2.4272	6.67055	12.6273	0.000380164	0.00120586	76001275	76007509
CXCR2	ENSG00000180871	2.40713	1.57401	52.9263	3.46e-13	6.09e-12	218125289	218137251
CYP11A1	ENSG00000140459	-2.86464	2.7166	14.3174	0.000154431	0.000550664	74337759	74367646
CYP21A2	ENSG00000231852	2.06396	-1.67988	25.9056	3.59e-07	2.43e-06	32038327	32041644
CYP26A1	ENSG00000095596	-3.64352	0.369181	11.423	0.000725409	0.00212449	93073475	93077885
CYP27B1	ENSG00000111012	-2.7665	2.34493	56.0691	7e-14	1.35e-12	57762334	57768986
CYP2A6	ENSG00000255974	4.1357	-0.41079	60.8868	6.05e-15	1.31e-13	40843541	40850447
CYP2B7P	ENSG00000256612	2.0597	0.846049	14.6159	0.000131799	0.000479912	40924219	40950660
CYP2C8	ENSG00000138115	-2.17485	0.270347	12.9408	0.000321501	0.00104666	95036772	95069497
CYP2C9	ENSG00000138109	-4.5462	1.44231	12.9862	0.000313792	0.0010249	94938658	94990091
CYP3A7	ENSG00000160870	-2.6775	0.895877	16.8164	4.12e-05	0.0001729	99705036	99735196
CYP4F2	ENSG00000186115	-3.31066	1.2395	8.72124	0.00314525	0.00761486	15878023	15898077
CYP8B1	ENSG00000180432	-2.44541	0.0924794	8.89742	0.00285574	0.00701461	42856005	42875898
CYR61	ENSG00000142871	2.57741	7.71797	104.59	1.5e-24	7.91e-23	85580761	85584589
CYS1	ENSG00000205795	2.31613	1.60115	61.1064	5.41e-15	1.19e-13	10056780	10080944
DAAM2	ENSG00000146122	2.33363	3.18385	107.44	3.57e-25	1.97e-23	39792298	39904877
DACT3	ENSG00000197380	3.20673	3.33312	142.778	6.57e-33	6.35e-31	46647551	46661182
DAPL1	ENSG00000163331	2.15038	2.68202	11.7701	0.000601881	0.0018016	158795317	158862781
DAW1	ENSG00000123977	-4.3382	-1.62217	9.3937	0.00217733	0.00554252	227871054	227924344
DCAF12L2	ENSG00000198354	2.14348	-1.57272	16.3161	5.36e-05	0.00021778	126163499	126166289
DCDC1	ENSG00000170959	-3.0864	-0.682076	18.0234	2.18e-05	9.87e-05	30830369	31369810
DCHS1	ENSG00000166341	2.05207	4.51677	80.3573	3.12e-19	1.09e-17	6621330	6655809
DCHS2	ENSG00000197410	3.01356	-0.46267	54.5193	1.54e-13	2.83e-12	154231742	154491799
DCLK1	ENSG00000133083	2.18754	2.64194	39.8573	2.73e-10	3.22e-09	35768652	36131382
DCN	ENSG00000011465	2.0222	8.98712	39.313	3.61e-10	4.2e-09	91140484	91183217
DCST1	ENSG00000163357	-2.44771	-0.412353	41.0778	1.46e-10	1.81e-09	155033824	155050930
DCSTAMP	ENSG00000164935	-3.66752	-0.683788	12.6121	0.000383259	0.00121413	104339087	104356689
DDC	ENSG00000132437	-3.73959	0.104641	8.26605	0.00403933	0.00946814	50458436	50565405
DDN	ENSG00000181418	-2.9853	0.267579	24.4307	7.7e-07	4.87e-06	48995149	48999375
DDR2	ENSG00000162733	2.37476	4.85241	83.0032	8.19e-20	3.05e-18	162631373	162787405
DDX11-AS1	ENSG00000245614	-2.03493	0.743537	49.0632	2.48e-12	3.89e-11	31019434	31073847
DDX53	ENSG00000184735	-6.24091	-0.998245	8.76945	0.00306318	0.00745354	22999960	23003589
DEFB126	ENSG00000125788	-4.30131	-0.617291	19.419	1.05e-05	5.14e-05	142590	145751
DEPDC1	ENSG00000024526	-2.17275	4.76875	48.8665	2.74e-12	4.28e-11	68474152	68497221
DEPDC1B	ENSG00000035499	-2.49849	3.69888	70.0302	5.84e-17	1.59e-15	60596912	60700190
DES	ENSG00000175084	3.0571	9.21679	39.8744	2.71e-10	3.19e-09	219418377	219426734
DGKB	ENSG00000136267	3.59278	0.191485	78.5687	7.73e-19	2.59e-17	14145049	14974777
DGKG	ENSG00000058866	2.34356	2.10104	66.0026	4.5e-16	1.12e-14	186105668	186362234
DGKK	ENSG00000274588	-5.60703	-0.362743	11.0462	0.000888715	0.00254069	50365409	50470825
DIO1	ENSG00000211452	-3.07252	0.155263	14.791	0.000120106	0.000442248	53891239	53911086
DIRAS1	ENSG00000176490	2.05731	1.953	24.5427	7.27e-07	4.63e-06	2714567	2721372
DISC1FP1	ENSG00000261645	-2.68534	-1.80706	8.75904	0.00308071	0.00748614	90251204	90915052
DISP3	ENSG00000204624	-3.07141	0.360985	20.533	5.86e-06	3.05e-05	11479155	11537551
DIXDC1	ENSG00000150764	2.91251	4.00824	200.712	1.46e-45	3.79e-43	111927144	112022653
DKK2	ENSG00000155011	-2.82869	2.09936	27.972	1.23e-07	9.23e-07	106921802	107283806
DLG1-AS1	ENSG00000227375	-2.10862	-1.17831	25.5845	4.23e-07	2.83e-06	197298252	197303755
DLG2	ENSG00000150672	2.24681	1.50428	87.6396	7.85e-21	3.22e-19	83455012	85627922
DLGAP5	ENSG00000126787	-2.16406	4.90749	50.5019	1.19e-12	1.95e-11	55148112	55191608
DLL3	ENSG00000090932	-4.28867	0.843976	20.1935	7e-06	3.58e-05	39498895	39508481
DLX1	ENSG00000144355	-2.61234	-0.269674	12.3763	0.000434826	0.00135307	172084740	172089677
DLX2	ENSG00000115844	-3.28958	-1.1685	12.8946	0.000329537	0.00106889	172099438	172102900
DLX3	ENSG00000064195	-2.1214	2.99284	11.0233	0.000899739	0.00256798	49990005	49995224
DLX4	ENSG00000108813	-3.00017	1.21563	24.9465	5.89e-07	3.82e-06	49968970	49974959
DLX6	ENSG00000006377	-3.30947	1.71366	25.1815	5.22e-07	3.43e-06	97005553	97011040
DMBX1	ENSG00000197587	-3.06065	2.30865	16.4364	5.03e-05	0.000205835	46489836	46516216
DMD	ENSG00000198947	3.23437	4.61752	150.323	1.47e-34	1.63e-32	31097677	33339441
DMGDH	ENSG00000132837	2.47859	-0.636766	167.616	2.45e-38	3.58e-36	78997564	79236038
DMPK	ENSG00000104936	2.10452	5.7033	200.743	1.44e-45	3.78e-43	45769709	45782552
DMRT2	ENSG00000173253	-3.7631	0.859192	13.5886	0.000227567	0.000773364	1049858	1057552
DMRT3	ENSG00000064218	-2.94749	-1.65963	8.82655	0.00296879	0.00725434	976655	991732
DMRTA2	ENSG00000142700	-4.30557	1.54127	24.7578	6.5e-07	4.18e-06	50417550	50423443
DNA2	ENSG00000138346	-2.00614	3.40253	82.9062	8.6e-20	3.19e-18	68414064	68472121
DNAAF3	ENSG00000167646	-2.63184	0.147436	24.4883	7.48e-07	4.75e-06	55158661	55166722
DNAH11	ENSG00000105877	-2.21275	0.748626	8.98077	0.00272836	0.00674078	21543039	21901839
DNAH3	ENSG00000158486	-2.03974	1.38275	26.7563	2.31e-07	1.62e-06	20933111	21159441
DNAJB13	ENSG00000187726	-3.15154	0.692986	21.9918	2.74e-06	1.54e-05	73951026	73970366
DNAJB5	ENSG00000137094	2.91704	3.87503	185.696	2.77e-42	5.28e-40	34989641	34998900
DNAJC22	ENSG00000178401	-2.3676	1.62515	21.3324	3.86e-06	2.11e-05	49346888	49357546
DNAJC5B	ENSG00000147570	-2.43199	0.238029	12.6298	0.00037965	0.00120445	66021553	66101245
DNASE1L2	ENSG00000167968	-2.50867	0.94602	41.6698	1.08e-10	1.36e-09	2235816	2238711
DNMT3B	ENSG00000088305	-2.37491	4.20005	43.6132	4e-11	5.36e-10	32762385	32809356
DOC2A	ENSG00000149927	-2.72225	0.916614	17.8205	2.43e-05	0.000108324	30005514	30023270
DOK6	ENSG00000206052	3.16188	2.37962	125.143	4.74e-29	3.46e-27	69400888	69849087
DPCR1	ENSG00000168631	3.81061	-0.853328	27.1841	1.85e-07	1.34e-06	30934523	30954221
DPF1	ENSG00000011332	-2.23145	0.4764	22.8743	1.73e-06	1.01e-05	38211006	38229714
DPT	ENSG00000143196	3.22578	4.1288	61.3917	4.68e-15	1.04e-13	168695468	168729206
DRAXIN	ENSG00000162490	-3.42022	1.05852	32.6843	1.08e-08	9.93e-08	11691710	11725857
DRC1	ENSG00000157856	-3.12603	-1.54559	16.3734	5.2e-05	0.000212238	26401920	26456711
DSCAML1	ENSG00000177103	2.09925	-0.337268	18.708	1.52e-05	7.2e-05	117427772	117817525
DTNA	ENSG00000134769	3.52757	3.51026	151.803	6.99e-35	8.1e-33	34493290	34891844
DUSP1	ENSG00000120129	2.90489	7.95967	159.321	1.59e-36	2.06e-34	172768096	172771195
DUSP2	ENSG00000158050	2.47167	5.78285	63.9331	1.29e-15	3.04e-14	96143169	96145440
DUSP5	ENSG00000138166	2.07688	6.45937	69.4977	7.65e-17	2.05e-15	110497907	110511533
DUSP8	ENSG00000184545	2.2216	3.00295	96.77	7.79e-23	3.61e-21	1554051	1572271
DUSP9	ENSG00000130829	-2.39615	3.4741	16.2846	5.45e-05	0.000221025	153642492	153651326
DUXAP8	ENSG00000206195	-3.11261	2.86393	33.2727	8.01e-09	7.5e-08	15784959	15829984
DYNC1I1	ENSG00000158560	2.17717	3.18536	56.7072	5.06e-14	9.99e-13	95772506	96110322
E2F7	ENSG00000165891	-2.52882	3.57622	48.9624	2.61e-12	4.08e-11	77021248	77065569
EBF1	ENSG00000164330	2.41331	2.84045	113.448	1.72e-26	1.05e-24	158695916	159099916
EBF2	ENSG00000221818	2.54527	0.121751	83.8739	5.27e-20	2e-18	25841725	26045413
ECEL1	ENSG00000171551	-2.91265	1.2335	16.1254	5.93e-05	0.000238401	232479827	232487834
ECEL1P2	ENSG00000244280	-3.75588	-1.77478	10.201	0.00140365	0.00378021	232385750	232387457
EEF1A2	ENSG00000101210	-2.22894	6.0729	9.79377	0.00175104	0.00457742	63488013	63499239
EFCAB8	ENSG00000215529	-2.02624	-1.3005	11.692	0.000627677	0.00186948	32858923	32961609
EFNA2	ENSG00000099617	-2.77131	-0.589043	8.9275	0.00280908	0.00691858	1285873	1301431
EGR1	ENSG00000120738	2.97726	7.98561	159.591	1.39e-36	1.84e-34	138465479	138469303
EGR2	ENSG00000122877	2.19161	3.65807	63.9903	1.25e-15	2.96e-14	62811996	62919900
EGR3	ENSG00000179388	3.72103	3.69673	207.415	5.03e-47	1.43e-44	22687659	22693480
ELAVL2	ENSG00000107105	-3.27738	1.30647	16.4665	4.95e-05	0.000202922	23690104	23826337
ELFN1-AS1	ENSG00000236081	-3.56105	0.453558	20.4399	6.15e-06	3.19e-05	1738630	1742291
ELN	ENSG00000049540	2.21554	5.51412	47.971	4.33e-12	6.61e-11	74027789	74069907
ELOVL3	ENSG00000119915	-2.2277	-0.0411698	17.264	3.25e-05	0.000140033	102226299	102229589
EME1	ENSG00000154920	-2.95274	2.71573	92.5144	6.68e-22	2.96e-20	50373220	50381483
EMILIN1	ENSG00000138080	2.10345	6.85729	51.6102	6.77e-13	1.16e-11	27078615	27086403
EML1	ENSG00000066629	2.18345	4.04073	94.9769	1.93e-22	8.81e-21	99737693	99942060
EMP1	ENSG00000134531	2.35145	7.58494	93.6176	3.83e-22	1.71e-20	13196723	13219941
EMX1	ENSG00000135638	-2.67698	0.670353	12.7348	0.000358914	0.00114895	72916260	72936071
EN2	ENSG00000164778	-4.6057	0.397761	23.3098	1.38e-06	8.26e-06	155458129	155464831
ENDOU	ENSG00000111405	3.56463	0.462048	77.4176	1.38e-18	4.47e-17	47709734	47725567
ENKUR	ENSG00000151023	-2.59854	-0.576274	26.5196	2.61e-07	1.82e-06	24981979	25062279
ENPP6	ENSG00000164303	2.60944	-0.613975	55.5787	8.98e-14	1.7e-12	184088706	184221230
ENTPD8	ENSG00000188833	-5.16966	2.27842	21.3829	3.76e-06	2.06e-05	137434364	137441816
EPHA3	ENSG00000044524	2.43006	3.13343	90.1948	2.16e-21	9.19e-20	89107621	89482134
EPHA6	ENSG00000080224	2.75907	-0.900615	35.1906	2.99e-09	3.02e-08	96814581	97752460
EPHA7	ENSG00000135333	3.00373	2.65638	81.5236	1.73e-19	6.23e-18	93240020	93419559
EPHA8	ENSG00000070886	-4.16093	-1.67835	10.3867	0.00126929	0.00346725	22563489	22603595
EPHB1	ENSG00000154928	2.9873	1.36865	103.497	2.61e-24	1.34e-22	134597801	135260467
EPM2A	ENSG00000112425	2.22504	3.07732	244.389	4.34e-55	2.79e-52	145382535	145736023
EPO	ENSG00000130427	-2.07641	-1.52852	9.15351	0.00248242	0.00621714	100720468	100723700
EPS8L3	ENSG00000198758	-2.91523	2.68821	10.3836	0.00127143	0.00347145	109750080	109764027
EPYC	ENSG00000083782	-6.53223	1.5361	20.8253	5.03e-06	2.68e-05	90963682	91005026
ERCC6L	ENSG00000186871	-2.35236	3.09469	60.2285	8.45e-15	1.8e-13	72204657	72239027
ERVMER34-1	ENSG00000226887	-2.5822	3.35262	30.3412	3.62e-08	3.02e-07	52722618	52751586
ERVV-1	ENSG00000269526	-2.51485	0.621303	9.45567	0.00210497	0.00538356	53013921	53016122
ERVV-2	ENSG00000268964	-8.86825	0.371194	33.9139	5.76e-09	5.52e-08	53044740	53051680
ERVW-1	ENSG00000242950	-3.4266	-0.363911	9.11365	0.00253709	0.00633305	92468380	92477986
ESM1	ENSG00000164283	-5.18666	4.1215	80.7586	2.55e-19	8.95e-18	54977867	55022671
ESPNP	ENSG00000268869	-5.18288	-1.7207	23.3864	1.33e-06	7.97e-06	16687339	16720157
ESR1	ENSG00000091831	2.70229	2.84092	82.2432	1.2e-19	4.39e-18	151656691	152129619
ESX1	ENSG00000123576	-5.72826	-1.71915	11.4765	0.000704826	0.00207051	104250038	104254933
ETV4	ENSG00000175832	-2.66416	5.3402	40.4234	2.04e-10	2.47e-09	43527844	43579620
EVA1A	ENSG00000115363	-4.14663	2.59826	42.7482	6.23e-11	8.1e-10	75469302	75569722
EXO1	ENSG00000174371	-2.47482	3.85443	60.9564	5.84e-15	1.27e-13	241847967	241895148
F10	ENSG00000126218	3.92342	0.937993	315.673	1.27e-70	2.76e-67	113122799	113149529
F2RL2	ENSG00000164220	-2.07234	2.27272	10.3586	0.00128871	0.00351156	76615482	76623413
FABP1	ENSG00000163586	-9.40531	0.893567	9.09353	0.00256515	0.00639187	88122982	88128062
FABP6	ENSG00000170231	-2.16845	3.69035	12.1117	0.000501072	0.00152989	160187367	160238735
FAIM2	ENSG00000135472	3.74012	0.979296	136.761	1.36e-31	1.23e-29	49866896	49904217
FAM107A	ENSG00000168309	4.03587	3.20079	235.281	4.21e-53	2.15e-50	58564117	58627610
FAM111B	ENSG00000189057	-2.51092	4.80078	50.91	9.67e-13	1.61e-11	59107185	59127412
FAM129A	ENSG00000135842	3.0293	6.17939	171.275	3.9e-39	6.27e-37	184790724	184974508
FAM149A	ENSG00000109794	2.07252	2.48249	47.5927	5.25e-12	7.95e-11	186104419	186172667
FAM171A2	ENSG00000161682	-2.69108	2.46713	34.7788	3.69e-09	3.66e-08	44353215	44363853
FAM180A	ENSG00000189320	2.55773	0.181382	42.8898	5.79e-11	7.56e-10	135728348	135748813
FAM189A2	ENSG00000135063	2.67588	1.92384	117.5	2.23e-27	1.46e-25	69324567	69392558
FAM19A3	ENSG00000184599	-4.09529	-1.48028	29.0265	7.14e-08	5.64e-07	112720419	112727235
FAM225A	ENSG00000231528	-2.07871	-0.449551	17.1027	3.54e-05	0.000150886	113113042	113119928
FAM227A	ENSG00000184949	-2.36886	2.03496	43.0167	5.43e-11	7.13e-10	38578120	38656629
FAM43A	ENSG00000185112	2.00143	3.62954	79.2008	5.61e-19	1.91e-17	194685883	194689037
FAM46B	ENSG00000158246	3.20642	3.39834	116.543	3.61e-27	2.31e-25	27005020	27012850
FAM57B	ENSG00000149926	-4.01874	0.104539	24.4827	7.5e-07	4.76e-06	30024427	30052978
FAM72A	ENSG00000196550	-2.61481	1.08743	68.8355	1.07e-16	2.85e-15	206186179	206204414
FAM72B	ENSG00000188610	-3.07921	1.46297	70.7772	4e-17	1.11e-15	121167646	121185539
FAM72C	ENSG00000263513	-3.18053	0.411458	63.7917	1.38e-15	3.25e-14	143955364	143971965
FAM72D	ENSG00000215784	-3.26737	0.832197	76.3655	2.36e-18	7.47e-17	145095974	145112696
FANCA	ENSG00000187741	-2.28781	4.58497	79.1751	5.68e-19	1.93e-17	89737549	89816657
FANCB	ENSG00000181544	-2.35124	2.04838	74.456	6.2e-18	1.89e-16	14835961	14873069
FAR2P1	ENSG00000180178	-6.65369	3.10455	26.3525	2.84e-07	1.96e-06	130012065	130040560
FAT4	ENSG00000196159	2.23911	2.77144	88.0861	6.27e-21	2.58e-19	125314918	125492932
FAXDC2	ENSG00000170271	2.74092	3.11402	191.905	1.22e-43	2.62e-41	154818492	154859252
FBLN2	ENSG00000163520	2.44634	6.46361	68.8101	1.08e-16	2.88e-15	13549125	13638422
FBLN5	ENSG00000140092	2.32702	4.79696	97.8225	4.58e-23	2.15e-21	91869412	91947987
FBN2	ENSG00000138829	-3.40792	5.87215	23.294	1.39e-06	8.32e-06	128257909	128659185
FBXL22	ENSG00000197361	3.72156	1.73794	320.166	1.33e-71	3.31e-68	63597353	63602428
FBXL7	ENSG00000183580	2.76819	2.92225	181.561	2.21e-41	3.92e-39	15500180	15939795
FBXW12	ENSG00000164049	-2.94007	-0.839617	21.9094	2.86e-06	1.6e-05	48372219	48401259
FCGR1A	ENSG00000150337	-2.09515	2.13317	18.2417	1.95e-05	8.97e-05	149782671	149792518
FCGR3A	ENSG00000203747	-2.0129	5.90127	15.4419	8.51e-05	0.000328666	161541759	161550737
FCRLB	ENSG00000162746	-3.33947	4.178	29.3269	6.11e-08	4.91e-07	161721563	161728143
FENDRR	ENSG00000268388	3.66223	3.72779	145.362	1.79e-33	1.81e-31	86474529	86509099
FER1L4	ENSG00000088340	-2.05077	8.00823	12.9449	0.000320799	0.00104484	35558737	35607562
FERMT2	ENSG00000073712	2.35591	5.42066	106.958	4.55e-25	2.48e-23	52857268	52952435
FEZF1	ENSG00000128610	-2.91775	0.202733	9.89753	0.001655	0.0043585	122301303	122310691
FEZF1-AS1	ENSG00000230316	-3.1426	1.20636	13.4396	0.000246363	0.00082913	122303658	122310119
FGF10	ENSG00000070193	4.01115	-0.245752	80.4964	2.91e-19	1.02e-17	44300247	44389706
FGF11	ENSG00000161958	-2.40462	0.676062	20.5457	5.82e-06	3.04e-05	7438273	7444937
FGF2	ENSG00000138685	2.40133	3.24154	68.1778	1.49e-16	3.9e-15	122826708	122898236
FGF7	ENSG00000140285	2.17909	4.39511	33.1176	8.68e-09	8.08e-08	49423237	49488775
FGF8	ENSG00000107831	-5.52892	-0.0780577	15.8091	7.01e-05	0.00027692	101770130	101780369
FGF9	ENSG00000102678	2.70519	-0.193454	32.2857	1.33e-08	1.2e-07	21671073	21704498
FGL1	ENSG00000104760	-7.35668	-1.0559	22.5114	2.09e-06	1.2e-05	17864380	17910365
FGL2	ENSG00000127951	2.97363	5.43488	126.46	2.44e-29	1.82e-27	77193369	77199848
FHL1	ENSG00000022267	3.79053	6.13105	173.671	1.17e-39	1.91e-37	136146702	136211359
FHL5	ENSG00000112214	2.13018	0.139351	56.103	6.88e-14	1.33e-12	96562548	96616636
FILIP1	ENSG00000118407	3.75661	3.58695	253.81	3.84e-57	3.03e-54	75291859	75493800
FILIP1L	ENSG00000168386	2.06898	6.09748	68.626	1.19e-16	3.15e-15	99830141	100114513
FIRRE	ENSG00000213468	-4.16351	1.63603	48.6545	3.05e-12	4.74e-11	131688779	131830862
FLNA	ENSG00000196924	2.0071	10.4568	64.2621	1.09e-15	2.6e-14	154348524	154374634
FLNC	ENSG00000128591	4.38117	6.92656	192.641	8.43e-44	1.88e-41	128830406	128859274
FMO3	ENSG00000007933	-2.49294	2.72859	11.3303	0.000762536	0.00222052	171090901	171117819
FNBP1	ENSG00000187239	2.0821	5.8611	154.389	1.9e-35	2.3e-33	129887187	130043194
FNDC1	ENSG00000164694	-2.63463	4.19867	14.7549	0.000122427	0.000449554	159169400	159272108
FOLR1	ENSG00000110195	-4.9162	2.21945	18.6093	1.6e-05	7.53e-05	72189558	72196323
FOS	ENSG00000170345	2.73938	9.04983	120.511	4.89e-28	3.32e-26	75278826	75282230
FOSB	ENSG00000125740	3.76642	7.43317	170.247	6.53e-39	1.01e-36	45467995	45475179
FOXA2	ENSG00000125798	-6.31911	0.512722	12.4236	0.000423934	0.00132249	22580998	22585455
FOXA3	ENSG00000170608	-2.43299	0.200904	10.7331	0.00105238	0.00294132	45863989	45873797
FOXB1	ENSG00000171956	-4.74463	-1.06731	9.95494	0.00160418	0.00424137	60004234	60061730
FOXD1	ENSG00000251493	-3.04463	2.03425	16.6625	4.47e-05	0.000185362	73444827	73448777
FOXD3	ENSG00000187140	2.49109	-1.64103	23.1196	1.52e-06	9.05e-06	63322567	63325128
FOXF1	ENSG00000103241	3.01505	4.20696	155.791	9.41e-36	1.15e-33	86510527	86515422
FOXH1	ENSG00000160973	-3.40696	0.561341	25.6104	4.18e-07	2.79e-06	144473412	144475849
FOXL2	ENSG00000183770	-3.40004	1.38101	17.9932	2.22e-05	0.000100005	138944224	138947137
FOXM1	ENSG00000111206	-2.1807	6.00515	47.3237	6.02e-12	9.07e-11	2857680	2877174
FOXP2	ENSG00000128573	2.65488	3.06142	76.2139	2.55e-18	8.04e-17	114086327	114693772
FOXP4-AS1	ENSG00000234753	-3.51843	-1.11415	33.7719	6.2e-09	5.89e-08	41494853	41548621
FRMD5	ENSG00000171877	-2.35657	1.7126	27.5841	1.5e-07	1.11e-06	43870761	44195271
FSD1	ENSG00000105255	-3.33897	2.17487	24.9663	5.83e-07	3.79e-06	4304598	4323843
FSTL5	ENSG00000168843	-3.53445	0.830295	8.25279	0.00406894	0.0095309	161383897	162164004
FXYD1	ENSG00000266964	3.42987	-0.419417	192.241	1.03e-43	2.24e-41	35138824	35143109
FXYD4	ENSG00000150201	-3.94918	3.78408	14.0688	0.000176247	0.000619431	43371636	43376335
FXYD6	ENSG00000137726	3.40055	4.36072	145.535	1.64e-33	1.67e-31	117836976	117877486
FZD7	ENSG00000155760	2.03247	4.85768	98.9263	2.62e-23	1.26e-21	202034587	202038445
GABBR2	ENSG00000136928	-2.79755	4.5415	10.9196	0.000951524	0.00269542	98288109	98708935
GABRD	ENSG00000187730	-2.09453	1.34786	28.5432	9.16e-08	7.07e-07	2019329	2030758
GABRR3	ENSG00000183185	-3.82297	-1.01094	9.36787	0.00220823	0.00560967	97986673	98035304
GADD45B	ENSG00000099860	2.37118	5.70567	121.061	3.7e-28	2.54e-26	2476122	2478259
GAL	ENSG00000069482	-4.30631	2.22602	16.3143	5.37e-05	0.00021794	68683779	68691175
GALNT15	ENSG00000131386	2.65564	2.35127	76.6772	2.01e-18	6.43e-17	16174680	16231992
GALNT17	ENSG00000185274	3.75293	1.89562	123.088	1.33e-28	9.46e-27	71132144	71713600
GALNT6	ENSG00000139629	-2.07815	4.80107	30.6205	3.14e-08	2.64e-07	51351247	51392867
GALR2	ENSG00000182687	-2.6567	0.251474	17.5064	2.86e-05	0.000125234	76074781	76077537
GAS1RR	ENSG00000226237	2.03087	-0.751719	30.2773	3.74e-08	3.11e-07	86948666	87002033
GAS6-AS2	ENSG00000272695	2.12614	0.289716	37.917	7.38e-10	8.18e-09	113864112	113866834
GAS7	ENSG00000007237	2.06256	4.52519	55.3838	9.91e-14	1.87e-12	9910606	10198606
GATA5	ENSG00000130700	4.36104	1.31367	120.955	3.91e-28	2.66e-26	62463497	62475995
GATA6	ENSG00000141448	2.98566	2.87141	148.297	4.09e-34	4.38e-32	22169589	22202528
GATA6-AS1	ENSG00000266010	2.43364	-1.365	53.9463	2.06e-13	3.72e-12	22164886	22169878
GBA3	ENSG00000249948	-5.07131	-0.294506	10.4968	0.00119578	0.00329338	22692914	22819575
GBP5	ENSG00000154451	-2.62147	5.5629	15.1754	9.8e-05	0.000371619	89258950	89272804
GBP7	ENSG00000213512	-2.7764	-1.459	26.5246	2.6e-07	1.81e-06	89131742	89176009
GC	ENSG00000145321	-9.60804	3.05155	11.8537	0.00057548	0.00173092	71741696	71804041
GCKR	ENSG00000084734	-2.74428	0.395147	13.3383	0.000260043	0.000869613	27496839	27523684
GCM1	ENSG00000137270	-4.47717	0.416452	17.2637	3.25e-05	0.000140033	53126961	53148841
GCSAML	ENSG00000169224	2.36611	-1.77065	41.9723	9.26e-11	1.18e-09	247507058	247577690
GDF10	ENSG00000266524	3.73153	-1.81042	80.152	3.47e-19	1.2e-17	47300197	47313577
GEM	ENSG00000164949	2.79253	4.56359	107.081	4.27e-25	2.34e-23	94249253	94262350
GFRA1	ENSG00000151892	3.25199	2.08178	88.4409	5.24e-21	2.16e-19	116056925	116273284
GFRA2	ENSG00000168546	2.35714	0.389631	61.4694	4.5e-15	9.98e-14	21690398	21812357
GFY	ENSG00000261949	-5.6492	-0.953796	17.0288	3.68e-05	0.0001563	49423749	49428987
GGH	ENSG00000137563	-2.00765	6.43794	18.4635	1.73e-05	8.07e-05	63014881	63039407
GGT2	ENSG00000133475	-4.66206	-0.746572	18.6979	1.53e-05	7.23e-05	21207973	21227637
GGT3P	ENSG00000197421	-5.27984	-1.45244	16.3648	5.22e-05	0.000212958	18773665	18843399
GHR	ENSG00000112964	2.30285	1.65545	60.4808	7.43e-15	1.6e-13	42423439	42721878
GINS1	ENSG00000101003	-2.16414	4.88131	73.8486	8.43e-18	2.54e-16	25407673	25452628
GJA3	ENSG00000121743	-2.46018	0.864703	13.8728	0.000195611	0.00067888	20138255	20161052
GJB7	ENSG00000164411	-2.96312	1.83737	23.6979	1.13e-06	6.85e-06	87282980	87329278
GJC2	ENSG00000198835	2.30375	1.04065	127.9	1.18e-29	8.96e-28	228149930	228159826
GLP1R	ENSG00000112164	-3.42592	-0.61038	9.55409	0.00199504	0.00513643	39048781	39091303
GLP2R	ENSG00000065325	5.24064	1.12935	232.452	1.74e-52	7.96e-50	9822206	9892099
GLRA3	ENSG00000145451	-2.67583	0.32097	15.0656	0.000103839	0.000391474	174636920	174829247
GNAL	ENSG00000141404	2.82079	3.11116	166.983	3.37e-38	4.84e-36	11689264	11885685
GNAO1	ENSG00000087258	3.61124	2.52325	160.744	7.78e-37	1.06e-34	56191390	56357444
GNAT3	ENSG00000214415	-8.79598	1.69459	8.41497	0.00372145	0.00882061	80458635	80512064
GNAZ	ENSG00000128266	2.62125	1.90972	76.7069	1.98e-18	6.35e-17	23070519	23125032
GNG4	ENSG00000168243	-2.47953	3.18242	12.2709	0.000460065	0.00142041	235547685	235650754
GNG7	ENSG00000176533	2.87337	2.31949	166.695	3.9e-38	5.56e-36	2511219	2702694
GNGT1	ENSG00000127928	-2.01327	1.11177	17.6367	2.67e-05	0.000117921	93591573	93911265
GNLY	ENSG00000115523	-2.08211	3.49167	12.6129	0.000383084	0.00121382	85685175	85698852
GP6	ENSG00000088053	-2.81109	0.390948	14.4904	0.000140873	0.000508162	55013705	55038264
GPAT2	ENSG00000186281	-2.0179	3.09589	10.5855	0.0011398	0.00315671	96021946	96039451
GPBAR1	ENSG00000179921	2.51694	0.507235	121.044	3.74e-28	2.56e-26	218259496	218263861
GPC2	ENSG00000213420	-3.44101	2.75701	40.0413	2.49e-10	2.96e-09	100169606	100177381
GPER1	ENSG00000164850	2.46387	1.23247	115.112	7.44e-27	4.68e-25	1082208	1093815
GPIHBP1	ENSG00000277494	3.11481	1.15331	128.154	1.04e-29	7.92e-28	143213218	143217170
GPM6A	ENSG00000150625	2.77404	-0.388933	50.9296	9.57e-13	1.59e-11	175632934	176002664
GPR15	ENSG00000154165	2.28125	-0.817455	26.219	3.05e-07	2.09e-06	98531978	98534681
GPR158	ENSG00000151025	-2.79523	1.66195	18.3776	1.81e-05	8.4e-05	25174802	25602229
GPR17	ENSG00000144230	2.5119	-1.64968	61.3501	4.78e-15	1.05e-13	127645864	127652639
GPR19	ENSG00000183150	-2.57873	0.736958	39.2932	3.65e-10	4.24e-09	12660890	12696207
GPR78	ENSG00000155269	-2.39131	3.15936	13.4671	0.000242779	0.000818918	8558725	8619761
GPR83	ENSG00000123901	-2.74066	-0.223159	12.4835	0.000410552	0.00128559	94377316	94401419
GPRASP1	ENSG00000198932	2.91682	2.98219	221.647	3.95e-50	1.49e-47	102651092	102659083
GPRIN1	ENSG00000169258	-2.92655	3.29507	49.0295	2.52e-12	3.96e-11	176595802	176610156
GRAMD2A	ENSG00000175318	-2.71264	2.52424	19.673	9.19e-06	4.57e-05	72159806	72197787
GRASP	ENSG00000161835	2.04128	3.4276	111.06	5.74e-26	3.37e-24	52006946	52015889
GRB14	ENSG00000115290	-2.04914	1.05789	17.7331	2.54e-05	0.000112718	164492417	164621482
GREB1L	ENSG00000141449	-3.19498	1.43417	20.384	6.34e-06	3.27e-05	21242242	21525417
GREM2	ENSG00000180875	3.00881	1.25434	57.9136	2.74e-14	5.58e-13	240489573	240612155
GRIK3	ENSG00000163873	2.52923	0.0462083	30.3671	3.58e-08	2.99e-07	36795527	37034515
GRIK5	ENSG00000105737	2.24529	1.18336	52.9024	3.51e-13	6.16e-12	41998321	42069498
GRIN1	ENSG00000176884	-2.53742	0.0203257	23.8318	1.05e-06	6.45e-06	137139154	137168756
GRIN2D	ENSG00000105464	-3.79981	4.82474	44.4231	2.65e-11	3.64e-10	48394875	48444931
GRIN3B	ENSG00000116032	-3.07926	0.0856268	36.5244	1.51e-09	1.6e-08	1000419	1009732
GRM3	ENSG00000198822	-3.79195	0.82481	12.9773	0.000315295	0.00102942	86643914	86864884
GRM4	ENSG00000124493	-3.80165	0.0804542	19.5077	1e-05	4.93e-05	34018643	34155622
GSTM5	ENSG00000134201	2.33727	2.66427	44.4442	2.62e-11	3.6e-10	109711780	109775428
GTSE1	ENSG00000075218	-2.56679	4.36808	78.2917	8.89e-19	2.96e-17	46296870	46330810
GTSF1	ENSG00000170627	-3.89917	2.98082	15.305	9.15e-05	0.000349526	54455950	54473602
GUCA1C	ENSG00000138472	6.72848	-1.7141	89.0748	3.8e-21	1.59e-19	108907792	108953879
GUCA2A	ENSG00000197273	-6.48463	2.04277	14.5362	0.000137493	0.000497932	42162690	42164745
GUCY1B2	ENSG00000123201	-2.67114	0.838123	22.6704	1.92e-06	1.11e-05	50994511	51080862
GYPC	ENSG00000136732	2.20881	3.962	70.374	4.91e-17	1.34e-15	126656133	126696667
GYS2	ENSG00000111713	2.87394	-1.64678	45.1239	1.85e-11	2.6e-10	21536107	21604847
HAAO	ENSG00000162882	2.39081	2.56487	134.372	4.53e-31	3.86e-29	42767089	42792593
HABP2	ENSG00000148702	-4.93477	0.031307	16.6655	4.46e-05	0.000185205	113550837	113589602
HAND1	ENSG00000113196	4.89477	-0.133602	75.6031	3.47e-18	1.08e-16	154474972	154478227
HAND2	ENSG00000164107	3.49767	2.26293	111.841	3.87e-26	2.3e-24	173524969	173530229
HAND2-AS1	ENSG00000237125	4.2887	1.34091	159.726	1.3e-36	1.74e-34	173527270	173659696
HAP1	ENSG00000173805	-2.74861	2.09206	20.4748	6.04e-06	3.14e-05	41717742	41734644
HAPLN1	ENSG00000145681	-2.73368	2.86054	18.2308	1.96e-05	9.02e-05	83637805	83720855
HAS1	ENSG00000105509	2.90395	1.80186	40.2388	2.25e-10	2.7e-09	51713112	51723991
HASPIN	ENSG00000177602	-2.24509	2.03259	45.817	1.3e-11	1.87e-10	3723903	3726699
HAVCR1	ENSG00000113249	-7.64568	2.47163	21.613	3.34e-06	1.84e-05	157029413	157059119
HBEGF	ENSG00000113070	2.65021	5.32886	128.7	7.89e-30	6.07e-28	140332843	140346603
HCAR1	ENSG00000196917	-2.08348	4.35705	17.8871	2.34e-05	0.000105247	122726076	122730844
HCG22	ENSG00000228789	6.81047	-0.385018	192.747	7.99e-44	1.8e-41	31053450	31059890
HDAC4	ENSG00000068024	2.08241	3.93688	175.021	5.92e-40	1.01e-37	239048168	239401654
HDC	ENSG00000140287	2.27331	0.838389	55.5412	9.15e-14	1.73e-12	50241947	50265965
HEPHL1	ENSG00000181333	-3.81085	2.90246	17.1464	3.46e-05	0.000147858	94021354	94114208
HES6	ENSG00000144485	-2.32401	4.4445	16.1037	6e-05	0.000240695	238238267	238240662
HGD	ENSG00000113924	-2.61261	-0.343813	12.7036	0.00036496	0.0011653	120628172	120682269
HHIP	ENSG00000164161	2.65127	2.48558	43.7083	3.81e-11	5.12e-10	144646156	144745271
HHIPL2	ENSG00000143512	-2.67269	0.391484	11.7996	0.000592442	0.0017761	222522258	222548104
HIC2	ENSG00000169635	-2.01272	4.55634	19.1914	1.18e-05	5.72e-05	21417371	21451463
HIF3A	ENSG00000124440	3.35174	2.36217	83.4766	6.45e-20	2.42e-18	46297042	46343433
HIST1H1B	ENSG00000184357	-6.71825	1.36768	24.4667	7.56e-07	4.79e-06	27866792	27867588
HIST1H1C	ENSG00000187837	-2.57501	6.22799	34.5696	4.11e-09	4.04e-08	26055740	26056470
HIST1H1D	ENSG00000124575	-5.74142	1.1227	31.1158	2.43e-08	2.09e-07	26234212	26234987
HIST1H1E	ENSG00000168298	-5.1744	2.30722	29.0853	6.93e-08	5.49e-07	26156329	26157115
HIST1H2AB	ENSG00000278463	-5.03382	-1.11179	15.0486	0.00010478	0.000394423	26033092	26033618
HIST1H2AD	ENSG00000196866	-5.33621	1.28104	44.5798	2.44e-11	3.38e-10	26198784	26199293
HIST1H2AE	ENSG00000277075	-3.86713	1.89856	44.0607	3.18e-11	4.33e-10	26216975	26217483
HIST1H2AG	ENSG00000196787	-3.17662	2.14432	40.7539	1.73e-10	2.11e-09	27133042	27135291
HIST1H2AH	ENSG00000274997	-6.0844	-0.0153503	20.7607	5.2e-06	2.76e-05	27147106	27147562
HIST1H2AI	ENSG00000196747	-5.51579	0.640337	35.9563	2.02e-09	2.1e-08	27808199	27808701
HIST1H2AJ	ENSG00000276368	-3.40408	-1.1777	14.7891	0.000120228	0.000442592	27814302	27814777
HIST1H2AL	ENSG00000276903	-5.3208	-0.73637	26.6735	2.41e-07	1.69e-06	27865317	27865798
HIST1H2AM	ENSG00000278677	-4.36528	-0.0959244	33.3161	7.83e-09	7.35e-08	27892699	27893185
HIST1H2BB	ENSG00000276410	-6.31775	-1.53244	10.0465	0.00152642	0.00406234	26043227	26043713
HIST1H2BC	ENSG00000180596	-3.09927	2.40885	38.8749	4.52e-10	5.18e-09	26114873	26123926
HIST1H2BD	ENSG00000158373	-2.6036	4.64358	46.8385	7.71e-12	1.14e-10	26158146	26171349
HIST1H2BE	ENSG00000274290	-4.55885	-0.478705	37.7457	8.06e-10	8.9e-09	26172059	26184655
HIST1H2BF	ENSG00000277224	-4.60044	0.0163182	36.6228	1.43e-09	1.53e-08	26199520	26200715
HIST1H2BG	ENSG00000273802	-4.02629	2.08088	40.9789	1.54e-10	1.89e-09	26215159	26216692
HIST1H2BH	ENSG00000275713	-4.39365	1.78531	43.6816	3.86e-11	5.19e-10	26251651	26253710
HIST1H2BI	ENSG00000278588	-7.09039	-0.204074	24.2756	8.35e-07	5.25e-06	26272931	26273412
HIST1H2BJ	ENSG00000124635	-3.39373	2.64045	45.2486	1.74e-11	2.46e-10	27125897	27132795
HIST1H2BL	ENSG00000185130	-4.33445	-0.636507	20.2213	6.9e-06	3.53e-05	27807444	27807931
HIST1H2BN	ENSG00000233822	-2.29686	1.28534	31.6335	1.86e-08	1.64e-07	27837760	27865798
HIST1H2BO	ENSG00000274641	-5.61233	0.152606	34.7972	3.66e-09	3.63e-08	27893425	27893891
HIST1H3A	ENSG00000275714	-3.99456	-0.950812	19.1167	1.23e-05	5.94e-05	26020451	26020958
HIST1H3D	ENSG00000197409	-3.8665	1.65516	40.4169	2.05e-10	2.47e-09	26196784	26197286
HIST1H3F	ENSG00000277775	-6.39003	0.753362	23.321	1.37e-06	8.22e-06	26250142	26250635
HIST1H3G	ENSG00000273983	-4.90694	1.5858	49.9122	1.61e-12	2.59e-11	26269405	26271815
HIST1H3H	ENSG00000278828	-3.3198	3.03367	37.323	1e-09	1.09e-08	27810064	27811300
HIST1H3I	ENSG00000275379	-6.35913	-0.889712	22.7426	1.85e-06	1.08e-05	27871845	27872346
HIST1H3J	ENSG00000197153	-4.39395	-1.79358	19.3755	1.07e-05	5.25e-05	27890315	27893106
HIST1H4A	ENSG00000278637	-4.60944	-1.49141	8.64165	0.00328563	0.00789861	26021649	26022050
HIST1H4B	ENSG00000278705	-5.73936	-0.138296	18.8556	1.41e-05	6.71e-05	26026815	26027252
HIST1H4C	ENSG00000197061	-6.06803	0.269904	23.6531	1.15e-06	7e-06	26103933	26104337
HIST1H4D	ENSG00000277157	-5.27521	0.499285	25.3096	4.88e-07	3.22e-06	26188710	26189112
HIST1H4E	ENSG00000276966	-4.91421	1.13734	34.3176	4.68e-09	4.56e-08	26204552	26206038
HIST1H4H	ENSG00000158406	-2.14718	1.63077	17.4839	2.9e-05	0.000126626	26277609	26285638
HIST1H4I	ENSG00000276180	-2.28731	3.82652	43.1904	4.97e-11	6.56e-10	27138588	27139881
HIST2H2AB	ENSG00000184270	-6.03258	0.142405	19.725	8.94e-06	4.46e-05	149887469	149887965
HIST2H2AC	ENSG00000184260	-2.73536	1.83497	23.5016	1.25e-06	7.54e-06	149886918	149887411
HIST2H2BF	ENSG00000203814	-4.07432	2.27746	49.3799	2.11e-12	3.35e-11	149782689	149812373
HIST2H3D	ENSG00000183598	-4.41573	-1.11715	23.351	1.35e-06	8.1e-06	149813225	149813693
HIST2H4A	ENSG00000270882	-2.94578	-1.1055	33.0389	9.03e-09	8.38e-08	149832659	149839767
HIST3H2A	ENSG00000181218	-2.61272	4.06276	57.1299	4.08e-14	8.14e-13	228456979	228457873
HIST3H2BB	ENSG00000196890	-3.36866	1.4524	47.7131	4.93e-12	7.49e-11	228458107	228460470
HJURP	ENSG00000123485	-2.71945	4.69118	85.8858	1.91e-20	7.53e-19	233833416	233854566
HLF	ENSG00000108924	4.54946	1.85036	306.075	1.56e-68	3.02e-65	55264960	55325187
HMCN2	ENSG00000148357	4.01825	2.87339	254.933	2.18e-57	1.81e-54	130265882	130434123
HMGA2	ENSG00000149948	-6.30829	4.41625	30.3046	3.69e-08	3.07e-07	65824460	65966291
HMGB3	ENSG00000029993	-2.01676	6.8612	74.5883	5.8e-18	1.78e-16	150980509	150990771
HMGCLL1	ENSG00000146151	2.58012	-1.04919	40.1049	2.41e-10	2.86e-09	55434373	55579197
HMMR	ENSG00000072571	-2.32201	5.05882	61.7074	3.98e-15	8.88e-14	163460203	163491941
HNF4A	ENSG00000101076	-3.85077	1.35668	12.8287	0.000341345	0.00110123	44355700	44434596
HOXB5	ENSG00000120075	-2.17065	3.27015	18.5516	1.65e-05	7.73e-05	48591257	48593961
HOXB-AS3	ENSG00000233101	-2.31367	1.09174	13.2125	0.000278093	0.000922694	48549630	48606414
HOXC11	ENSG00000123388	-2.63331	1.36031	14.2387	0.000161027	0.000571021	53973126	53977643
HOXC13	ENSG00000123364	-3.13242	2.07708	23.762	1.09e-06	6.66e-06	53938831	53946544
HOXC13-AS	ENSG00000249641	-2.01289	1.15075	9.44672	0.00211527	0.00540594	53935328	53939643
HOXC4	ENSG00000198353	-2.58238	1.98189	20.5944	5.68e-06	2.97e-05	54016931	54056030
HOXC6	ENSG00000197757	-3.20073	2.05692	29.8529	4.66e-08	3.81e-07	53990624	54030823
HOXC8	ENSG00000037965	-3.24826	0.419946	18.181	2.01e-05	9.2e-05	54008985	54012769
HOXC9	ENSG00000180806	-3.51773	1.7116	25.2735	4.97e-07	3.28e-06	53994895	54003337
HOXC-AS1	ENSG00000250451	-2.25528	-0.835613	8.53267	0.00348827	0.008319	53999022	54000010
HOXC-AS2	ENSG00000250133	-2.66427	-1.13592	15.3048	9.15e-05	0.000349526	53993810	53996785
HOXC-AS3	ENSG00000251151	-3.90467	-1.57222	12.6475	0.000376072	0.00119528	53981509	53985519
HPD	ENSG00000158104	2.00481	0.410299	36.7325	1.36e-09	1.45e-08	121839527	121863596
HPDL	ENSG00000186603	-2.50367	2.0554	19.5743	9.68e-06	4.78e-05	45326895	45328679
HPSE2	ENSG00000172987	3.49295	2.55445	67.3174	2.31e-16	5.92e-15	98457077	99235862
HRASLS2	ENSG00000133328	-2.45673	2.01821	9.81776	0.00172834	0.00452625	63552770	63563379
HRG	ENSG00000113905	-5.09792	-1.3059	10.0522	0.00152168	0.0040523	186660216	186678234
HS3ST3A1	ENSG00000153976	-2.22838	0.655507	10.0821	0.00149719	0.00399561	13494032	13601929
HSD17B1	ENSG00000108786	-2.45916	3.68691	24.0847	9.22e-07	5.74e-06	42552922	42555214
HSD17B3	ENSG00000130948	-2.43903	0.676262	15.9488	6.51e-05	0.00025906	96235306	96302176
HSD17B6	ENSG00000025423	2.53848	2.83529	98.6366	3.03e-23	1.45e-21	56752161	56787790
HSD3B1	ENSG00000203857	-7.03063	2.31132	16.7188	4.33e-05	0.000180589	119507198	119515054
HSPB2	ENSG00000170276	2.79323	-0.130015	134.751	3.74e-31	3.23e-29	111912734	111914093
HSPB6	ENSG00000004776	4.61053	5.53584	200.152	1.94e-45	4.94e-43	35754566	35758079
HSPB7	ENSG00000173641	3.99152	4.34767	137.4	9.86e-32	9.16e-30	16014028	16019594
HSPB8	ENSG00000152137	2.73986	6.34125	81.3614	1.88e-19	6.71e-18	119171555	119224855
HTR1B	ENSG00000135312	2.92044	-1.54499	58.9952	1.58e-14	3.31e-13	77460924	77463491
HTR2C	ENSG00000147246	-2.57642	1.2888	13.3218	0.000262334	0.000875253	114584078	114910061
HYAL4	ENSG00000106302	-3.05093	-0.379109	12.3794	0.00043409	0.00135102	123828983	123877481
IBSP	ENSG00000029559	-5.708	1.72611	31.3952	2.11e-08	1.83e-07	87799554	87812435
ICAM5	ENSG00000105376	-2.13332	1.32934	17.8574	2.38e-05	0.000106708	10289952	10296778
IDO1	ENSG00000131203	-2.2603	5.74786	9.71491	0.00182779	0.004758	39902275	39928790
IER3	ENSG00000137331	2.28618	6.39062	102.892	3.54e-24	1.79e-22	30743199	30744548
IFI27	ENSG00000165949	-2.05635	8.33244	16.9379	3.86e-05	0.000163246	94104836	94116698
IFI6	ENSG00000126709	-2.60274	8.32827	26.6473	2.44e-07	1.71e-06	27666064	27672198
IFNG	ENSG00000111537	-2.32392	0.323963	8.71027	0.00316422	0.00765546	68154768	68159740
IFNK	ENSG00000147896	-6.45068	-0.57553	10.3289	0.00130962	0.00356174	27524314	27526498
IGDCC3	ENSG00000174498	-3.67647	1.73603	13.3421	0.000259519	0.000868695	65327127	65378002
IGF2	ENSG00000167244	-2.74406	11.1369	11.0443	0.000889587	0.00254235	2129112	2141238
IGF2-AS	ENSG00000099869	-2.58417	0.903295	9.81006	0.0017356	0.00454251	2140501	2148666
IGF2BP1	ENSG00000159217	-4.9188	3.19752	16.8126	4.13e-05	0.000173145	48997385	49056145
IGF2BP2	ENSG00000073792	-2.41118	4.94971	17.2314	3.31e-05	0.000142119	185643130	185825042
IGF2BP3	ENSG00000136231	-4.72415	2.88098	31.5949	1.9e-08	1.67e-07	23310209	23470491
IGFL1	ENSG00000188293	-4.01722	5.79243	14.9948	0.000107808	0.000403897	46229742	46231243
IGFL2	ENSG00000204866	-7.34149	2.81981	33.6451	6.61e-09	6.28e-08	46143106	46161299
IGFL4	ENSG00000204869	-5.79911	-1.17618	31.6978	1.8e-08	1.59e-07	46039748	46077118
IGSF10	ENSG00000152580	3.44325	1.70547	85.6381	2.16e-20	8.44e-19	151425384	151458709
IGSF9	ENSG00000085552	-2.23903	5.95352	28.1623	1.12e-07	8.45e-07	159927039	159945613
IGSF9B	ENSG00000080854	3.85501	0.0307892	165.381	7.55e-38	1.06e-35	133896438	133956968
IL12RB2	ENSG00000081985	-2.13072	1.38864	12.2922	0.000454862	0.00140735	67307364	67398724
IL36G	ENSG00000136688	-3.35492	1.83068	10.9578	0.000932085	0.00264842	112973203	112985658
IL37	ENSG00000125571	-6.42575	-0.598945	34.8868	3.49e-09	3.48e-08	112912971	112918882
IL6	ENSG00000136244	3.15576	4.03517	67.5987	2e-16	5.17e-15	22725884	22732002
ILK	ENSG00000166333	2.21959	3.31667	194.772	2.89e-44	6.61e-42	6603708	6610874
INA	ENSG00000148798	-2.04309	5.54017	9.33405	0.00224934	0.00569995	103277138	103290346
INHA	ENSG00000123999	-2.5851	0.658458	19.8766	8.26e-06	4.16e-05	219569162	219575711
INHBA	ENSG00000122641	-2.70979	6.0613	26.9918	2.04e-07	1.46e-06	41667168	41705834
INMT	ENSG00000241644	2.34791	2.18892	97.1816	6.33e-23	2.95e-21	30697985	30757602
IQGAP3	ENSG00000183856	-2.30884	5.57298	53.6597	2.38e-13	4.27e-12	156525405	156572604
ISG15	ENSG00000187608	-2.32221	7.71298	33.0875	8.81e-09	8.2e-08	1001138	1014540
ISL2	ENSG00000159556	-2.31148	0.953162	36.3082	1.68e-09	1.78e-08	76336773	76342475
ITGA5	ENSG00000161638	2.13541	7.36018	70.9178	3.72e-17	1.04e-15	54395261	54419266
ITGA7	ENSG00000135424	2.74552	4.85644	111.595	4.38e-26	2.58e-24	55684568	55716043
ITGA8	ENSG00000077943	3.22516	3.67398	198.918	3.6e-45	8.93e-43	15513954	15719922
ITGA9	ENSG00000144668	2.18722	3.63666	105.789	8.2e-25	4.41e-23	37452115	37823507
ITGB1BP2	ENSG00000147166	2.64306	0.931173	201.93	7.92e-46	2.12e-43	71301750	71305371
ITGB3	ENSG00000259207	2.45443	1.41909	66.7477	3.09e-16	7.84e-15	47253827	47313743
ITIH2	ENSG00000151655	-2.39161	0.184461	12.3321	0.000445236	0.00138126	7703316	7749520
ITIH5	ENSG00000123243	3.16938	5.06627	159.804	1.25e-36	1.68e-34	7559270	7666998
ITIH6	ENSG00000102313	-3.14681	-1.0074	23.5442	1.22e-06	7.38e-06	54748918	54798255
ITLN1	ENSG00000179914	-5.62155	5.56502	12.2075	0.000475989	0.0014623	160876540	160885180
ITLN2	ENSG00000158764	-3.42361	0.403044	8.63767	0.00329283	0.00791372	160945025	160954809
ITPKB	ENSG00000143772	2.14491	5.28588	238.32	9.14e-54	5.12e-51	226631690	226739323
ITPR1	ENSG00000150995	2.43752	4.95372	138.242	6.45e-32	6.09e-30	4493345	4847840
IYD	ENSG00000009765	-2.81461	1.26301	11.3475	0.000755501	0.00220322	150368892	150405969
JAM2	ENSG00000154721	2.51882	3.07627	140.355	2.23e-32	2.14e-30	25639258	25717562
JAM3	ENSG00000166086	2.48172	4.71287	124.352	7.06e-29	5.11e-27	134069071	134152001
JAZF1	ENSG00000153814	2.07874	3.57063	112.938	2.23e-26	1.34e-24	27830573	28180795
JPH2	ENSG00000149596	3.39352	4.1611	136.055	1.94e-31	1.72e-29	44106590	44187188
KANK2	ENSG00000197256	2.66987	6.41084	197.278	8.2e-45	1.98e-42	11164270	11197791
KANK4	ENSG00000132854	-2.93652	1.86738	11.6534	0.000640848	0.00190381	62236165	62319434
KCNA5	ENSG00000130037	3.52511	-0.82623	146.289	1.12e-33	1.17e-31	5043879	5046788
KCNB1	ENSG00000158445	5.05121	0.645867	208.44	3.01e-47	8.86e-45	49293394	49484297
KCNC3	ENSG00000131398	-2.17328	3.10203	27.1077	1.92e-07	1.39e-06	50311937	50333515
KCND3	ENSG00000171385	2.78771	2.96835	82.9648	8.35e-20	3.1e-18	111770662	111989668
KCNE4	ENSG00000152049	3.12722	3.23103	151.034	1.03e-34	1.16e-32	223051814	223198399
KCNG1	ENSG00000026559	-2.9661	5.36356	23.1099	1.53e-06	9.09e-06	51003656	51023107
KCNH2	ENSG00000055118	2.84395	2.92021	55.5871	8.94e-14	1.7e-12	150944961	150978321
KCNH6	ENSG00000173826	-8.09333	2.25603	10.1976	0.00140621	0.00378474	63523334	63548977
KCNJ3	ENSG00000162989	3.11408	-1.25339	24.6081	7.03e-07	4.48e-06	154697855	154858354
KCNJ6	ENSG00000157542	-2.98888	-1.5845	15.0339	0.000105596	0.00039715	37607373	38121345
KCNK12	ENSG00000184261	-2.05277	-0.0928586	8.68962	0.00320027	0.00772333	47509290	47570985
KCNK13	ENSG00000152315	-3.00016	1.25455	24.4524	7.62e-07	4.82e-06	90061994	90185853
KCNK2	ENSG00000082482	2.2648	-0.366989	22.7534	1.84e-06	1.07e-05	215005775	215237090
KCNK3	ENSG00000171303	2.95831	1.95743	67.5349	2.07e-16	5.34e-15	26692690	26733420
KCNK9	ENSG00000169427	-3.12821	-0.171438	15.004	0.000107282	0.000402361	139600838	139704109
KCNMA1	ENSG00000156113	3.78346	3.97687	224.71	8.49e-51	3.51e-48	76869601	77638369
KCNMB1	ENSG00000145936	3.68752	3.86825	183.455	8.53e-42	1.54e-39	170374671	170389634
KCNN2	ENSG00000080709	2.51978	0.404753	76.9361	1.77e-18	5.67e-17	114055926	114496500
KCNQ4	ENSG00000117013	3.00944	1.61919	131.96	1.53e-30	1.25e-28	40783787	40840452
KCNS1	ENSG00000124134	-2.90825	1.59713	21.1035	4.35e-06	2.35e-05	45091214	45101127
KCTD16	ENSG00000183775	-2.26947	0.619818	11.6014	0.00065903	0.00195181	144170873	144485686
KIF12	ENSG00000136883	-3.21895	1.77466	20.4181	6.22e-06	3.22e-05	114086126	114099291
KIF14	ENSG00000118193	-2.33111	4.49646	56.9678	4.43e-14	8.8e-13	200551497	200620751
KIF15	ENSG00000163808	-2.23195	4.20863	62.8484	2.23e-15	5.1e-14	44761721	44873376
KIF18A	ENSG00000121621	-2.42193	3.89192	64.6537	8.93e-16	2.16e-14	28020619	28108156
KIF18B	ENSG00000186185	-3.10036	4.86447	93.5235	4.01e-22	1.79e-20	44924709	44947773
KIF20A	ENSG00000112984	-2.09816	5.39193	50.1495	1.42e-12	2.32e-11	138178719	138187723
KIF23	ENSG00000137807	-2.02485	5.2617	61.1133	5.39e-15	1.18e-13	69414246	69448427
KIF26B	ENSG00000162849	-2.94182	4.54467	47.1595	6.54e-12	9.79e-11	245154985	245709432
KIF2C	ENSG00000142945	-2.39245	5.63015	76.6509	2.04e-18	6.5e-17	44739818	44767767
KIF4A	ENSG00000090889	-2.42581	5.15118	70.4858	4.64e-17	1.27e-15	70290104	70420886
KIFC1	ENSG00000237649	-2.0464	5.50521	55.7668	8.16e-14	1.55e-12	33391823	33409896
KIRREL2	ENSG00000126259	-2.93561	-0.756485	10.8413	0.000992619	0.00279342	35855861	35867136
KISS1	ENSG00000170498	-3.62411	2.26868	18.1761	2.01e-05	9.21e-05	204190341	204196491
KISS1R	ENSG00000116014	-3.86202	-0.436621	20.9886	4.62e-06	2.48e-05	917287	921005
KLC3	ENSG00000104892	-2.06351	3.63253	17.8803	2.35e-05	0.000105569	45333434	45351520
KLF14	ENSG00000266265	-3.15926	-1.21588	12.6662	0.000372323	0.00118554	130730697	130734207
KLF17	ENSG00000171872	4.20214	-1.46742	71.3963	2.92e-17	8.22e-16	44118821	44135140
KLF2	ENSG00000127528	3.08699	4.57037	245.684	2.27e-55	1.58e-52	16324826	16328685
KLF4	ENSG00000136826	2.42594	5.55047	118.92	1.09e-27	7.23e-26	107484852	107490482
KLF9	ENSG00000119138	2.43272	5.1522	133.224	8.08e-31	6.75e-29	70384597	70414624
KLHDC7B	ENSG00000130487	-3.75223	7.00923	24.7267	6.61e-07	4.24e-06	50545899	50551023
KLHL30	ENSG00000168427	2.54419	0.297645	81.4253	1.82e-19	6.51e-18	238138668	238152947
KLHL35	ENSG00000149243	-2.35783	1.51919	35.5433	2.49e-09	2.56e-08	75422394	75433203
KLHL38	ENSG00000175946	2.06327	-1.70183	24.0697	9.29e-07	5.77e-06	123645527	123652950
KLHL41	ENSG00000239474	4.6094	0.178983	397.455	1.97e-88	1.14e-84	169509702	169526258
KLK11	ENSG00000167757	2.49073	2.96637	14.3692	0.000150242	0.000538046	51022216	51028039
KLK12	ENSG00000186474	4.26306	1.09499	27.8123	1.34e-07	9.93e-07	51029092	51035230
KLK13	ENSG00000167759	4.39395	2.62771	51.6595	6.6e-13	1.13e-11	51055626	51065114
KLK2	ENSG00000167751	-6.92261	1.86815	10.5314	0.00117362	0.00324159	50861568	50880567
KLK4	ENSG00000167749	-4.20381	0.330811	10.4729	0.0012114	0.00332901	50906352	50910738
KLRB1	ENSG00000111796	2.02528	1.85974	52.5461	4.2e-13	7.33e-12	9594551	9607916
KREMEN2	ENSG00000131650	-3.08274	2.08812	31.3057	2.2e-08	1.91e-07	2964216	2968383
KRT12	ENSG00000187242	-3.14424	-0.077858	14.0346	0.000179481	0.00062889	40861303	40867223
KRT14	ENSG00000186847	-4.75222	9.4934	18.2192	1.97e-05	9.06e-05	41582279	41586895
KRT18P55	ENSG00000265480	-3.11886	-1.6377	26.8711	2.17e-07	1.54e-06	28275986	28317783
KRT33A	ENSG00000006059	-3.2341	1.71192	8.72737	0.00313468	0.00759563	41346092	41350828
KRT33B	ENSG00000131738	-3.54252	0.595377	12.8641	0.000334938	0.00108317	41363498	41369813
KRT34	ENSG00000131737	-4.17466	0.852093	11.072	0.000876406	0.00251087	41377650	41382403
KRT38	ENSG00000171360	-9.08407	0.580472	9.31726	0.00227006	0.00574993	41436154	41440983
KRT39	ENSG00000196859	-5.38255	-0.914636	10.9371	0.000942554	0.00267306	40958417	40966948
KRT4	ENSG00000170477	2.9398	7.47258	25.4566	4.52e-07	3e-06	52806549	52814116
KRT40	ENSG00000204889	-4.54989	0.00637517	12.7861	0.000349199	0.00112157	40977716	40987135
KRT74	ENSG00000170484	-3.35727	-0.969846	9.85702	0.00169185	0.00444474	52565782	52573843
KRT78	ENSG00000170423	3.3581	1.79978	60.7924	6.34e-15	1.37e-13	52837804	52849092
KRT79	ENSG00000185640	-6.6793	3.0915	22.9057	1.7e-06	1e-05	52821408	52834311
KRT81	ENSG00000205426	-7.18343	5.32555	28.4594	9.57e-08	7.36e-07	52285913	52291534
KRT83	ENSG00000170523	-3.5816	0.16014	11.7119	0.000621002	0.0018515	52314301	52321398
KRT86	ENSG00000170442	-2.7753	3.13776	17.2018	3.36e-05	0.000144065	52249300	52309163
KRT9	ENSG00000171403	-3.82372	0.749817	20.2376	6.84e-06	3.51e-05	41565836	41572059
KRTAP2-3	ENSG00000212724	-4.83544	-1.53838	9.01648	0.00267556	0.00663014	41059240	41060114
KRTAP4-1	ENSG00000198443	-3.13605	0.0593722	29.6818	5.09e-08	4.14e-07	41184102	41185342
KSR2	ENSG00000171435	-2.23888	2.56876	12.4161	0.000425639	0.00132686	117453012	117968990
KY	ENSG00000174611	3.55446	-1.53956	114.012	1.3e-26	8.04e-25	134599923	134651636
LAMA1	ENSG00000101680	-2.0312	3.20971	10.9141	0.000954336	0.0027025	6941742	7117797
LAMA2	ENSG00000196569	2.33465	4.45298	103.968	2.06e-24	1.08e-22	128883138	129516566
LAMC2	ENSG00000058085	-2.79543	8.37852	21.1854	4.17e-06	2.26e-05	183186238	183245127
LAMC3	ENSG00000050555	2.72542	4.29519	136.835	1.31e-31	1.19e-29	131009174	131094473
LAMP5	ENSG00000125869	-2.5772	1.90291	17.921	2.3e-05	0.000103547	9514358	9530524
LBP	ENSG00000129988	-4.0024	1.66257	15.5987	7.83e-05	0.000305284	38346482	38377013
LBX2	ENSG00000179528	-2.72135	0.77137	75.5877	3.5e-18	1.09e-16	74497517	74503316
LCMT1-AS2	ENSG00000260034	-3.75318	-0.0775299	13.6943	0.000215102	0.000736332	25140577	25149032
LCN12	ENSG00000184925	-2.36505	0.518989	20.8973	4.85e-06	2.59e-05	136949551	136955497
LCN15	ENSG00000177984	-6.82033	0.577121	8.91244	0.00283235	0.00696405	136759634	136766255
LCTL	ENSG00000188501	-2.07013	-1.34671	32.3642	1.28e-08	1.16e-07	66547179	66565979
LDB3	ENSG00000122367	2.85611	1.5519	110.622	7.16e-26	4.16e-24	86668507	86736072
LDLRAD2	ENSG00000187942	2.81343	0.848766	284.982	6.17e-64	8.24e-61	21812265	21825225
LEMD1	ENSG00000186007	-4.65435	0.503692	20.7729	5.17e-06	2.74e-05	205381378	205455954
LEXM	ENSG00000162398	3.70469	-1.12636	95.7073	1.33e-22	6.12e-21	54806063	54842252
LGI4	ENSG00000153902	2.37214	2.12826	114.201	1.18e-26	7.33e-25	35124513	35142451
LGR5	ENSG00000139292	-3.50029	1.67715	16.9883	3.76e-05	0.000159369	71439798	71586310
LHB	ENSG00000104826	-3.05182	-0.929691	35.3913	2.7e-09	2.75e-08	49015980	49017091
LHX1	ENSG00000273706	-5.1445	0.500354	15.2209	9.56e-05	0.000363453	36936785	36944612
LHX2	ENSG00000106689	-2.63125	-0.169628	9.50421	0.00205001	0.00525889	124001670	124033301
LHX5	ENSG00000089116	-5.35707	0.437819	37.3302	9.97e-10	1.09e-08	113462033	113472280
LHX9	ENSG00000143355	-3.52591	-0.628862	16.6674	4.45e-05	0.000185149	197911902	197935478
LIMS2	ENSG00000072163	3.39761	4.85069	238.397	8.8e-54	5.09e-51	127638381	127681786
LIN28A	ENSG00000131914	-7.9641	-0.0110662	12.0538	0.000516859	0.00157202	26410817	26429728
LINC00163	ENSG00000234880	3.46885	-1.41607	38.0867	6.77e-10	7.58e-09	44989864	44994086
LINC00462	ENSG00000233610	-4.54531	-1.44061	9.33832	0.00224412	0.00568837	48576974	48578088
LINC00525	ENSG00000146666	-3.17549	-0.0481282	31.1511	2.39e-08	2.06e-07	47761476	47766772
LINC00543	ENSG00000260704	-2.51913	-0.872949	10.8838	0.00097011	0.00273869	27953526	27955370
LINC00634	ENSG00000205704	-3.39392	-1.22652	43.905	3.45e-11	4.66e-10	41952174	41958933
LINC00664	ENSG00000268658	-2.00892	0.154474	13.03	0.000306536	0.0010027	21483374	21503238
LINC00704	ENSG00000231298	-3.56828	1.19479	15.7793	7.12e-05	0.000280644	4650158	4678185
LINC00839	ENSG00000185904	-2.53178	3.02514	20.0632	7.49e-06	3.81e-05	42475480	42495337
LINC00853	ENSG00000224805	-2.08679	-0.701222	28.2816	1.05e-07	8e-07	47179250	47180339
LINC00858	ENSG00000229404	-3.89661	-0.25174	17.7219	2.56e-05	0.000113301	84267747	84294659
LINC00865	ENSG00000232229	2.23537	3.02103	91.9929	8.7e-22	3.84e-20	89829483	89840861
LINC00896	ENSG00000236499	-3.27934	-0.394076	34.9502	3.38e-09	3.38e-08	20206397	20208524
LINC00941	ENSG00000235884	-2.20378	1.23066	14.2458	0.000160419	0.000569152	30755167	30802602
LINC00967	ENSG00000253138	-7.0779	2.76614	15.8084	7.01e-05	0.00027692	66192093	66197315
LINC01068	ENSG00000227676	-2.5275	-1.37647	17.9003	2.33e-05	0.000104571	79566678	79571445
LINC01082	ENSG00000269186	4.09886	-0.172927	202.115	7.22e-46	1.96e-43	86195954	86199720
LINC01122	ENSG00000233723	-3.99203	-0.314104	9.28539	0.00230989	0.00583975	58427799	59063766
LINC01134	ENSG00000236423	-2.33589	-0.0715158	24.4277	7.71e-07	4.87e-06	3900352	3917225
LINC01146	ENSG00000258867	-2.35054	-1.68475	11.0906	0.000867664	0.00248857	88024519	88098025
LINC01213	ENSG00000244541	-2.04422	0.901449	10.766	0.00103379	0.00289682	150238519	150244232
LINC01224	ENSG00000269416	-2.40148	1.7513	12.0271	0.000524317	0.00159191	23399233	23416075
LINC01225	ENSG00000260386	-3.72464	-1.72802	14.5922	0.000133467	0.000485472	31500085	31509648
LINC01234	ENSG00000249550	-4.73799	2.1645	20.9972	4.6e-06	2.47e-05	113583886	113773726
LINC01287	ENSG00000234722	-7.1948	1.06122	13.6235	0.000223377	0.000760313	153355365	153413985
LINC01354	ENSG00000231768	2.10284	-1.12409	51.5422	7.01e-13	1.19e-11	234527887	234531803
LINC01356	ENSG00000215866	-4.3951	0.44192	16.787	4.18e-05	0.000175012	112820170	112850643
LINC01361	ENSG00000236268	-2.30061	-1.3942	10.6276	0.0011141	0.00309489	82970820	82986208
LINC01411	ENSG00000249306	-2.22447	-1.41943	8.72257	0.00314295	0.00761037	174336295	174532457
LINC01419	ENSG00000253898	-6.25386	1.81454	8.72641	0.00313633	0.00759855	83403758	83408900
LINC01426	ENSG00000234380	-2.32605	0.788323	18.3607	1.83e-05	8.47e-05	34745757	34784886
LINC01456	ENSG00000225882	-5.2692	-1.29849	13.2802	0.000268221	0.000893521	17970197	18104644
LINC01460	ENSG00000205334	-2.56548	-1.70452	9.41219	0.00215548	0.00549899	27705786	27715732
LINC01468	ENSG00000231131	-7.73979	-0.702569	22.9969	1.62e-06	9.57e-06	52450874	52755507
LINC01541	ENSG00000260676	-8.0923	1.82473	9.97418	0.00158751	0.00420327	71519962	71578956
LINC01561	ENSG00000177234	-3.95973	-1.678	16.6635	4.46e-05	0.000185304	120597949	120600124
LINC01602	ENSG00000205293	-7.04743	-0.874359	14.1436	0.000169368	0.000597673	57855500	57984126
LINC01607	ENSG00000272138	-2.04225	-1.01594	17.7938	2.46e-05	0.000109636	79768110	79802842
LINC01615	ENSG00000223485	-3.24366	1.25421	21.1764	4.19e-06	2.27e-05	169157162	169162992
LINC01633	ENSG00000260976	-2.71341	-1.0246	28.3103	1.03e-07	7.9e-07	184999710	185008789
LINC02015	ENSG00000231574	-4.08792	0.242952	18.7557	1.49e-05	7.03e-05	177816865	177899224
LIPG	ENSG00000101670	-2.78126	5.0891	29.4103	5.86e-08	4.71e-07	49560699	49599185
LIPK	ENSG00000204021	-3.05275	-0.275261	9.0722	0.00259525	0.00645229	88724544	88752756
LMO3	ENSG00000048540	3.16659	4.07142	94.6293	2.3e-22	1.04e-20	16548372	16610594
LMOD1	ENSG00000163431	3.6786	6.30348	136.986	1.21e-31	1.12e-29	201896456	201946588
LMOD3	ENSG00000163380	3.72463	-1.17944	300.02	3.26e-67	4.72e-64	69106065	69123032
LMX1B	ENSG00000136944	-2.67761	-0.257214	8.69582	0.00318941	0.00770353	126613928	126701032
LONRF2	ENSG00000170500	2.68538	2.45031	43.0334	5.38e-11	7.08e-10	100271875	100322501
LPP	ENSG00000145012	2.02917	7.46949	136.006	1.99e-31	1.75e-29	188153284	188890671
LRAT	ENSG00000121207	-2.82024	1.30182	8.99582	0.00270598	0.00669215	154626945	154753120
LRCH2	ENSG00000130224	2.25939	2.48286	78.6832	7.29e-19	2.46e-17	115110616	115234096
LRFN2	ENSG00000156564	-2.95343	0.755277	12.5597	0.000394156	0.00124299	40391591	40587364
LRFN5	ENSG00000165379	3.12984	1.16912	74.7646	5.3e-18	1.63e-16	41607570	41904549
LRGUK	ENSG00000155530	-2.52193	-0.0913428	34.6299	3.99e-09	3.93e-08	134127299	134264591
LRP2	ENSG00000081479	-3.58371	0.622538	20.3827	6.34e-06	3.27e-05	169127109	169362534
LRRC15	ENSG00000172061	-3.38492	4.06808	18.9427	1.35e-05	6.44e-05	194355249	194369743
LRRC19	ENSG00000184434	-2.51581	-0.760187	10.8141	0.0010073	0.00282941	26993136	27005672
LRRC2	ENSG00000163827	3.78665	-0.155281	136.92	1.26e-31	1.15e-29	46515385	46580099
LRRC31	ENSG00000114248	-3.40374	-1.13947	16.2162	5.65e-05	0.00022813	169839172	169869935
LRRC3B	ENSG00000179796	5.34456	-1.62573	94.1485	2.93e-22	1.32e-20	26622806	26717537
LRRC46	ENSG00000141294	-2.11178	0.959633	56.8304	4.75e-14	9.4e-13	47831634	47837719
LRRC4B	ENSG00000131409	2.18149	1.44889	55.0203	1.19e-13	2.23e-12	50516892	50568435
LRRIQ4	ENSG00000188306	-2.62806	-0.342082	17.5218	2.84e-05	0.000124347	169821922	169837775
LRRK2	ENSG00000188906	2.1905	2.87789	79.0946	5.92e-19	2.01e-17	40196744	40369285
LRRN4	ENSG00000125872	-3.52567	-0.990914	22.0083	2.71e-06	1.53e-05	6040546	6054060
LRRN4CL	ENSG00000177363	2.9746	1.58514	157.024	5.06e-36	6.37e-34	62686406	62689530
LSAMP-AS1	ENSG00000240922	-2.94926	-1.61884	8.16443	0.00427198	0.00994907	116360024	116370090
LTBP4	ENSG00000090006	2.55287	6.85436	152.715	4.42e-35	5.23e-33	40592883	40629818
LYPD1	ENSG00000150551	-2.21857	1.22888	19.4099	1.05e-05	5.16e-05	132643286	132671579
LYPD8	ENSG00000259823	-3.39062	-0.35346	10.7368	0.00105027	0.00293682	248739415	248755759
LYVE1	ENSG00000133800	2.41686	3.16529	44.2167	2.94e-11	4.02e-10	10556966	10611689
M1AP	ENSG00000159374	-2.47106	0.491284	11.6498	0.000642107	0.0019069	74557883	74648338
MAB21L2	ENSG00000181541	2.83213	-1.69485	12.7365	0.000358582	0.00114835	150582151	150584693
MAGEA11	ENSG00000185247	-5.0957	1.99777	16.9876	3.76e-05	0.000159377	149688228	149717268
MAGEA4	ENSG00000147381	-4.46948	4.62802	10.0616	0.00151394	0.00403533	151912509	151925170
MAGEA9B	ENSG00000267978	-3.63592	1.36689	8.42451	0.00370196	0.00878125	149581653	149587453
MAGEB17	ENSG00000182798	-4.13625	-1.44416	9.40283	0.00216651	0.00552145	16167481	16171464
MAGEB2	ENSG00000099399	-6.74809	1.39708	11.8885	0.000564825	0.00170359	30215563	30220089
MAGEC1	ENSG00000155495	-6.28899	1.24391	11.8773	0.00056823	0.00171119	141903894	141909374
MAMDC2	ENSG00000165072	3.34233	2.77304	123.705	9.77e-29	6.99e-27	70043848	70226972
MAOB	ENSG00000069535	3.0225	3.96951	79.0874	5.94e-19	2.01e-17	43766610	43882450
MAP1A	ENSG00000166963	3.1149	4.31184	149.085	2.75e-34	2.98e-32	43510958	43531620
MAP1B	ENSG00000131711	2.73077	5.72673	103.601	2.47e-24	1.28e-22	72107234	72209565
MAPK15	ENSG00000181085	-3.00055	3.37207	36.7366	1.35e-09	1.45e-08	143716340	143722458
MAPK4	ENSG00000141639	2.53635	1.8853	31.4274	2.07e-08	1.81e-07	50560087	50731826
MAPK8IP2	ENSG00000008735	-2.38134	3.32611	21.5587	3.43e-06	1.89e-05	50600793	50613981
MAPT	ENSG00000186868	2.80615	2.42888	85.7637	2.03e-20	7.95e-19	45894551	46028334
MASP1	ENSG00000127241	2.67522	1.36472	62.2555	3.02e-15	6.79e-14	187217282	187291980
MAST1	ENSG00000105613	-2.18461	1.89115	25.3478	4.79e-07	3.17e-06	12833951	12874952
MATN2	ENSG00000132561	2.11879	5.83611	51.6052	6.79e-13	1.16e-11	97868840	98036724
MATN3	ENSG00000132031	-2.43761	2.28857	40.8064	1.68e-10	2.05e-09	19992052	20012668
MBNL1-AS1	ENSG00000229619	3.63706	2.7753	300.596	2.44e-67	3.86e-64	152245262	152269557
MCIDAS	ENSG00000234602	-2.58404	0.736116	33.8136	6.07e-09	5.78e-08	55219564	55227315
MCM10	ENSG00000065328	-2.23669	4.15233	50.2828	1.33e-12	2.17e-11	13161558	13211110
MEDAG	ENSG00000102802	2.3639	3.44282	52.3569	4.63e-13	8.04e-12	30906271	30925572
MEF2C-AS1	ENSG00000248309	3.11752	-1.54262	107.989	2.7e-25	1.51e-23	88883328	89466398
MEG9	ENSG00000223403	2.07135	-1.85038	20.1356	7.21e-06	3.68e-05	101068283	101072937
MEGF11	ENSG00000157890	-2.07205	-0.564042	12.2444	0.000466651	0.00143819	65895079	66253747
MELK	ENSG00000165304	-2.52075	5.04462	57.8867	2.78e-14	5.65e-13	36572862	36677683
MELTF	ENSG00000163975	-2.5371	4.98989	21.9373	2.82e-06	1.58e-05	196988621	197029817
MEOX1	ENSG00000005102	2.40933	1.56279	63.5007	1.6e-15	3.74e-14	43640389	43661922
MEP1A	ENSG00000112818	-4.64322	-0.0233574	17.2915	3.21e-05	0.000138279	46793389	46839782
MESP1	ENSG00000166823	-2.3385	2.63245	13.1346	0.000289886	0.000956526	89748661	89751310
MEST	ENSG00000106484	-2.57104	6.28714	27.6175	1.48e-07	1.09e-06	130486171	130506465
METTL24	ENSG00000053328	4.09411	-1.04964	170.33	6.27e-39	9.81e-37	110245928	110358272
METTL7B	ENSG00000170439	-2.55513	2.27474	20.1243	7.26e-06	3.7e-05	55681678	55684611
MEX3A	ENSG00000254726	-2.57729	5.40801	31.8205	1.69e-08	1.5e-07	156072013	156082465
MFAP4	ENSG00000166482	3.11815	6.24225	110.836	6.43e-26	3.75e-24	19383442	19387190
MFAP5	ENSG00000197614	2.24675	4.15339	23.7069	1.12e-06	6.83e-06	8637346	8662888
MGAM	ENSG00000257335	-2.44236	1.70117	11.3327	0.000761536	0.00221849	141907813	142106747
MGARP	ENSG00000137463	2.39444	-1.60938	71.2629	3.13e-17	8.76e-16	139266165	139280225
MICB	ENSG00000204516	-2.1728	3.30041	34.4762	4.31e-09	4.23e-08	31494881	31511124
MICU3	ENSG00000155970	3.00171	1.04021	192.594	8.63e-44	1.9e-41	17027238	17122642
MIOX	ENSG00000100253	-4.69626	-0.939391	34.6793	3.89e-09	3.84e-08	50486784	50490648
MKI67	ENSG00000148773	-2.10218	7.13633	54.6465	1.44e-13	2.66e-12	128096659	128126423
MKRN2OS	ENSG00000225526	-2.08414	2.80974	25.8269	3.73e-07	2.52e-06	12514934	12561059
MKRN3	ENSG00000179455	-3.5302	1.20733	12.8003	0.00034657	0.00111461	23565674	23630075
MKX	ENSG00000150051	3.4993	0.6713	109.661	1.16e-25	6.64e-24	27672874	27746060
MMP1	ENSG00000196611	-2.9172	7.19463	15.584	7.89e-05	0.000307326	102789919	102798160
MMP11	ENSG00000099953	-5.21157	7.62865	53.3177	2.84e-13	5.04e-12	23768226	23784316
MMP13	ENSG00000137745	-3.97658	6.11745	19.5797	9.65e-06	4.78e-05	102942995	102955732
MMP9	ENSG00000100985	-2.43059	6.35276	13.2099	0.000278471	0.00092377	46008908	46016561
MMRN1	ENSG00000138722	2.80218	2.57835	75.6362	3.41e-18	1.07e-16	89879532	89954629
MNX1	ENSG00000130675	-3.89883	1.13134	43.1663	5.03e-11	6.63e-10	156994051	157010663
MNX1-AS1	ENSG00000243479	-3.32542	1.13966	25.9565	3.49e-07	2.37e-06	157010805	157016426
MORN3	ENSG00000139714	-2.02234	1.72241	22.0239	2.69e-06	1.51e-05	121648742	121672631
MPZ	ENSG00000158887	2.23783	1.41751	108.676	1.91e-25	1.07e-23	161304735	161309968
MRGPRF	ENSG00000172935	3.32075	4.34778	167.394	2.74e-38	3.97e-36	69004395	69013382
MRVI1	ENSG00000072952	2.71389	5.05748	121.063	3.7e-28	2.54e-26	10573091	10693988
MS4A15	ENSG00000166961	-7.22128	1.64799	16.7739	4.21e-05	0.000175922	60756867	60776733
MS4A2	ENSG00000149534	2.1081	1.16648	50.2804	1.33e-12	2.17e-11	60088261	60098467
MSI1	ENSG00000135097	-2.99098	2.62858	21.7451	3.11e-06	1.73e-05	120341330	120369164
MSLN	ENSG00000102854	-3.58337	4.65823	15.2782	9.28e-05	0.00035377	760734	768865
MSRB3	ENSG00000174099	3.03049	5.22028	137.82	7.98e-32	7.45e-30	65278643	65491430
MT1A	ENSG00000205362	2.42462	0.907581	24.494	7.45e-07	4.74e-06	56638666	56640087
MT1H	ENSG00000205358	-4.29462	0.919088	20.3152	6.57e-06	3.38e-05	56669814	56671129
MTBP	ENSG00000172167	-2.00926	3.72294	78.0491	1.01e-18	3.31e-17	120445400	120542133
MTFR2	ENSG00000146410	-2.3172	2.97726	68.7174	1.14e-16	3.02e-15	136231024	136250335
MTNR1B	ENSG00000134640	-5.30174	-1.61779	14.3305	0.000153364	0.000547647	92969651	92985066
MTTP	ENSG00000138823	2.65838	-0.993971	54.7501	1.37e-13	2.53e-12	99563761	99623999
MUC16	ENSG00000181143	-5.91202	5.04799	23.0196	1.6e-06	9.47e-06	8848844	8981342
MUC21	ENSG00000204544	5.71145	3.26834	94.6033	2.33e-22	1.06e-20	30983718	30989903
MUC22	ENSG00000261272	4.91543	-0.458837	51.022	9.13e-13	1.53e-11	31010474	31035402
MUC3A	ENSG00000169894	-3.05177	3.56824	15.5443	8.06e-05	0.000313008	100949534	100968347
MUC6	ENSG00000184956	-3.1103	1.44247	9.25598	0.00234728	0.00591964	1012823	1036718
MUCL1	ENSG00000172551	-3.82172	1.97613	10.9105	0.000956188	0.00270686	54830518	54896008
MXRA7	ENSG00000182534	2.14147	6.02898	136.426	1.61e-31	1.44e-29	76672551	76711016
MYADM	ENSG00000179820	2.34064	6.59905	89.5257	3.03e-21	1.28e-19	53864763	53876435
MYB	ENSG00000118513	-2.25448	3.17861	24.6009	7.05e-07	4.5e-06	135181308	135219173
MYBL2	ENSG00000101057	-2.57213	6.52657	48.3577	3.55e-12	5.47e-11	43667019	43716495
MYBPH	ENSG00000133055	-6.80743	0.988648	12.6004	0.000385665	0.0012202	203167811	203175826
MYCN	ENSG00000134323	-2.36742	3.12221	11.5221	0.000687751	0.00202824	15940550	15947007
MYEOV	ENSG00000172927	-2.43956	4.73808	11.5399	0.000681174	0.00201054	69294151	69367726
MYH11	ENSG00000133392	3.56201	9.68389	85.0973	2.84e-20	1.09e-18	15703135	15857028
MYH2	ENSG00000125414	5.00618	-1.83758	80.3832	3.08e-19	1.08e-17	10521148	10549700
MYH3	ENSG00000109063	2.76481	2.93768	94.6663	2.25e-22	1.03e-20	10628526	10657309
MYH7B	ENSG00000078814	-2.31324	3.11949	11.883	0.000566484	0.00170682	34955810	35002437
MYL9	ENSG00000101335	3.10707	8.50894	130.122	3.85e-30	3.04e-28	36541497	36551447
MYLK	ENSG00000065534	3.14914	7.35484	130.692	2.89e-30	2.31e-28	123610049	123884332
MYLK2	ENSG00000101306	-2.52192	-0.786701	43.4076	4.44e-11	5.91e-10	31819308	31834689
MYLK4	ENSG00000145949	-2.23094	2.95825	13.4958	0.000239097	0.000807965	2663629	2750922
MYLPF	ENSG00000180209	-2.55846	0.200173	18.1827	2.01e-05	9.19e-05	30370934	30377991
MYO15A	ENSG00000091536	-2.07825	1.28722	14.847	0.000116593	0.000431231	18108706	18179802
MYO16-AS1	ENSG00000236242	-5.55195	-1.61444	13.7184	0.000212369	0.000728698	109163902	109201483
MYO18B	ENSG00000133454	2.79117	0.744039	46.8336	7.73e-12	1.14e-10	25742144	26031045
MYO1A	ENSG00000166866	-2.39103	-0.235163	10.2351	0.0013779	0.00372239	57028517	57051198
MYOC	ENSG00000034971	5.5592	0.771753	124.336	7.11e-29	5.13e-27	171635417	171652688
MYOCD	ENSG00000141052	4.407	3.2169	221.303	4.7e-50	1.7e-47	12665890	12768949
MYOM1	ENSG00000101605	4.10381	2.66099	336.125	4.45e-75	1.55e-71	3066807	3219968
MYOM2	ENSG00000036448	2.76735	0.741111	130.609	3.02e-30	2.39e-28	2045046	2165552
MYOM3	ENSG00000142661	-2.58101	0.99183	24.0047	9.61e-07	5.94e-06	24056035	24112135
MYOT	ENSG00000120729	2.40293	-0.55461	75.0037	4.7e-18	1.45e-16	137867858	137887851
MYOZ3	ENSG00000164591	2.07845	-0.802418	42.5054	7.05e-11	9.14e-10	150660882	150679368
MYPN	ENSG00000138347	-3.5782	0.274616	11.2099	0.000813599	0.00235109	68106117	68212017
MYRFL	ENSG00000166268	-4.06005	0.015455	26.5862	2.52e-07	1.76e-06	69825227	69959097
MYRIP	ENSG00000170011	2.33363	0.186797	44.1799	3e-11	4.1e-10	39808914	40260321
MYT1	ENSG00000196132	-3.55096	2.66018	12.4417	0.000419845	0.00131162	64102394	64242253
NAA11	ENSG00000156269	-5.96417	0.630137	13.7322	0.000210814	0.000724507	79225694	79326061
NACC2	ENSG00000148411	2.67544	5.15857	234.199	7.24e-53	3.4e-50	136006537	136095289
NAGS	ENSG00000161653	-2.40123	2.41755	50.0453	1.5e-12	2.43e-11	44004622	44009068
NAT8	ENSG00000144035	-2.59791	-1.58453	12.6398	0.000377623	0.00119926	73640723	73642422
NBEA	ENSG00000172915	2.55119	2.97738	78.5209	7.92e-19	2.65e-17	34942287	35673022
NBPF4	ENSG00000196427	-2.82053	-1.24553	9.38977	0.00218199	0.00555114	108223341	108244081
NBPF6	ENSG00000186086	-4.14279	-1.60371	13.0572	0.000302126	0.000990332	108450282	108471002
NCALD	ENSG00000104490	2.11528	3.61504	90.8914	1.52e-21	6.58e-20	101686542	102124907
NCAM1	ENSG00000149294	3.36426	4.06894	79.1765	5.68e-19	1.93e-17	112961247	113278436
NCAPG	ENSG00000109805	-2.20359	5.32836	57.6263	3.17e-14	6.4e-13	17810979	17844865
NCAPH	ENSG00000121152	-2.33462	4.72097	64.8184	8.21e-16	1.99e-14	96335766	96377091
NCS1	ENSG00000107130	2.13041	5.6452	127.245	1.64e-29	1.24e-27	130172404	130237303
NDC80	ENSG00000080986	-2.06034	4.87962	48.5896	3.16e-12	4.89e-11	2571557	2616635
NDNF	ENSG00000173376	3.10219	1.44033	83.8603	5.31e-20	2.01e-18	121035613	121073021
NDST3	ENSG00000164100	-2.437	-1.18986	8.6035	0.00335517	0.00804353	118033618	118258634
NECAB1	ENSG00000123119	2.77722	2.41088	98.9708	2.56e-23	1.24e-21	90791741	90959393
NEFL	ENSG00000277586	-4.98885	3.52709	10.4246	0.00124349	0.0034048	24950955	24956721
NEGR1	ENSG00000172260	3.65154	3.70528	165.912	5.78e-38	8.17e-36	71395943	72282539
NEIL3	ENSG00000109674	-2.40345	2.1337	37.5865	8.74e-10	9.62e-09	177309874	177362936
NEK2	ENSG00000117650	-2.46051	4.57759	66.46	3.57e-16	9.03e-15	211658657	211675630
NEURL1	ENSG00000107954	2.46784	2.73549	50.0952	1.46e-12	2.37e-11	103493979	103592552
NEURL3	ENSG00000163121	-2.71167	1.26439	15.7179	7.35e-05	0.000288917	96497646	96508109
NEXMIF	ENSG00000050030	2.5237	-0.808599	27.6128	1.48e-07	1.09e-06	74732856	74925472
NEXN	ENSG00000162614	2.73953	4.72534	121.45	3.05e-28	2.13e-26	77888513	77943895
NFASC	ENSG00000163531	2.81226	3.80767	144.77	2.41e-33	2.42e-31	204828651	205022822
NFIX	ENSG00000008441	2.33912	5.78149	130.976	2.51e-30	2.02e-28	12995475	13098796
NGB	ENSG00000165553	-4.93789	-0.0667718	13.4766	0.000241563	0.000815344	77265483	77271312
NHLH1	ENSG00000171786	-3.30651	0.236362	14.4447	0.000144337	0.000519362	160367071	160372846
NHSL2	ENSG00000204131	2.32837	0.213178	57.0227	4.31e-14	8.58e-13	71910818	72161750
NKAIN4	ENSG00000101198	-2.23061	-0.816869	11.6141	0.00065455	0.00193954	63240784	63272694
NKAPL	ENSG00000189134	3.14906	-1.84976	133.34	7.62e-31	6.43e-29	28259297	28260958
NKX2-1	ENSG00000136352	-4.79461	0.610487	8.55392	0.0034478	0.00823716	36516392	36521149
NKX2-2	ENSG00000125820	-6.75553	-1.5932	10.7298	0.00105425	0.0029456	21511017	21514064
NKX2-5	ENSG00000183072	-7.73558	-0.229135	16.5434	4.75e-05	0.000195968	173232109	173235311
NKX2-8	ENSG00000136327	-3.09354	0.19987	12.2847	0.000456679	0.00141197	36580004	36582614
NKX3-2	ENSG00000109705	-2.865	-0.66206	22.5097	2.09e-06	1.2e-05	13540830	13544508
NKX6-1	ENSG00000163623	-3.15929	-0.174578	8.61508	0.00333391	0.00800138	84491987	84498450
NLGN1	ENSG00000169760	2.71947	1.22491	58.1588	2.42e-14	4.94e-13	173396284	174286644
NLRP7	ENSG00000167634	-7.1949	4.42076	27.9853	1.22e-07	9.17e-07	54923509	54966312
NMUR1	ENSG00000171596	2.02746	-1.04102	34.2058	4.96e-09	4.81e-08	231523187	231530445
NOTUM	ENSG00000185269	-3.54069	5.37583	10.8268	0.00100041	0.0028128	81952507	81961840
NOVA1	ENSG00000139910	2.452	1.75096	54.8288	1.32e-13	2.44e-12	26443090	26598033
NPIPB15	ENSG00000196436	-2.55286	2.74674	15.0104	0.00010692	0.000401262	74377878	74392080
NPR1	ENSG00000169418	2.04466	3.02546	64.3702	1.03e-15	2.47e-14	153678688	153693992
NPSR1-AS1	ENSG00000197085	-4.17158	-1.33684	13.0528	0.000302832	0.000992457	34346512	34871582
NPW	ENSG00000183971	-3.14179	-0.653138	21.931	2.83e-06	1.58e-05	2009926	2020755
NPY6R	ENSG00000226306	4.90223	-0.197931	151.534	8.01e-35	9.16e-33	137801193	137810751
NR2E1	ENSG00000112333	-2.72711	-0.716562	10.7614	0.00103641	0.00290317	108166022	108188805
NR3C2	ENSG00000151623	3.0077	2.58788	123.927	8.74e-29	6.27e-27	148078762	148444698
NR4A1	ENSG00000123358	3.63131	6.90173	212.996	3.05e-48	9.46e-46	52022832	52059507
NR4A2	ENSG00000153234	2.77237	4.65287	149.252	2.53e-34	2.76e-32	156324437	156342348
NR4A3	ENSG00000119508	3.62263	4.28329	173.95	1.01e-39	1.68e-37	99821855	99866891
NR5A1	ENSG00000136931	-4.97397	-0.198501	12.8246	0.000342093	0.00110323	124481236	124507420
NRCAM	ENSG00000091129	-3.25839	3.66015	24.0581	9.35e-07	5.8e-06	108147623	108456717
NRXN1	ENSG00000179915	3.37024	0.74517	39.8063	2.8e-10	3.29e-09	49918503	51225575
NRXN2	ENSG00000110076	2.27902	1.54267	57.843	2.84e-14	5.76e-13	64606174	64723197
NT5DC3	ENSG00000111696	2.4749	3.98375	197.498	7.34e-45	1.8e-42	103770453	103841234
NT5DC4	ENSG00000144130	-3.22231	-1.06043	47.1981	6.42e-12	9.62e-11	112721486	112742879
NTF3	ENSG00000185652	2.33884	0.182704	44.7551	2.23e-11	3.1e-10	5432108	5521536
NTNG1	ENSG00000162631	2.41984	1.21942	26.817	2.24e-07	1.58e-06	107140007	107483458
NTRK3	ENSG00000140538	4.08035	0.711272	182.41	1.44e-41	2.58e-39	87859751	88256768
NTS	ENSG00000133636	-3.10072	3.7583	9.27339	0.00232507	0.0058679	85874295	85882992
NUF2	ENSG00000143228	-2.6861	5.2962	64.2654	1.09e-15	2.6e-14	163266576	163355764
NUSAP1	ENSG00000137804	-2.00764	5.87551	55.0326	1.19e-13	2.21e-12	41320794	41381050
NXPH3	ENSG00000182575	2.94924	2.19818	119.976	6.4e-28	4.29e-26	49575871	49583827
NXPH4	ENSG00000182379	-3.91397	3.56408	35.1646	3.03e-09	3.05e-08	57216794	57226449
ODAPH	ENSG00000174792	-6.56972	0.928734	31.4212	2.08e-08	1.81e-07	75556048	75565871
ODF3L1	ENSG00000182950	2.94159	-0.855707	99.1348	2.36e-23	1.14e-21	75724041	75727688
OGN	ENSG00000106809	4.16406	3.4505	105.264	1.07e-24	5.7e-23	92383268	92404696
OIP5	ENSG00000104147	-2.32225	2.27189	60.2192	8.49e-15	1.81e-13	41309273	41332591
OIT3	ENSG00000138315	-2.05071	-1.78909	14.7775	0.000120967	0.000444946	72893584	72933036
OLFM1	ENSG00000130558	2.38972	2.3831	55.7537	8.21e-14	1.56e-12	135075422	135121180
OLFML1	ENSG00000183801	2.21416	2.65785	96.0945	1.1e-22	5.05e-21	7485388	7511377
OLR1	ENSG00000173391	-2.99399	5.45648	20.63	5.57e-06	2.92e-05	10158301	10172138
OMD	ENSG00000127083	2.74716	1.38627	36.5206	1.51e-09	1.6e-08	92414245	92424461
ONECUT2	ENSG00000119547	-2.93157	3.3436	15.5832	7.9e-05	0.000307385	57435374	57491298
OR2B6	ENSG00000124657	-4.90892	-0.743063	43.5254	4.18e-11	5.58e-10	27957241	27958182
ORC1	ENSG00000085840	-2.39984	3.59353	67.4716	2.14e-16	5.49e-15	52372829	52404423
ORC6	ENSG00000091651	-2.27436	4.15428	65.5773	5.59e-16	1.38e-14	46689643	46698394
OSTN	ENSG00000188729	4.65366	-1.06075	49.9321	1.59e-12	2.57e-11	191199241	191265615
OTOF	ENSG00000115155	-3.5576	1.87121	27.8256	1.33e-07	9.86e-07	26457203	26558756
OTOP3	ENSG00000182938	3.16777	-0.531446	8.52587	0.00350133	0.0083467	74935898	74949992
OTX1	ENSG00000115507	-2.7375	2.21882	49.2715	2.23e-12	3.53e-11	63050057	63057836
OXER1	ENSG00000162881	2.03679	1.29841	73.2647	1.13e-17	3.37e-16	42762481	42764261
OXTR	ENSG00000180914	-2.2926	2.04841	16.8131	4.12e-05	0.000173145	8750408	8769628
P2RX1	ENSG00000108405	4.46515	3.35349	190.473	2.51e-43	5.25e-41	3896592	3916476
P2RY14	ENSG00000174944	2.83861	1.46891	155.288	1.21e-35	1.47e-33	151212117	151278542
PABPC1L	ENSG00000101104	-2.50318	5.73197	46.319	1e-11	1.47e-10	44910060	44959035
PABPC5	ENSG00000174740	2.10003	-0.829563	45.6516	1.41e-11	2.03e-10	91434595	91438584
PAEP	ENSG00000122133	-7.78144	0.173005	21.5379	3.47e-06	1.91e-05	135561756	135566955
PAGE2B	ENSG00000238269	-5.89012	0.26857	9.58721	0.00195938	0.00505585	55075030	55078909
PAGE5	ENSG00000158639	-4.77472	0.296623	13.1856	0.000282107	0.000933692	55220346	55224108
PALLD	ENSG00000129116	2.27854	7.54488	99.5291	1.93e-23	9.41e-22	168497052	168928457
PALM3	ENSG00000187867	-2.17829	4.6445	12.5512	0.000395962	0.00124732	14053363	14062076
PAMR1	ENSG00000149090	2.76711	3.64914	170.992	4.49e-39	7.16e-37	35431823	35530300
PAQR4	ENSG00000162073	-2.1259	4.32475	48.3462	3.57e-12	5.5e-11	2969270	2973484
PARD3B	ENSG00000116117	2.21746	3.20785	113.001	2.16e-26	1.3e-24	204545475	205620162
PART1	ENSG00000152931	2.41776	1.97319	45.4079	1.6e-11	2.27e-10	60487713	60548813
PCAT6	ENSG00000228288	-2.02261	2.70898	39.9999	2.54e-10	3.01e-09	202810954	202812156
PCDHA7	ENSG00000204963	-2.19756	-1.28778	9.83563	0.00171163	0.00449025	140834248	141012347
PCLAF	ENSG00000166803	-2.0377	5.13177	53.9104	2.1e-13	3.78e-12	64364304	64387687
PCOLCE2	ENSG00000163710	3.55626	2.94129	118.652	1.25e-27	8.25e-26	142815922	142889206
PCP2	ENSG00000174788	-2.45548	0.773269	25.7653	3.86e-07	2.6e-06	7631611	7633719
PCP4	ENSG00000183036	3.8178	4.38157	58.5246	2.01e-14	4.14e-13	39867438	39929397
PCSK1N	ENSG00000102109	-3.63113	2.11213	22.5941	2e-06	1.16e-05	48831096	48835610
PCSK2	ENSG00000125851	2.76283	0.318498	16.5693	4.69e-05	0.000193546	17226107	17484578
PCSK9	ENSG00000169174	-2.39194	2.89184	9.90217	0.00165084	0.00435016	55039447	55064852
PDE1A	ENSG00000115252	2.55452	2.69685	108.725	1.86e-25	1.05e-23	182140036	182523192
PDE1C	ENSG00000154678	3.51863	1.82935	188.975	5.32e-43	1.08e-40	31751179	32428131
PDE2A	ENSG00000186642	2.73221	3.30543	159.347	1.57e-36	2.05e-34	72576141	72674591
PDE5A	ENSG00000138735	2.21613	4.34549	100.66	1.09e-23	5.38e-22	119494397	119628804
PDIA2	ENSG00000185615	-3.29186	0.262916	22.6168	1.98e-06	1.14e-05	283164	287215
PDK4	ENSG00000004799	3.13495	5.89868	128.445	8.97e-30	6.86e-28	95583499	95596516
PDLIM3	ENSG00000154553	2.62477	5.79989	72.3056	1.84e-17	5.3e-16	185500660	185535507
PDX1	ENSG00000139515	-3.95918	0.0957136	16.6165	4.58e-05	0.00018937	27920000	27926313
PDZD3	ENSG00000172367	-2.55249	1.0548	8.26568	0.00404016	0.00946883	119185457	119190223
PDZD4	ENSG00000067840	3.13369	2.30321	115.685	5.57e-27	3.53e-25	153802166	153830565
PDZD7	ENSG00000186862	-2.03803	0.646549	26.8305	2.22e-07	1.57e-06	101007679	101032295
PDZK1	ENSG00000174827	-3.48989	0.466983	27.2045	1.83e-07	1.33e-06	145670852	145708148
PDZRN3	ENSG00000121440	2.80645	4.02582	106.588	5.48e-25	2.98e-23	73382431	73624941
PDZRN4	ENSG00000165966	4.7703	1.69273	146.023	1.28e-33	1.32e-31	41188320	41574745
PELI2	ENSG00000139946	2.11406	3.2757	78.6648	7.36e-19	2.47e-17	56117814	56301524
PENK	ENSG00000181195	2.42831	-0.850407	13.0017	0.000311207	0.00101703	56436674	56446671
PER1	ENSG00000179094	2.13218	5.65994	110.144	9.11e-26	5.24e-24	8140472	8156506
PER2	ENSG00000132326	2.21894	4.21879	190.741	2.19e-43	4.64e-41	238244044	238290102
PEX5L	ENSG00000114757	-2.59883	-0.0904662	10.8026	0.00101359	0.00284527	179794958	180037053
PFKFB4	ENSG00000114268	-2.53985	4.35215	64.8887	7.93e-16	1.93e-14	48517684	48562015
PGC	ENSG00000096088	-4.63134	0.360867	8.73005	0.00313008	0.00758764	41736711	41754109
PGLYRP2	ENSG00000161031	-2.23045	-0.650644	8.27434	0.00402093	0.00943648	15468645	15498956
PGM5	ENSG00000154330	4.27745	5.34201	174.266	8.66e-40	1.46e-37	68328308	68531061
PGM5-AS1	ENSG00000224958	5.42591	1.45421	91.6583	1.03e-21	4.53e-20	68353614	68357893
PGR	ENSG00000082175	3.27935	0.768076	156.762	5.77e-36	7.16e-34	101029624	101129813
PHACTR3	ENSG00000087495	-2.01376	1.29659	10.6134	0.00112272	0.00311634	59577509	59847711
PHGR1	ENSG00000233041	-4.39786	1.98436	8.16726	0.00426533	0.00993756	40351033	40356434
PHYHIP	ENSG00000168490	2.86935	2.23173	81.6532	1.62e-19	5.86e-18	22219703	22232101
PI16	ENSG00000164530	5.64405	3.87191	185.025	3.88e-42	7.24e-40	36948263	36964837
PI4KAP1	ENSG00000274602	-2.33513	3.49036	23.9524	9.87e-07	6.09e-06	18533646	18577968
PI4KAP2	ENSG00000183506	-2.0185	3.42718	25.0038	5.72e-07	3.72e-06	21473000	21517533
PICSAR	ENSG00000275874	-4.21241	1.40499	13.1356	0.000289736	0.000956332	44999208	45004727
PID1	ENSG00000153823	2.83364	2.91789	122.967	1.42e-28	1e-26	228850526	229271287
PIF1	ENSG00000140451	-2.13033	3.40235	61	5.71e-15	1.24e-13	64815632	64825668
PIMREG	ENSG00000129195	-2.21613	3.68632	40.137	2.37e-10	2.82e-09	6444441	6451469
PIP	ENSG00000159763	-5.80047	0.471101	11.2858	0.000781027	0.00226828	143132077	143139739
PIWIL1	ENSG00000125207	-3.51508	-1.07735	8.7466	0.0031018	0.00752748	130337887	130372637
PIWIL3	ENSG00000184571	-6.93814	-0.628007	12.4991	0.000407151	0.00127655	24719034	24774720
PKD1L1	ENSG00000158683	-2.19958	2.39467	15.7739	7.14e-05	0.000281372	47740202	47948466
PKDCC	ENSG00000162878	2.91224	3.94117	67.7644	1.84e-16	4.78e-15	42048021	42058517
PKHD1L1	ENSG00000205038	2.02031	-1.1511	23.1876	1.47e-06	8.76e-06	109362461	109537207
PKIB	ENSG00000135549	-2.03213	3.14748	19.5641	9.73e-06	4.8e-05	122471917	122726373
PKIG	ENSG00000168734	2.09267	5.42524	123.515	1.08e-28	7.66e-27	44531785	44624247
PKMYT1	ENSG00000127564	-2.03991	4.86848	46.2759	1.03e-11	1.5e-10	2968024	2980479
PLA2G2F	ENSG00000158786	-2.48617	6.53024	11.0163	0.000903124	0.00257637	20139323	20150381
PLA2G5	ENSG00000127472	3.37045	1.33831	129.695	4.78e-30	3.74e-28	20028179	20091911
PLAC9	ENSG00000189129	3.15359	2.18091	195.587	1.92e-44	4.57e-42	80131682	80145359
PLAU	ENSG00000122861	-2.06065	7.61011	24.1681	8.83e-07	5.51e-06	73909177	73917496
PLCB4	ENSG00000101333	2.80373	3.06025	102.124	5.21e-24	2.61e-22	9068763	9481242
PLCD4	ENSG00000115556	2.81842	2.1783	341.977	2.37e-76	1.03e-72	218607855	218637184
PLCL1	ENSG00000115896	2.23121	1.59614	116.051	4.63e-27	2.95e-25	197804593	198572581
PLEKHG4B	ENSG00000153404	-4.35037	3.22681	27.891	1.28e-07	9.56e-07	92151	189972
PLIN4	ENSG00000167676	2.61059	5.07424	75.8233	3.1e-18	9.77e-17	4502180	4518465
PLK1	ENSG00000166851	-2.3051	5.54661	56.2703	6.32e-14	1.23e-12	23677656	23690367
PLK4	ENSG00000142731	-2.03449	4.5688	81.0561	2.19e-19	7.78e-18	127880893	127899224
PLN	ENSG00000198523	3.31228	4.32427	77.956	1.05e-18	3.46e-17	118548296	118561716
PLP1	ENSG00000123560	4.25864	0.786882	139.065	4.26e-32	4.07e-30	103773718	103792619
PLPP3	ENSG00000162407	2.01912	5.97725	143.479	4.62e-33	4.51e-31	56494761	56645301
PLPP4	ENSG00000203805	-4.22971	1.96685	28.9558	7.4e-08	5.83e-07	120457227	120592065
PLPP7	ENSG00000160539	2.35562	1.15556	74.1194	7.35e-18	2.23e-16	131289459	131359022
PLPPR3	ENSG00000129951	-3.35175	-1.22478	12.6068	0.000384356	0.00121672	812488	821955
PLPPR4	ENSG00000117600	3.53219	1.77067	234.352	6.7e-53	3.24e-50	99263953	99309590
PM20D1	ENSG00000162877	-3.64927	6.49248	11.4891	0.000700047	0.00205925	205828025	205850132
PMP2	ENSG00000147588	3.52715	-0.951778	69.6217	7.18e-17	1.93e-15	81440326	81447439
PNLDC1	ENSG00000146453	-3.03231	0.344727	11.6753	0.00063334	0.00188473	159800249	159820704
PNMA5	ENSG00000198883	-6.50814	3.60822	12.54	0.000398323	0.00125317	152988824	152994116
PNMT	ENSG00000141744	-3.66061	3.98459	17.8198	2.43e-05	0.000108337	39667981	39670475
PNPLA1	ENSG00000180316	-2.80625	0.14876	18.7624	1.48e-05	7.01e-05	36243203	36312229
PNPLA3	ENSG00000100344	-3.66907	-0.64949	24.6867	6.74e-07	4.32e-06	43923792	43964488
PODN	ENSG00000174348	2.47425	4.95579	72.3535	1.8e-17	5.19e-16	53062052	53085501
PODXL2	ENSG00000114631	-2.01887	5.9142	24.0698	9.29e-07	5.77e-06	127629185	127672802
POLQ	ENSG00000051341	-2.61526	4.01841	84.4089	4.02e-20	1.53e-18	121431427	121546641
POPDC2	ENSG00000121577	3.45716	3.10712	188.584	6.48e-43	1.29e-40	119636457	119665324
POSTN	ENSG00000133110	-2.09122	8.53423	13.3415	0.000259591	0.000868698	37562583	37598844
POTEF	ENSG00000196604	-2.23715	-1.58271	9.02653	0.0026609	0.00659568	130073535	130129222
POU3F2	ENSG00000184486	-4.50783	0.362157	10.1794	0.00142019	0.00381644	98834574	98839458
POU4F1	ENSG00000152192	-4.21843	0.16717	19.9303	8.03e-06	4.06e-05	78598362	78603552
POU4F3	ENSG00000091010	-4.56473	-0.420601	8.76744	0.00306656	0.00745968	146338839	146341728
POU5F1	ENSG00000204531	-2.34419	3.78631	18.2164	1.97e-05	9.08e-05	31164337	31180731
PPFIA4	ENSG00000143847	-2.72149	1.95268	31.7004	1.8e-08	1.59e-07	203026498	203078740
PPP1R12B	ENSG00000077157	3.22452	6.56675	218.005	2.46e-49	8.08e-47	202348699	202592706
PPP1R14A	ENSG00000167641	3.23166	3.50102	186.212	2.13e-42	4.21e-40	38251237	38256532
PPP1R14D	ENSG00000166143	-5.68722	2.14544	31.1079	2.44e-08	2.09e-07	40815451	40828709
PPP1R1A	ENSG00000135447	3.59886	0.569523	90.2014	2.15e-21	9.18e-20	54575387	54588659
PPP4R4	ENSG00000119698	-3.45532	0.631532	14.5479	0.000136638	0.000495262	94146128	94279734
PPY	ENSG00000108849	-5.80828	-0.976269	8.27187	0.00402641	0.00944477	43940804	43942476
PRAME	ENSG00000185686	-6.42346	4.08921	18.248	1.94e-05	8.95e-05	22547701	22559361
PRAP1	ENSG00000165828	-3.43581	2.77532	14.8849	0.000114275	0.000423649	133347368	133352683
PRDM13	ENSG00000112238	-5.87576	-1.59136	14.7976	0.000119687	0.000441078	99606774	99615578
PRDM6	ENSG00000061455	3.01011	2.74495	127.562	1.4e-29	1.06e-27	123089241	123194266
PRDM8	ENSG00000152784	2.00556	1.97237	53.242	2.95e-13	5.22e-12	80183879	80204329
PRELP	ENSG00000188783	3.64524	5.02806	157.738	3.53e-36	4.48e-34	203475806	203491352
PRICKLE2	ENSG00000163637	2.15521	4.01757	109.091	1.55e-25	8.8e-24	64092236	64445476
PRIMA1	ENSG00000175785	3.28316	1.12643	70.6889	4.18e-17	1.15e-15	93718298	93788485
PRKAA2	ENSG00000162409	2.3173	2.61594	50.6389	1.11e-12	1.83e-11	56645314	56715335
PRKCB	ENSG00000166501	2.12923	3.56569	48.81	2.82e-12	4.4e-11	23835983	24220611
PRKG1	ENSG00000185532	2.59713	3.0378	112.279	3.1e-26	1.85e-24	50990888	52298423
PRKN	ENSG00000185345	2.44894	0.847527	102.529	4.25e-24	2.13e-22	161347417	162727775
PROC	ENSG00000115718	-2.00428	1.53518	18.2609	1.93e-05	8.89e-05	127418427	127429242
PRPH	ENSG00000135406	2.01093	-1.73371	20.8508	4.96e-06	2.65e-05	49293252	49298686
PRR11	ENSG00000068489	-2.13094	4.91423	55.867	7.75e-14	1.49e-12	59155732	59206709
PRR19	ENSG00000188368	-2.16485	1.57313	54.8748	1.28e-13	2.38e-12	42302098	42310821
PRR36	ENSG00000183248	-2.9818	4.03261	24.9491	5.89e-07	3.82e-06	7868719	7874390
PRR9	ENSG00000203783	-5.79675	3.11407	14.0279	0.000180116	0.000630733	153217584	153219310
PRRG3	ENSG00000130032	2.8977	-0.387832	72.7088	1.5e-17	4.38e-16	151694607	151705924
PRSS1	ENSG00000204983	-8.32259	3.67933	15.9698	6.44e-05	0.00025662	142749468	142753076
PRSS2	ENSG00000275896	-7.97444	5.15377	19.3595	1.08e-05	5.29e-05	142760398	142774564
PRSS27	ENSG00000172382	2.04472	3.726	44.8282	2.15e-11	2.99e-10	2712419	2720551
PRSS33	ENSG00000103355	-5.54504	-0.0627219	9.59632	0.00194968	0.00503457	2783953	2787948
PRSS56	ENSG00000237412	-12.9881	4.4461	10.2779	0.0013463	0.00364837	232520388	232525716
PRSS8	ENSG00000052344	-2.09927	6.41489	22.3123	2.32e-06	1.32e-05	31131433	31135727
PRUNE2	ENSG00000106772	3.84346	4.59475	133.373	7.49e-31	6.35e-29	76611376	76906114
PSD	ENSG00000059915	4.03335	4.3493	269.013	1.86e-60	1.8e-57	102402617	102421539
PSD2	ENSG00000146005	-2.01059	0.313689	9.00377	0.00269424	0.00666786	139795808	139844466
PSG4	ENSG00000243137	-5.76896	1.86142	16.4073	5.11e-05	0.000208774	43192702	43207299
PSG5	ENSG00000204941	-9.90271	1.3814	26.9914	2.04e-07	1.46e-06	43166256	43186536
PSORS1C2	ENSG00000204538	-5.24616	4.35402	25.8247	3.74e-07	2.52e-06	31137534	31139066
PSORS1C3	ENSG00000204528	-2.28309	1.16545	10.1568	0.00143769	0.003858	31173735	31177899
PTGDS	ENSG00000107317	2.30317	5.62816	42.8954	5.77e-11	7.54e-10	136975092	136981742
PTGES2-AS1	ENSG00000232850	-2.02615	-1.36813	18.0527	2.15e-05	9.74e-05	128128529	128130628
PTGES3L	ENSG00000267060	2.53362	0.0934843	146.873	8.37e-34	8.76e-32	42968088	42980433
PTGFR	ENSG00000122420	3.21459	2.27243	98.2238	3.74e-23	1.76e-21	78303884	78540701
PTGIS	ENSG00000124212	3.09212	5.6099	72.9204	1.35e-17	3.96e-16	49503874	49568137
PTGS1	ENSG00000095303	3.84508	6.03562	174.09	9.46e-40	1.58e-37	122370530	122395703
PTH1R	ENSG00000160801	2.83175	0.668601	147.337	6.62e-34	7.02e-32	46877721	46903799
PTH2R	ENSG00000144407	-2.8677	2.08231	10.2301	0.00138168	0.00372911	208359714	208854503
PTPRN	ENSG00000054356	-3.38952	0.968644	18.2269	1.96e-05	9.03e-05	219289623	219309648
PTPRR	ENSG00000153233	-2.72385	4.44777	14.8525	0.000116257	0.00043017	70638073	70920738
PTX3	ENSG00000163661	2.11509	2.91233	22.8637	1.74e-06	1.02e-05	157436850	157443633
PYCR1	ENSG00000183010	-2.51651	6.04383	43.8368	3.57e-11	4.81e-10	81932384	81942412
PYGM	ENSG00000068976	4.89397	1.99346	429.737	1.85e-95	1.61e-91	64746389	64759974
RAB23	ENSG00000112210	2.53384	3.8787	152.468	5.01e-35	5.88e-33	57186992	57222307
RAB9B	ENSG00000123570	3.34261	1.67303	223.979	1.23e-50	4.95e-48	103822327	103832257
RAC3	ENSG00000169750	-2.88414	4.08425	63.312	1.76e-15	4.09e-14	82031678	82034204
RAD51	ENSG00000051180	-2.01628	4.03197	66.4448	3.6e-16	9.09e-15	40694774	40732340
RAD51AP1	ENSG00000111247	-2.08332	4.45939	54.6476	1.44e-13	2.66e-12	4538798	4560047
RAD54L	ENSG00000085999	-2.51715	3.67831	73.9718	7.92e-18	2.39e-16	46246461	46278480
RAET1K	ENSG00000218358	-4.41081	-1.28102	63.3135	1.76e-15	4.09e-14	149998019	150005157
RAI2	ENSG00000131831	2.94414	2.68468	185.743	2.7e-42	5.22e-40	17800049	17861337
RAMP1	ENSG00000132329	2.6273	4.35685	67.5154	2.09e-16	5.38e-15	237858893	237912106
RANBP3L	ENSG00000164188	4.29455	1.12427	185.915	2.48e-42	4.84e-40	36246913	36302114
RAPSN	ENSG00000165917	-3.09154	0.0442022	23.8717	1.03e-06	6.33e-06	47437764	47449143
RARRES1	ENSG00000118849	-2.46136	7.87295	12.9139	0.000326159	0.00105872	158696892	158732489
RASD1	ENSG00000108551	2.03458	3.7711	35.3637	2.74e-09	2.78e-08	17494437	17496395
RASGRF1	ENSG00000058335	-2.13267	1.79528	16.524	4.8e-05	0.000197752	78959906	79090780
RASGRP2	ENSG00000068831	2.46653	2.66272	90.5722	1.78e-21	7.69e-20	64726911	64745456
RASL10A	ENSG00000100276	-2.23207	1.13362	22.3673	2.25e-06	1.29e-05	29312933	29319679
RASL11A	ENSG00000122035	2.27343	2.92694	81.0445	2.21e-19	7.81e-18	27270830	27275192
RASL12	ENSG00000103710	3.13859	3.56573	184.992	3.94e-42	7.28e-40	65053337	65076690
RBFOX3	ENSG00000167281	5.3538	2.25409	208.958	2.32e-47	6.95e-45	79089345	79516148
RBM24	ENSG00000112183	2.90133	1.1345	64.0777	1.2e-15	2.84e-14	17281361	17293871
RBP3	ENSG00000265203	-3.71086	-1.31081	17.1166	3.52e-05	0.000149893	47348363	47357881
RBPMS2	ENSG00000166831	3.88889	3.9086	237.469	1.4e-53	7.61e-51	64739891	64775589
RCAN1	ENSG00000159200	2.05065	5.9555	92.3732	7.18e-22	3.17e-20	34513142	34615113
RCAN2	ENSG00000172348	3.1816	4.05958	221.211	4.92e-50	1.71e-47	46220736	46491972
RDH12	ENSG00000139988	2.35946	1.3286	38.3784	5.83e-10	6.57e-09	67701886	67734451
RDH16	ENSG00000139547	-2.43078	1.75934	23.8496	1.04e-06	6.4e-06	56951431	56959374
RDM1	ENSG00000278023	-3.52502	1.52975	67.1126	2.56e-16	6.56e-15	35918066	35930773
RECQL4	ENSG00000160957	-2.23558	5.77496	76.7633	1.93e-18	6.18e-17	144511288	144517845
REEP1	ENSG00000068615	3.95725	2.50024	160.918	7.13e-37	9.83e-35	86213993	86338083
REEP2	ENSG00000132563	2.23298	2.48153	60.555	7.15e-15	1.54e-13	138439057	138446969
REG1A	ENSG00000115386	-7.44279	-0.977141	11.413	0.000729324	0.00213454	79120362	79123409
REG4	ENSG00000134193	-2.88606	1.5508	10.3128	0.0013211	0.00358692	119794017	119811580
REN	ENSG00000143839	-2.67447	2.70923	10.4711	0.00121254	0.00333054	204154819	204190324
RERG	ENSG00000134533	2.29879	3.1324	82.0962	1.3e-19	4.71e-18	15107783	15348675
RERGL	ENSG00000111404	3.37896	-0.11837	82.1989	1.23e-19	4.48e-18	18080869	18320107
RGN	ENSG00000130988	2.5997	0.673205	73.3415	1.09e-17	3.25e-16	47078355	47093314
RGS2	ENSG00000116741	2.34927	5.9995	78.4969	8.01e-19	2.68e-17	192809039	192812275
RGS20	ENSG00000147509	-3.40531	1.93563	31.2763	2.24e-08	1.94e-07	53851795	53959303
RGS22	ENSG00000132554	2.98189	-0.880473	97.4383	5.56e-23	2.61e-21	99960936	100131268
RHBG	ENSG00000132677	-3.3623	3.56882	21.4882	3.56e-06	1.96e-05	156369211	156385219
RHCG	ENSG00000140519	3.00687	6.20289	41.9966	9.14e-11	1.17e-09	89471398	89496589
RHEBL1	ENSG00000167550	-2.2204	1.21092	51.1899	8.38e-13	1.41e-11	49064676	49070025
RHPN1	ENSG00000158106	-2.10217	5.45815	32.7312	1.06e-08	9.72e-08	143368876	143384221
RHPN1-AS1	ENSG00000254389	-2.12785	0.56356	38.8846	4.5e-10	5.16e-09	143366631	143368548
RIBC2	ENSG00000128408	-2.2662	1.91347	45.1402	1.83e-11	2.58e-10	45413693	45432509
RIPPLY3	ENSG00000183145	-2.55786	2.80641	27.0452	1.99e-07	1.43e-06	37006150	37019662
RLBP1	ENSG00000140522	-3.88275	-1.66575	11.6742	0.00063374	0.00188559	89209869	89221614
RLN1	ENSG00000107018	-2.87075	-1.31497	18.7245	1.51e-05	7.14e-05	5334930	5339876
RLN2	ENSG00000107014	-2.96219	-0.444898	24.5761	7.14e-07	4.55e-06	5299864	5304716
RN7SL2	ENSG00000274012	-2.74909	7.62445	12.6796	0.000369668	0.00117773	49862550	49862849
RNASE7	ENSG00000165799	-3.31688	2.30911	19.1042	1.24e-05	5.96e-05	21042316	21044234
RND1	ENSG00000172602	2.08984	2.32122	68.3491	1.37e-16	3.61e-15	48857145	48865870
RNF112	ENSG00000128482	2.54059	0.230441	122.07	2.23e-28	1.56e-26	19411125	19417276
RNF122	ENSG00000133874	2.1097	3.33688	167.739	2.31e-38	3.4e-36	33547754	33567128
RNF144A-AS1	ENSG00000228203	-2.76338	0.81217	33.2802	7.98e-09	7.48e-08	6911754	6918734
RNF150	ENSG00000170153	3.08039	3.5758	144.159	3.28e-33	3.26e-31	140859807	141212877
RNF180	ENSG00000164197	2.28579	1.91113	106.177	6.74e-25	3.64e-23	64165843	64372869
RNF182	ENSG00000180537	-3.28658	1.4441	19.7828	8.68e-06	4.34e-05	13924446	13980310
RNF183	ENSG00000165188	-2.34957	0.80144	10.1618	0.00143383	0.00384895	113297093	113303376
RNF186	ENSG00000178828	-4.59521	0.294155	12.1376	0.000494152	0.00151036	19814029	19815283
RNF222	ENSG00000189051	2.60928	-0.20274	41.6506	1.09e-10	1.37e-09	8390704	8397826
RNFT2	ENSG00000135119	-2.54753	2.59367	50.3881	1.26e-12	2.06e-11	116738178	116853631
RNU4-1	ENSG00000200795	-6.51664	2.44659	11.3942	0.000736744	0.00215335	120293097	120293237
RNU4-2	ENSG00000202538	-5.90964	3.8728	15.4371	8.53e-05	0.000329433	120291763	120291903
ROR1	ENSG00000185483	2.46292	1.85398	72.5977	1.59e-17	4.63e-16	63774017	64181498
RORB	ENSG00000198963	2.23639	0.295133	31.3755	2.13e-08	1.85e-07	74497335	74693177
ROS1	ENSG00000047936	-7.22167	1.64849	20.2802	6.69e-06	3.44e-05	117287353	117425942
RPLP0P2	ENSG00000243742	-3.67424	2.00191	49.1478	2.37e-12	3.74e-11	61615036	61639449
RPSAP52	ENSG00000241749	-4.72367	-0.323245	20.8529	4.96e-06	2.65e-05	65758020	65826997
RS1	ENSG00000102104	-2.63025	-1.58661	12.7469	0.000356607	0.00114283	18639688	18672108
RSAD2	ENSG00000134321	-2.37454	5.01458	21.9821	2.75e-06	1.54e-05	6865806	6898239
RSPO1	ENSG00000169218	2.58427	-1.52088	44.069	3.17e-11	4.32e-10	37611350	37634892
RSPO2	ENSG00000147655	2.77926	0.0669653	33.5082	7.1e-09	6.69e-08	107899316	108083642
RSPO3	ENSG00000146374	2.15791	1.88546	27.5476	1.53e-07	1.13e-06	127118671	127199481
RSPO4	ENSG00000101282	-2.83689	1.85284	12.3949	0.000430497	0.0013408	958452	1002311
RTBDN	ENSG00000132026	-2.04572	-0.82069	8.65281	0.00326557	0.00785691	12825478	12835428
RTL5	ENSG00000242732	2.26391	2.36977	72.1097	2.04e-17	5.82e-16	72127110	72131901
RTL9	ENSG00000243978	-3.90243	1.20014	9.12903	0.00251585	0.00628909	110358816	110456334
RTN4R	ENSG00000040608	-2.40352	3.02337	41.9491	9.37e-11	1.19e-09	20241415	20283246
RUNDC3A	ENSG00000108309	-2.146	1.51456	18.1729	2.02e-05	9.23e-05	44308413	44318670
RUNX1T1	ENSG00000079102	2.39563	1.76619	75.9084	2.97e-18	9.37e-17	91954967	92103286
RXFP1	ENSG00000171509	-2.41799	0.587527	14.0889	0.000174366	0.000613564	158315311	158653372
RXRG	ENSG00000143171	3.47902	-1.65233	72.0271	2.12e-17	6.06e-16	165400922	165445355
RYR2	ENSG00000198626	3.1512	1.99441	115.623	5.75e-27	3.63e-25	237042184	237833988
RYR3	ENSG00000198838	2.883	1.1181	238.688	7.6e-54	4.55e-51	33310962	33866121
S100A3	ENSG00000188015	-2.43748	4.10251	10.9536	0.00093423	0.00265291	153547329	153549258
S1PR5	ENSG00000180739	-2.32221	3.94757	26.6969	2.38e-07	1.67e-06	10512742	10517931
SAA2	ENSG00000134339	-3.1203	3.08104	12.4979	0.000407407	0.00127713	18239223	18248668
SALL4	ENSG00000101115	-3.67687	2.50123	54.22	1.79e-13	3.27e-12	51782331	51802521
SAMD4A	ENSG00000020577	2.06553	4.23562	88.661	4.69e-21	1.94e-19	54566117	54793315
SAPCD1	ENSG00000228727	-2.54006	-0.290289	41.6435	1.1e-10	1.38e-09	31762996	31764851
SAPCD2	ENSG00000186193	-2.50729	5.16796	53.7979	2.22e-13	3.99e-12	137062127	137070557
SATB2-AS1	ENSG00000225953	-2.63031	-1.81737	18.1508	2.04e-05	9.31e-05	199457700	199476935
SBK1	ENSG00000188322	-2.71401	4.83583	22.0235	2.69e-06	1.51e-05	28259246	28323849
SBSPON	ENSG00000164764	2.84659	3.82866	93.3493	4.38e-22	1.95e-20	73064543	73124088
SCARA5	ENSG00000168079	5.13016	3.25108	246.715	1.35e-55	9.78e-53	27869883	27992673
SCARNA10	ENSG00000239002	-6.35926	1.20119	14.2685	0.000158493	0.000563532	6510222	6510551
SCARNA12	ENSG00000238795	-3.27555	-0.574872	19.31	1.11e-05	5.42e-05	6967337	6967606
SCARNA13	ENSG00000252481	-3.98235	1.30983	26.2655	2.98e-07	2.04e-06	95533355	95533629
SCARNA21	ENSG00000252835	-4.0382	0.828925	15.2719	9.31e-05	0.00035469	7906122	7906260
SCARNA6	ENSG00000251791	-3.62274	-0.692553	10.8411	0.000992714	0.00279342	233288676	233288940
SCARNA7	ENSG00000238741	-3.09016	0.624571	11.8327	0.000581991	0.00174899	160514907	160515236
SCD	ENSG00000099194	-2.09296	9.08007	26.8531	2.2e-07	1.56e-06	100347233	100364826
SCG2	ENSG00000171951	-2.47446	2.46007	15.1379	9.99e-05	0.000378329	223596940	223602361
SCGB3A2	ENSG00000164265	-4.5523	-1.54174	12.5601	0.000394069	0.00124299	147870682	147882191
SCN11A	ENSG00000168356	4.33128	1.7684	121.288	3.3e-28	2.29e-26	38845764	39052157
SCN2B	ENSG00000149575	3.02878	-1.29871	56.4659	5.72e-14	1.12e-12	118162806	118176639
SCN4B	ENSG00000177098	2.33288	1.93449	91.4049	1.17e-21	5.12e-20	118133377	118152888
SCN7A	ENSG00000136546	3.44912	1.50068	62.6788	2.43e-15	5.54e-14	166403573	166611482
SCN8A	ENSG00000196876	-2.24284	1.88005	18.6173	1.6e-05	7.5e-05	51590266	51812864
SCRG1	ENSG00000164106	2.31396	1.90562	20.404	6.27e-06	3.24e-05	173384701	173406380
SCTR	ENSG00000080293	-3.15684	-0.998187	8.56188	0.00343274	0.00820571	119439843	119525301
SCUBE1	ENSG00000159307	2.67014	1.01902	84.5979	3.66e-20	1.4e-18	43197280	43343372
SEC14L4	ENSG00000133488	-3.07238	0.465132	13.7065	0.000213711	0.000732723	30488902	30505711
SELE	ENSG00000007908	2.2431	4.63355	32.1863	1.4e-08	1.26e-07	169722640	169764705
SEMA3E	ENSG00000170381	2.19385	2.69372	38.8058	4.68e-10	5.34e-09	83363238	83649139
SEMA3G	ENSG00000010319	2.02766	3.35383	93.719	3.64e-22	1.63e-20	52433035	52445103
SEPT4-AS1	ENSG00000264672	-2.32672	-1.41434	38.8494	4.58e-10	5.24e-09	58519837	58557799
SERPINA1	ENSG00000197249	-2.75989	6.33985	19.8885	8.21e-06	4.14e-05	94376747	94390693
SERPINA10	ENSG00000140093	-4.57731	-1.63582	12.5228	0.000402007	0.00126339	94280460	94293268
SERPINA4	ENSG00000100665	-6.53698	-0.999275	10.7256	0.00105663	0.00295131	94561442	94569913
SERPINA6	ENSG00000170099	-6.4782	-0.351751	11.2611	0.00079149	0.00229522	94304248	94323389
SERPINB11	ENSG00000206072	2.32883	0.851697	8.68964	0.00320024	0.00772333	63647579	63726432
SERPINB12	ENSG00000166634	3.94178	-0.990059	18.6916	1.54e-05	7.25e-05	63556160	63567011
SERPINB7	ENSG00000166396	-3.24695	2.66641	8.26442	0.00404295	0.00947409	63752935	63805376
SERPINC1	ENSG00000117601	-2.92308	-0.832886	15.2171	9.58e-05	0.000363979	173903809	173917378
SFRP1	ENSG00000104332	2.84916	4.36361	52.2974	4.77e-13	8.27e-12	41261962	41309473
SFRP5	ENSG00000120057	3.5718	-0.987572	41.8506	9.85e-11	1.25e-09	97766751	97771999
SGCA	ENSG00000108823	3.84762	2.27399	143.923	3.69e-33	3.65e-31	50164214	50175928
SGCD	ENSG00000170624	2.87868	2.9606	80.9613	2.3e-19	8.11e-18	155870344	156767788
SGCG	ENSG00000102683	3.79378	-1.17065	69.8476	6.41e-17	1.73e-15	23180979	23325162
SGK2	ENSG00000101049	-2.0022	3.57702	9.4557	0.00210494	0.00538356	43558968	43588237
SGO1	ENSG00000129810	-2.59736	4.03194	72.9774	1.31e-17	3.86e-16	20160593	20186206
SH2D5	ENSG00000189410	-2.6501	1.66649	12.917	0.00032561	0.00105734	20719731	20732837
SH3BGR	ENSG00000185437	2.6968	2.36036	230.988	3.63e-52	1.62e-49	39445855	39515506
SHD	ENSG00000105251	-2.84197	-0.220021	11.8164	0.000587127	0.00176321	4279266	4290722
SHH	ENSG00000164690	2.33986	4.98419	17.7105	2.57e-05	0.000113838	155799980	155812463
SHISA2	ENSG00000180730	-3.38047	4.24499	17.4007	3.03e-05	0.000131553	26044597	26052016
SHISA3	ENSG00000178343	2.8524	-0.426914	25.4265	4.6e-07	3.05e-06	42397488	42402487
SHISA6	ENSG00000188803	3.0542	-0.421208	49.8483	1.66e-12	2.67e-11	11241213	11564063
SHISAL1	ENSG00000138944	4.44786	2.62721	259.575	2.12e-58	1.94e-55	44243665	44312951
SHOX2	ENSG00000168779	-2.23981	1.67587	12.8471	0.000338011	0.00109209	158095905	158106420
SIGLEC12	ENSG00000254521	-2.09102	0.658152	10.9087	0.000957117	0.00270861	51491227	51501800
SIGLEC5	ENSG00000105501	-3.85652	2.10694	17.4266	2.99e-05	0.000129978	51611927	51645545
SIM2	ENSG00000159263	-2.23805	3.8506	33.6211	6.7e-09	6.34e-08	36699115	36749917
SIX1	ENSG00000126778	-2.20576	3.41048	31.5226	1.97e-08	1.73e-07	60643421	60658259
SKA1	ENSG00000154839	-2.3504	3.96325	64.0172	1.23e-15	2.93e-14	50375040	50394168
SKA3	ENSG00000165480	-2.33852	4.03891	72.2328	1.91e-17	5.48e-16	21153595	21176552
SLAMF9	ENSG00000162723	-2.62485	-0.551793	11.9837	0.000536675	0.00162631	159951492	159954237
SLC10A1	ENSG00000100652	-4.34598	1.01922	11.6351	0.000647204	0.00192066	69775416	69797241
SLC10A4	ENSG00000145248	-2.60452	0.0653345	13.3286	0.000261389	0.000872435	48483343	48489526
SLC12A3	ENSG00000070915	-3.17303	0.582112	10.2675	0.00135393	0.0036662	56865207	56915850
SLC12A8	ENSG00000221955	-2.19764	4.46205	43.4055	4.45e-11	5.91e-10	125082636	125212864
SLC13A5	ENSG00000141485	-3.28762	0.104089	17.4462	2.96e-05	0.000128805	6684719	6713377
SLC15A1	ENSG00000088386	-2.95492	3.99725	22.9815	1.64e-06	9.64e-06	98683801	98752672
SLC1A6	ENSG00000105143	-6.88002	5.46574	25.9002	3.6e-07	2.44e-06	14950034	15022990
SLC22A1	ENSG00000175003	-2.38837	0.0792929	17.6154	2.7e-05	0.000119186	160121815	160158718
SLC22A11	ENSG00000168065	-5.47153	-0.0555813	11.7152	0.000619928	0.00184862	64555690	64572875
SLC22A31	ENSG00000259803	-3.39364	-1.03868	15.0756	0.000103291	0.000389663	89195761	89201651
SLC23A1	ENSG00000170482	-2.17681	0.39029	20.3573	6.42e-06	3.31e-05	139367196	139384553
SLC23A3	ENSG00000213901	-2.2021	1.36727	32.2361	1.37e-08	1.23e-07	219161465	219170095
SLC24A2	ENSG00000155886	-3.43739	0.777919	39.6637	3.02e-10	3.53e-09	19507452	19786928
SLC24A3	ENSG00000185052	2.46839	3.35284	82.4227	1.1e-19	4.03e-18	19212642	19722926
SLC25A23	ENSG00000125648	2.21405	5.25028	134.571	4.1e-31	3.53e-29	6436079	6465203
SLC25A25	ENSG00000148339	2.64455	4.46099	273.898	1.6e-61	1.86e-58	128068201	128109245
SLC28A3	ENSG00000197506	-2.77192	3.10617	16.4747	4.93e-05	0.000202242	84275457	84340758
SLC2A4	ENSG00000181856	4.94717	2.27373	304.474	3.49e-68	6.07e-65	7281718	7288257
SLC30A10	ENSG00000196660	-4.09837	-0.805746	15.8155	6.98e-05	0.000276198	219685427	219958647
SLC30A2	ENSG00000158014	-2.29984	4.05511	8.68241	0.00321296	0.00774857	26037252	26046118
SLC30A3	ENSG00000115194	-2.92822	0.605598	14.9002	0.000113352	0.000420676	27253684	27275817
SLC35D3	ENSG00000182747	-4.7543	-0.660824	13.6822	0.000216502	0.000740395	136922301	136925660
SLC39A5	ENSG00000139540	-5.16049	1.3789	25.0123	5.7e-07	3.7e-06	56230049	56237846
SLC3A1	ENSG00000138079	-2.1729	-1.36578	15.1076	0.000101551	0.000383765	44275458	44321494
SLC45A2	ENSG00000164175	-4.12042	-1.11329	20.7461	5.24e-06	2.77e-05	33944623	33984693
SLC51B	ENSG00000186198	2.54944	-1.43247	73.5964	9.58e-18	2.88e-16	65045387	65053397
SLC5A11	ENSG00000158865	-2.25212	-1.00137	8.97092	0.0027431	0.00677432	24845841	24911628
SLC5A5	ENSG00000105641	-4.20821	0.596595	21.6002	3.36e-06	1.85e-05	17871945	17895174
SLC6A20	ENSG00000163817	-2.3525	-0.638141	8.22832	0.00412417	0.0096436	45755449	45796536
SLC8A1	ENSG00000183023	2.1023	4.46113	85.0185	2.96e-20	1.14e-18	40097270	40611053
SLC8A1-AS1	ENSG00000227028	-2.57985	-0.817111	13.0613	0.000301467	0.000988543	39786453	40255209
SLC8A2	ENSG00000118160	2.42647	0.841996	48.4081	3.46e-12	5.34e-11	47428017	47471893
SLC8A3	ENSG00000100678	2.41158	-1.7046	32.1128	1.45e-08	1.31e-07	70044215	70189070
SLCO1A2	ENSG00000084453	-3.1012	1.9036	12.0284	0.000523952	0.00159136	21264600	21419594
SLCO1B1	ENSG00000134538	-4.27688	-1.48634	16.3412	5.29e-05	0.000215224	21131194	21239796
SLCO4C1	ENSG00000173930	-2.1133	2.02371	9.09086	0.0025689	0.00639869	102233986	102296284
SLCO6A1	ENSG00000205359	-3.77948	-0.835407	14.7252	0.000124374	0.000456224	102371774	102499016
SLIT2	ENSG00000145147	2.60435	3.20412	72.3631	1.79e-17	5.18e-16	20251905	20620561
SLIT3	ENSG00000184347	2.8634	5.6516	125.993	3.09e-29	2.29e-27	168661733	169301139
SLITRK3	ENSG00000121871	2.40675	-0.503459	14.3645	0.000150613	0.000539042	165186720	165197109
SLMAP	ENSG00000163681	2.04707	6.29938	217.406	3.33e-49	1.07e-46	57755450	57930003
SLURP1	ENSG00000126233	3.24496	1.62359	32.0688	1.49e-08	1.33e-07	142740949	142742406
SMC1B	ENSG00000077935	-3.33365	1.70752	33.259	8.07e-09	7.55e-08	45344063	45413619
SMCO2	ENSG00000165935	-2.49125	-0.0614522	28.6334	8.75e-08	6.77e-07	27466810	27502185
SMIM24	ENSG00000095932	-3.15869	0.423384	22.207	2.45e-06	1.38e-05	3473986	3480525
SMKR1	ENSG00000240204	-2.75198	0.54542	27.0166	2.02e-07	1.45e-06	129502531	129512918
SMOC2	ENSG00000112562	2.74964	5.28215	85.787	2e-20	7.88e-19	168441151	168673445
SMPX	ENSG00000091482	3.16832	-0.606728	44.7242	2.27e-11	3.15e-10	21705978	21758116
SMTN	ENSG00000183963	2.93158	6.74935	270.401	9.28e-61	1.01e-57	31064105	31104757
SMTNL1	ENSG00000214872	-2.63881	-0.397719	23.6912	1.13e-06	6.87e-06	57542641	57550274
SNED1	ENSG00000162804	2.13394	2.76691	82.6665	9.71e-20	3.58e-18	240998618	241095568
SNHG25	ENSG00000266402	-2.25949	0.578955	46.5248	9.05e-12	1.33e-10	64145970	64146476
SNORA12	ENSG00000212464	-4.42053	-1.45159	11.8126	0.000588302	0.00176507	100237156	100237302
SNORA26	ENSG00000212588	-2.16667	-0.571558	29.1085	6.84e-08	5.43e-07	52713249	52713370
SNORA53	ENSG00000212443	-4.43574	0.602418	16.7191	4.33e-05	0.000180589	98599635	98599883
SNORA71A	ENSG00000225091	-2.39144	-0.563334	12.9423	0.000321241	0.00104608	38427309	38427442
SNORD104	ENSG00000199753	-2.37997	1.22363	44.5168	2.52e-11	3.48e-10	64146083	64146152
SNORD14E	ENSG00000200879	-3.18671	-0.198821	30.1662	3.97e-08	3.28e-07	123058077	123058161
SNORD15B	ENSG00000207445	-3.29893	-0.810649	17.6102	2.71e-05	0.000119418	75404421	75404566
SNORD17	ENSG00000212232	-5.28741	2.94203	24.5037	7.42e-07	4.72e-06	17962710	17962946
SNORD60	ENSG00000206630	-2.25769	-1.27162	20.6041	5.65e-06	2.96e-05	2155023	2155105
SNORD94	ENSG00000208772	-2.14481	-0.63631	16.1219	5.94e-05	0.000238747	86135870	86136006
SNORD99	ENSG00000221539	-2.08171	0.0465113	35.9901	1.98e-09	2.07e-08	28578749	28578822
SNX10	ENSG00000086300	-2.00047	4.7466	37.9445	7.28e-10	8.08e-09	26291862	26374383
SOBP	ENSG00000112320	3.2808	2.56848	235.17	4.45e-53	2.21e-50	107490106	107661306
SOCS3	ENSG00000184557	2.16062	7.45564	85.3909	2.45e-20	9.52e-19	78356778	78360077
SOD3	ENSG00000109610	2.07235	5.48873	47.6997	4.97e-12	7.54e-11	24789912	24800842
SOHLH1	ENSG00000165643	-7.08784	-0.206553	13.4324	0.00024732	0.000831867	135693407	135704498
SORBS1	ENSG00000095637	3.58438	6.19682	156.016	8.4e-36	1.03e-33	95311771	95561414
SORBS2	ENSG00000154556	3.08583	4.90736	138.338	6.15e-32	5.84e-30	185585444	185956652
SORCS1	ENSG00000108018	4.36514	-0.0467236	133.32	7.69e-31	6.46e-29	106573663	107164534
SOX11	ENSG00000176887	-4.46945	0.680871	34.6785	3.89e-09	3.84e-08	5692384	5701385
SOX17	ENSG00000164736	2.95801	1.53963	215.959	6.88e-49	2.17e-46	54457935	54460892
SOX2-OT	ENSG00000242808	-2.94064	2.00884	12.5706	0.000391856	0.0012373	180989762	181836880
SOX5	ENSG00000134532	2.10464	0.912095	86.0918	1.72e-20	6.83e-19	23529504	24562544
SOX9-AS1	ENSG00000234899	-2.81749	-0.512622	25.1479	5.31e-07	3.48e-06	72067099	72237203
SPACA6P-AS	ENSG00000269959	-2.00513	-1.80419	16.1441	5.87e-05	0.000236105	51685363	51693456
SPAG5	ENSG00000076382	-2.19637	5.90196	71.6904	2.52e-17	7.11e-16	28577565	28599025
SPAG6	ENSG00000077327	-3.24925	-0.722213	11.6736	0.000633944	0.00188588	22345445	22454224
SPARCL1	ENSG00000152583	2.51215	7.35294	103.858	2.17e-24	1.13e-22	87473335	87531061
SPATA17	ENSG00000162814	-2.44833	2.51178	38.1319	6.61e-10	7.42e-09	217631324	217871696
SPATA21	ENSG00000187144	-4.74733	-1.75608	12.805	0.000345697	0.00111279	16387117	16437424
SPC25	ENSG00000152253	-2.06213	3.91916	46.8352	7.72e-12	1.14e-10	168834132	168913371
SPDYC	ENSG00000204710	-6.76976	-0.27476	24.7146	6.65e-07	4.26e-06	65170154	65173244
SPEF1	ENSG00000101222	-2.25947	-0.874423	21.9432	2.81e-06	1.57e-05	3777504	3781448
SPEG	ENSG00000072195	3.3325	4.6316	135.041	3.23e-31	2.82e-29	219434843	219493629
SPINK5	ENSG00000133710	3.55217	5.02467	108.152	2.49e-25	1.39e-23	148025683	148137382
SPINK7	ENSG00000145879	3.46676	0.8575	39.0006	4.24e-10	4.88e-09	148312419	148315922
SPON1	ENSG00000262655	2.28248	5.29136	51.8795	5.9e-13	1.01e-11	13962723	14268133
SPP1	ENSG00000118785	-4.02146	8.15684	31.2743	2.24e-08	1.94e-07	87975650	87983426
SPRR3	ENSG00000163209	2.63172	6.70186	31.982	1.56e-08	1.39e-07	153001747	153003856
SPTA1	ENSG00000163554	-3.2023	-0.218633	9.27811	0.00231908	0.00585672	158610704	158686715
SRD5A2	ENSG00000277893	2.09168	0.804493	14.4625	0.00014298	0.000515012	31522480	31580938
SRL	ENSG00000185739	3.44468	-0.466608	207.661	4.45e-47	1.29e-44	4189374	4242080
SRPX	ENSG00000101955	2.35691	4.41414	55.7824	8.1e-14	1.54e-12	38149336	38220924
SSC4D	ENSG00000146700	-2.01402	1.11564	30.247	3.8e-08	3.16e-07	76389334	76409697
SSC5D	ENSG00000179954	2.50561	4.29305	73.0332	1.27e-17	3.77e-16	55488404	55519099
SSTR1	ENSG00000139874	2.26125	0.0833927	26.7558	2.31e-07	1.62e-06	38207904	38213067
SSX1	ENSG00000126752	-9.16031	0.654616	13.2075	0.000278836	0.00092465	48255392	48267444
ST8SIA2	ENSG00000140557	-2.90936	-0.129044	12.3377	0.000443911	0.00137788	92393881	92468728
ST8SIA6-AS1	ENSG00000204832	-5.21894	0.798657	8.87468	0.00289152	0.00709147	17386919	17445758
STAB2	ENSG00000136011	2.82725	-1.18538	110.249	8.64e-26	5.01e-24	103587273	103766719
STAM-AS1	ENSG00000260589	-2.26197	-0.268455	45.0837	1.89e-11	2.65e-10	17641284	17643878
STARD9	ENSG00000159433	2.23788	2.88576	129.852	4.42e-30	3.47e-28	42575606	42720998
STEAP1B	ENSG00000105889	-2.42626	1.13465	10.8587	0.000983335	0.00277152	22419444	22727613
STIL	ENSG00000123473	-2.48553	4.18632	96.8011	7.67e-23	3.56e-21	47250139	47314147
STK31	ENSG00000196335	-2.62713	1.66312	38.4193	5.71e-10	6.43e-09	23710203	23832513
STOML3	ENSG00000133115	-3.05465	-1.52721	12.2588	0.000463066	0.00142866	38965925	38990859
STON1	ENSG00000243244	2.3102	3.68104	117.41	2.33e-27	1.53e-25	48529383	48598513
STPG3	ENSG00000197768	-2.59034	-1.50455	22.2487	2.4e-06	1.36e-05	137251261	137253483
STRA8	ENSG00000146857	-4.60083	-1.19747	9.7484	0.00179479	0.0046777	135231979	135258492
STRC	ENSG00000242866	-2.22686	-1.08823	13.2702	0.000269656	0.000897958	43599563	43618800
STRIP2	ENSG00000128578	-2.54251	2.78587	43.1789	5e-11	6.6e-10	129434432	129488399
STUM	ENSG00000203685	4.10777	1.94532	119.475	8.24e-28	5.49e-26	226548764	226609230
SUCNR1	ENSG00000198829	-2.45449	1.6254	18.0463	2.16e-05	9.77e-05	151873643	151884619
SULT1B1	ENSG00000173597	-2.62581	2.04434	12.819	0.000343111	0.0011059	69721167	69787961
SULT1E1	ENSG00000109193	-4.25918	3.87348	16.6942	4.39e-05	0.000182774	69841212	69860145
SULT4A1	ENSG00000130540	-3.26463	0.53654	8.47794	0.00359479	0.00854956	43824509	43862513
SUN3	ENSG00000164744	-3.04841	-1.01248	16.1139	5.96e-05	0.000239573	47987148	48029119
SVEP1	ENSG00000165124	2.84221	3.87266	169.091	1.17e-38	1.77e-36	110365248	110579880
SVIL	ENSG00000197321	2.21651	7.05608	130.84	2.68e-30	2.15e-28	29457338	29736959
SYCP2	ENSG00000196074	-2.71937	3.44042	30.7469	2.94e-08	2.49e-07	59863564	59933655
SYNC	ENSG00000162520	2.75517	1.13929	103.111	3.17e-24	1.61e-22	32679906	32703596
SYNE1	ENSG00000131018	2.06072	5.64148	99.7549	1.72e-23	8.42e-22	152121684	152637801
SYNE4	ENSG00000181392	-2.1778	3.87147	25.3066	4.89e-07	3.23e-06	36003307	36008813
SYNGR4	ENSG00000105467	-3.6962	-1.03658	24.3835	7.89e-07	4.97e-06	48364367	48376377
SYNM	ENSG00000182253	4.51332	6.79717	220.527	6.94e-50	2.36e-47	99098217	99135593
SYNPO2	ENSG00000172403	3.77544	6.91059	145.765	1.46e-33	1.49e-31	118850688	119061247
SYPL2	ENSG00000143028	2.96875	0.455842	118.547	1.32e-27	8.66e-26	109466546	109482134
SYT13	ENSG00000019505	-4.89569	1.1412	9.90817	0.00164547	0.00433931	45240302	45286341
SYT14	ENSG00000143469	-2.23036	1.88668	10.0555	0.00151894	0.00404615	209900923	210171389
SYT16	ENSG00000139973	-2.28974	2.01404	14.7749	0.000121139	0.000445297	61811974	62112550
SYT5	ENSG00000129990	-2.57099	0.220548	10.0891	0.00149148	0.00398155	55171196	55180289
TAC3	ENSG00000166863	-4.27048	6.17554	9.16119	0.00247202	0.00619644	57010000	57028883
TACR1	ENSG00000115353	2.30782	0.600939	48.7319	2.93e-12	4.56e-11	75046463	75199520
TACR2	ENSG00000075073	4.45675	2.29274	269.891	1.2e-60	1.22e-57	69403903	69416918
TACR3	ENSG00000169836	4.40371	-0.392284	85.7858	2.01e-20	7.88e-19	103586031	103719985
TAGLN	ENSG00000149591	2.5817	8.59222	72.1416	2e-17	5.73e-16	117199370	117207464
TAGLN3	ENSG00000144834	-3.69566	0.304411	13.4614	0.000243518	0.000821148	111998739	112013887
TARID	ENSG00000227954	3.36173	-0.591735	103.553	2.54e-24	1.31e-22	133502252	133892802
TAS1R3	ENSG00000169962	-2.02201	1.74022	15.1626	9.86e-05	0.000373983	1331280	1335314
TAT	ENSG00000198650	-3.23721	-1.11208	20.4535	6.11e-06	3.17e-05	71565660	71577092
TBR1	ENSG00000136535	-3.38939	-1.44681	13.3344	0.000260583	0.000870916	161416297	161425870
TBX1	ENSG00000184058	-2.52188	4.99225	18.4746	1.72e-05	8.03e-05	19756703	19783593
TBX20	ENSG00000164532	4.37174	-0.174448	109.244	1.44e-25	8.18e-24	35202430	35254100
TBX4	ENSG00000121075	3.24322	1.74441	91.1671	1.32e-21	5.75e-20	61452404	61485110
TBX5	ENSG00000089225	3.02046	1.17673	114.664	9.32e-27	5.83e-25	114353911	114408442
TCAM1P	ENSG00000240280	-4.23159	1.01746	18.2033	1.99e-05	9.13e-05	63849292	63864379
TCAP	ENSG00000173991	-2.28422	2.26647	15.4478	8.48e-05	0.000327798	39665349	39666554
TCEAL2	ENSG00000184905	3.51932	0.823184	53.4113	2.71e-13	4.82e-12	102125679	102140426
TCEAL7	ENSG00000182916	2.33003	1.06775	79.3733	5.14e-19	1.76e-17	103330229	103332326
TCF21	ENSG00000118526	4.03919	2.62451	321.926	5.51e-72	1.6e-68	133889113	133895553
TCF24	ENSG00000261787	-4.08257	-0.974678	62.5364	2.62e-15	5.94e-14	66946501	66962591
TCHH	ENSG00000159450	2.40239	2.01876	29.157	6.67e-08	5.32e-07	152106317	152115454
TCHHL1	ENSG00000182898	-6.25098	-1.25879	9.0801	0.00258406	0.00643092	152084141	152089064
TDO2	ENSG00000151790	-2.47465	3.28527	30.8111	2.84e-08	2.41e-07	155854738	155920406
TDRD12	ENSG00000173809	-2.9313	1.44741	16.1017	6e-05	0.000240894	32719753	32829580
TDRD5	ENSG00000162782	-2.32409	2.48071	12.4294	0.000422633	0.00131914	179591613	179691272
TEDC2	ENSG00000162062	-2.50765	3.53133	80.2476	3.3e-19	1.15e-17	2460086	2464963
TEKT2	ENSG00000092850	-2.06393	-0.407564	12.7998	0.000346648	0.00111461	36084094	36088275
TENM2	ENSG00000145934	-2.96826	4.17059	9.33862	0.00224375	0.00568827	167284799	168264157
TERT	ENSG00000164362	-4.14021	1.65024	41.7653	1.03e-10	1.3e-09	1253147	1295068
TESMIN	ENSG00000132749	-2.3861	2.81467	36.1534	1.82e-09	1.92e-08	68707440	68751520
TEX41	ENSG00000226674	-2.55615	0.755649	16.3454	5.28e-05	0.000214846	144666312	145262988
TEX45	ENSG00000198723	-2.27352	1.54148	15.1031	0.000101795	0.000384603	7492976	7508450
TFR2	ENSG00000106327	-2.83003	2.51732	41.8268	9.97e-11	1.26e-09	100620416	100642779
TG	ENSG00000042832	-2.41872	3.07731	10.4803	0.00120651	0.00331715	132866958	133134903
TGFB1I1	ENSG00000140682	2.30497	5.16065	113.713	1.51e-26	9.28e-25	31471585	31477960
TGM1	ENSG00000092295	2.05029	4.7458	19.4731	1.02e-05	5.01e-05	24249114	24264432
TGM4	ENSG00000163810	-2.21545	-1.82655	12.6863	0.000368336	0.00117457	44874608	44914990
TGM5	ENSG00000104055	2.00142	1.09331	16.8104	4.13e-05	0.00017321	43232590	43266928
TH	ENSG00000180176	-2.47268	3.72101	9.02663	0.00266075	0.00659568	2163929	2171815
THSD4	ENSG00000187720	2.13956	4.64062	96.5595	8.66e-23	4e-21	71096952	71783383
TICRR	ENSG00000140534	-2.01837	3.76369	56.119	6.82e-14	1.32e-12	89575469	89631056
TLE6	ENSG00000104953	-2.29858	2.88979	20.0456	7.56e-06	3.84e-05	2977538	2995179
TLL2	ENSG00000095587	-2.58374	1.23894	20.9378	4.74e-06	2.54e-05	96364608	96513926
TLX2	ENSG00000115297	-3.49914	-0.489315	27.9	1.28e-07	9.52e-07	74513463	74517148
TM4SF19	ENSG00000145107	-4.17707	1.09439	25.0042	5.72e-07	3.72e-06	196319342	196338503
TM4SF19-AS1	ENSG00000235897	-2.55399	-0.0913307	26.3378	2.87e-07	1.98e-06	196318330	196325570
TMEM100	ENSG00000166292	2.84459	1.26052	72.3787	1.78e-17	5.14e-16	55719627	55732121
TMEM108	ENSG00000144868	2.4316	1.84493	51.3102	7.89e-13	1.33e-11	133038391	133397775
TMEM132A	ENSG00000006118	-2.15601	6.63351	53.906	2.1e-13	3.78e-12	60924460	60937159
TMEM132C	ENSG00000181234	4.683	-0.323505	101.558	6.94e-24	3.45e-22	128267403	128707915
TMEM139	ENSG00000178826	-2.4169	3.63589	15.5287	8.13e-05	0.000315468	143279957	143288048
TMEM145	ENSG00000167619	-3.77054	0.443568	36.4827	1.54e-09	1.63e-08	42313309	42325064
TMEM151A	ENSG00000179292	-3.21086	-0.682935	15.3036	9.15e-05	0.000349646	66291894	66296664
TMEM151B	ENSG00000178233	-2.43764	-1.07246	9.90456	0.00164869	0.00434649	44270450	44307506
TMEM191B	ENSG00000278558	-3.6365	-0.440615	31.2248	2.3e-08	1.98e-07	18527802	18530573
TMEM191C	ENSG00000206140	-3.00021	0.0101806	31.9243	1.6e-08	1.43e-07	21466423	21471269
TMEM249	ENSG00000261587	-3.50694	-1.54455	53.1015	3.17e-13	5.6e-12	144352219	144354914
TMEM252	ENSG00000181778	5.14856	-0.825286	98.3142	3.57e-23	1.69e-21	68536580	68540883
TMEM35A	ENSG00000126950	3.07283	1.81671	63.7321	1.43e-15	3.35e-14	101078879	101096367
TMEM52	ENSG00000178821	-2.51757	1.37231	28.3945	9.89e-08	7.59e-07	1917590	1919279
TMEM52B	ENSG00000165685	-4.6641	2.3155	34.9621	3.36e-09	3.36e-08	10170542	10191801
TMEM74B	ENSG00000125895	-3.1892	2.63352	47.7966	4.73e-12	7.19e-11	1180561	1185415
TMOD1	ENSG00000136842	3.43846	2.3864	159.926	1.17e-36	1.59e-34	97501180	97601743
TMPRSS11A	ENSG00000187054	3.85094	2.75759	51.1693	8.47e-13	1.43e-11	67909395	67964140
TMPRSS11B	ENSG00000185873	7.74068	0.920362	66.9949	2.72e-16	6.94e-15	68226653	68245694
TMPRSS11BNL	ENSG00000250026	4.17988	-1.57434	15.3718	8.83e-05	0.000339432	68184081	68218080
TMPRSS11D	ENSG00000153802	2.55298	3.0289	15.5101	8.21e-05	0.000318369	67820876	67884002
TMPRSS11E	ENSG00000087128	2.09427	4.3507	18.3391	1.85e-05	8.56e-05	68447463	68497604
TMPRSS11F	ENSG00000198092	2.7419	-0.688417	10.2305	0.00138139	0.00372892	68053198	68129869
TMPRSS3	ENSG00000160183	-2.82548	3.10612	18.1292	2.06e-05	9.4e-05	42371887	42396091
TMSB15A	ENSG00000158164	-2.49312	1.39491	14.5339	0.000137662	0.000498335	102513682	102516739
TNFAIP8L3	ENSG00000183578	2.44437	2.30043	75.4655	3.72e-18	1.16e-16	51056598	51105276
TNFRSF13B	ENSG00000240505	2.92193	0.0476365	38.6466	5.08e-10	5.78e-09	16929816	16972118
TNN	ENSG00000120332	-2.41908	1.01493	9.84835	0.00169984	0.00446304	175067833	175148075
TNNI3	ENSG00000129991	-6.47284	0.912995	40.0381	2.49e-10	2.96e-09	55151767	55157773
TNNT1	ENSG00000105048	-4.85216	3.46962	37.9252	7.35e-10	8.16e-09	55132698	55149206
TNNT2	ENSG00000118194	3.11187	2.74015	103.233	2.98e-24	1.52e-22	201359008	201377764
TNS1	ENSG00000079308	3.40038	7.44507	179.269	7e-41	1.2e-38	217799588	218033982
TNS2	ENSG00000111077	2.26617	5.65913	170.84	4.85e-39	7.66e-37	53046969	53064379
TNXB	ENSG00000168477	4.26275	4.36102	249.881	2.76e-56	2.08e-53	32041153	32115334
TOP2A	ENSG00000131747	-2.22812	7.63264	54.1644	1.84e-13	3.34e-12	40388525	40417896
TP53INP2	ENSG00000078804	2.24228	5.46521	135.725	2.29e-31	2.01e-29	34704339	34713439
TP73	ENSG00000078900	-2.08811	3.64676	18.5001	1.7e-05	7.93e-05	3652516	3736201
TPM1	ENSG00000140416	2.42702	8.10705	120.09	6.05e-28	4.07e-26	63042632	63071915
TPM2	ENSG00000198467	2.53978	7.97386	91.0004	1.44e-21	6.24e-20	35681992	35690056
TPO	ENSG00000115705	2.08553	-0.674008	11.2994	0.000775321	0.00225397	1374066	1543711
TPPP	ENSG00000171368	3.64563	3.24472	207.28	5.39e-47	1.51e-44	659862	693352
TPRG1	ENSG00000188001	2.31888	2.44338	74.6115	5.73e-18	1.76e-16	188947214	189325304
TPSAB1	ENSG00000172236	2.70098	3.53723	81.6433	1.63e-19	5.88e-18	1240379	1242554
TPSB2	ENSG00000197253	2.46048	3.7547	62.6123	2.52e-15	5.72e-14	1227272	1230184
TPSD1	ENSG00000095917	2.78458	0.536019	36.7039	1.38e-09	1.47e-08	1256059	1259008
TPSG1	ENSG00000116176	3.86464	-1.50207	202.753	5.24e-46	1.44e-43	1221651	1225257
TPX2	ENSG00000088325	-2.47372	7.00932	62.3576	2.86e-15	6.46e-14	31739271	31801805
TREM2	ENSG00000095970	-2.23249	3.13252	27.9173	1.27e-07	9.45e-07	41158506	41163186
TRHDE-AS1	ENSG00000236333	-3.10735	3.84836	12.6168	0.000382291	0.00121173	72249964	72276954
TRIM15	ENSG00000204610	-3.82868	-1.20514	8.89919	0.00285296	0.00700978	30163206	30172693
TRIM17	ENSG00000162931	-2.82766	3.03223	27.0963	1.94e-07	1.39e-06	228407935	228416861
TRIM54	ENSG00000138100	-2.11762	-0.471455	8.7139	0.00315793	0.00764343	27282429	27307439
TRIM55	ENSG00000147573	-2.20841	-1.51791	8.23726	0.0041039	0.00959878	66126896	66175485
TRIM63	ENSG00000158022	3.38463	0.372908	59.5724	1.18e-14	2.49e-13	26051301	26068436
TRIM71	ENSG00000206557	-6.53918	0.176803	16.2503	5.55e-05	0.00022469	32817997	32897824
TRIM72	ENSG00000177238	-3.07208	-0.431414	12.9923	0.000312782	0.00102179	31214091	31231537
TRIML2	ENSG00000179046	-5.23812	-0.0698724	8.41434	0.00372272	0.00882122	188091273	188109603
TRIP13	ENSG00000071539	-2.2047	5.0695	47.0692	6.85e-12	1.02e-10	892884	919357
TROAP	ENSG00000135451	-2.7915	4.72541	81.5076	1.75e-19	6.27e-18	49323236	49331731
TRPC3	ENSG00000138741	2.63201	-0.149038	87.143	1.01e-20	4.09e-19	121874481	121952060
TRPM8	ENSG00000144481	-3.38583	-0.252464	14.7056	0.000125675	0.000460411	233917373	234019522
TSACC	ENSG00000163467	-2.68961	-0.25869	62.5194	2.64e-15	5.98e-14	156337314	156346995
TSPAN18	ENSG00000157570	2.69978	4.00075	134.757	3.73e-31	3.23e-29	44726465	44932423
TSPAN2	ENSG00000134198	2.3718	3.76972	73.2085	1.17e-17	3.45e-16	115048011	115089503
TSPEAR	ENSG00000175894	-2.94297	-0.283654	8.87229	0.00289532	0.00709877	44497893	44711572
TTC23L	ENSG00000205838	-2.02221	0.698663	18.1718	2.02e-05	9.23e-05	34838833	34899456
TTK	ENSG00000112742	-2.48409	4.55214	73.448	1.03e-17	3.09e-16	80003887	80042527
TTLL7	ENSG00000137941	2.00098	3.35654	65.2396	6.63e-16	1.62e-14	83865024	83999150
TTR	ENSG00000118271	-5.2423	4.01103	9.26301	0.00233829	0.00589868	31557009	31598833
TUB	ENSG00000166402	2.18536	2.60469	66.2999	3.87e-16	9.72e-15	8019244	8106243
TUBB3	ENSG00000258947	-2.46446	2.95513	26.3191	2.89e-07	1.99e-06	89921392	89938761
TUBB8	ENSG00000261456	-2.72552	-0.754097	22.2082	2.45e-06	1.38e-05	46888	74163
TUSC5	ENSG00000184811	2.97648	-0.331682	11.1793	0.000827131	0.00238425	1279662	1300978
TWIST2	ENSG00000233608	2.11143	1.52127	35.2376	2.92e-09	2.96e-08	238848032	238910534
UBD	ENSG00000213886	-2.21948	3.54428	9.50882	0.00204487	0.00524917	29555515	29559732
UBE2C	ENSG00000175063	-2.61895	6.46664	72.7798	1.45e-17	4.23e-16	45812576	45816957
UCA1	ENSG00000214049	-2.2457	7.29685	9.20537	0.00241307	0.00606882	15828206	15836328
UCN2	ENSG00000145040	-2.98353	1.69917	31.835	1.68e-08	1.49e-07	48561718	48563781
UCP1	ENSG00000109424	-4.33353	-1.04861	11.9309	0.000552103	0.00166928	140559431	140568961
UGT1A7	ENSG00000244122	2.15183	0.679077	23.061	1.57e-06	9.29e-06	233681938	233773299
UGT2B4	ENSG00000156096	-3.26003	-1.60712	10.3959	0.00126293	0.00345312	69480165	69526014
UHRF1	ENSG00000276043	-2.57954	4.68978	79.8344	4.07e-19	1.4e-17	4903080	4962154
ULBP1	ENSG00000111981	-3.52919	0.436884	44.1112	3.1e-11	4.23e-10	149963943	149973715
ULBP2	ENSG00000131015	-2.64751	3.05295	38.0753	6.81e-10	7.62e-09	149942014	149949235
UNC13A	ENSG00000130477	-2.06184	0.621123	12.9348	0.000322535	0.00104852	17601328	17688365
UNC13C	ENSG00000137766	-3.80642	2.08459	9.0066	0.00269007	0.00666134	53978201	54633414
USH2A	ENSG00000042781	-3.45957	1.68822	13.8108	0.000202169	0.000699083	215622891	216423448
USP2	ENSG00000036672	2.1	1.51437	55.1447	1.12e-13	2.1e-12	119355215	119381711
VAX1	ENSG00000148704	-4.40956	-1.28206	12.4921	0.000408684	0.00128052	117128521	117138301
VAX2	ENSG00000116035	-2.37123	0.702434	19.8742	8.27e-06	4.17e-05	70900576	70965373
VCX	ENSG00000182583	-4.66561	-0.274588	15.7619	7.18e-05	0.000283103	7842262	7844143
VCX3A	ENSG00000169059	-5.3305	-0.347971	10.6683	0.00108989	0.0030354	6533618	6535118
VEGFD	ENSG00000165197	3.32195	1.19586	124.855	5.48e-29	3.98e-27	15345596	15384413
VEPH1	ENSG00000197415	-3.16537	2.19853	27.0785	1.95e-07	1.4e-06	157259742	157533619
VGF	ENSG00000128564	-3.75227	1.97629	30.9403	2.66e-08	2.27e-07	101162509	101165569
VIL1	ENSG00000127831	-6.18333	1.29295	16.5296	4.79e-05	0.000197265	218419121	218453295
VIPR2	ENSG00000106018	3.62173	-0.588623	134.427	4.41e-31	3.77e-29	159028175	159144867
VIT	ENSG00000205221	4.65651	0.993749	90.3445	2e-21	8.58e-20	36696690	36814792
VSIG1	ENSG00000101842	2.08836	2.19987	26.491	2.65e-07	1.84e-06	108044970	108079184
VSIG8	ENSG00000243284	-2.30102	0.74019	8.68631	0.0032061	0.00773523	159854316	159862657
VSTM2A	ENSG00000170419	4.13024	-0.895937	43.1553	5.06e-11	6.66e-10	54542325	54571080
VSTM2L	ENSG00000132821	-2.36043	3.09287	11.2882	0.000780031	0.00226615	37903111	37945350
VSTM4	ENSG00000165633	2.44566	3.66653	132.869	9.66e-31	8.03e-29	49014236	49115522
VWDE	ENSG00000146530	-2.16135	2.26376	11.8128	0.000588241	0.00176507	12330885	12403941
WASIR2	ENSG00000231439	-2.60062	-0.176027	21.2039	4.13e-06	2.24e-05	22910	25123
WDR66	ENSG00000158023	-3.28412	3.66076	32.4289	1.24e-08	1.12e-07	121918592	122003927
WDR93	ENSG00000140527	-2.13132	-0.648772	28.2662	1.06e-07	8.06e-07	89690811	89743638
WFDC1	ENSG00000103175	2.61227	4.0156	121.328	3.24e-28	2.25e-26	84294846	84329844
WFDC21P	ENSG00000261040	-2.41792	5.46423	11.6726	0.000634264	0.00188637	60083566	60091885
WISP1	ENSG00000104415	-2.28227	3.70217	17.3552	3.1e-05	0.000134252	133191039	133231690
WISP2	ENSG00000064205	2.59825	3.12822	40.6897	1.78e-10	2.17e-09	44714844	44728509
WNT16	ENSG00000002745	-2.35911	-0.120996	11.3961	0.000735974	0.00215182	121325367	121341104
WNT3	ENSG00000108379	-2.62199	2.27329	50.4476	1.22e-12	2.01e-11	46762506	46833154
WNT7A	ENSG00000154764	-3.39721	3.01554	16.9194	3.9e-05	0.000164689	13816258	13880071
XAGE2	ENSG00000155622	-6.47629	0.916454	11.2501	0.000796207	0.00230658	52369021	52375680
XCL1	ENSG00000143184	-2.1149	1.69459	18.389	1.8e-05	8.36e-05	168576605	168582069
XKR4	ENSG00000206579	3.45731	-1.12368	43.2965	4.7e-11	6.23e-10	55102028	55542054
XPNPEP2	ENSG00000122121	4.01216	0.943905	101.575	6.88e-24	3.43e-22	129738974	129769536
XRCC2	ENSG00000196584	-2.7434	3.226	99.9941	1.53e-23	7.48e-22	152644776	152676141
YWHAEP7	ENSG00000276715	-2.64687	-0.249389	14.2467	0.000160339	0.000569152	37828305	37884743
ZBED2	ENSG00000177494	-2.12752	2.90229	9.56905	0.00197885	0.00509778	111592900	111595346
ZBED9	ENSG00000232040	-2.11722	1.95585	20.1928	7e-06	3.58e-05	28570535	28616212
ZBTB16	ENSG00000109906	3.82278	1.15766	132.67	1.07e-30	8.75e-29	114059711	114256765
ZCCHC24	ENSG00000165424	2.6853	4.69198	153.848	2.5e-35	2.99e-33	79382325	79445624
ZDHHC19	ENSG00000163958	-2.17337	-1.42387	13.8857	0.000194266	0.000675249	196197452	196211437
ZEB1	ENSG00000148516	2.45744	4.60727	127.01	1.85e-29	1.38e-27	31318495	31529814
ZFP36	ENSG00000128016	2.58526	8.23997	149.793	1.92e-34	2.12e-32	39406847	39409412
ZFPM2	ENSG00000169946	2.60024	2.35987	104.634	1.47e-24	7.76e-23	104590733	105804539
ZIC2	ENSG00000043355	-2.41672	2.29863	10.4109	0.00125274	0.00342796	99981784	99986765
ZIC5	ENSG00000139800	-4.969	0.447534	20.6884	5.4e-06	2.85e-05	99962964	99971909
ZNF114	ENSG00000178150	-4.36736	2.16403	35.6078	2.41e-09	2.48e-08	48270081	48287608
ZNF117	ENSG00000152926	-2.03629	5.91354	20.1059	7.33e-06	3.73e-05	64971772	65006684
ZNF252P-AS1	ENSG00000255559	-2.52459	-0.545202	45.7785	1.32e-11	1.9e-10	145002811	145006046
ZNF350-AS1	ENSG00000269235	-4.3002	4.09619	17.4732	2.91e-05	0.000127216	51949134	51981367
ZNF432	ENSG00000256087	-2.04106	5.23139	20.5015	5.96e-06	3.1e-05	52031378	52095738
ZNF488	ENSG00000265763	-2.90424	3.72325	25.1691	5.25e-07	3.45e-06	47365496	47384293
ZNF492	ENSG00000229676	-2.79927	0.552733	12.7123	0.000363255	0.0011607	22634324	22667671
ZNF536	ENSG00000198597	2.18363	-0.178957	15.6258	7.72e-05	0.000301688	30228290	30713538
ZNF556	ENSG00000172000	-3.47595	1.30894	18.2664	1.92e-05	8.87e-05	2867335	2883445
ZNF670-ZNF695	ENSG00000135747	-3.06792	-0.994675	64.6997	8.72e-16	2.11e-14	246945547	247078811
ZNF695	ENSG00000197472	-3.32804	1.25649	78.0242	1.02e-18	3.35e-17	246945547	247008093
ZNF726	ENSG00000213967	-2.23964	3.46089	34.5666	4.12e-09	4.05e-08	23914876	23945159
ZNF730	ENSG00000183850	-3.22062	0.369753	19.921	8.07e-06	4.08e-05	23075210	23147221
ZNF732	ENSG00000186777	-2.20978	-0.317465	11.0371	0.000893046	0.00255097	270675	305474
ZP1	ENSG00000149506	-2.5828	-0.204105	16.5993	4.62e-05	0.000190819	60867562	60875693
ZPLD1	ENSG00000170044	-4.42813	-1.26552	18.3942	1.8e-05	8.34e-05	102099244	102479841
ZWINT	ENSG00000122952	-2.26032	5.72986	73.3044	1.11e-17	3.31e-16	56357227	56361273

## Sheet: S3 Table
Supplementary Table S3. List of 167 (116 amplified, and 51 deleted) significant CNV aberrations detected by GAIA analysis in on chr19 in BCa.
		Hg19		Hg38
Aberration Kind	Chromosome	Region Start [bp]	Region End [bp]	Region Start [bp]	Region End [bp]	q-value
Del	chr19	284018	6882409	284018	6882398	0
Del	chr19	7185292	7185473	7185281	7185462	0
Del	chr19	7304492	7344986	101646399	101686891	0
Del	chr19	7451300	7451876	7386414	7386990	0
Del	chr19	7552825	7553021	7487939	7488135	0
Del	chr19	7555092	7558024	7490206	7493138	0
Amp	chr19	29224425	33769543	28733518	33278637	0
Amp	chr19	33836195	33868979	33345289	33378073	0
Amp	chr19	33889369	34019685	33398463	33528779	0
Amp	chr19	34035676	34070265	33544770	33579359	0
Amp	chr19	34459407	34504738	33968502	34013833	0
Amp	chr19	34749087	35337534	34258182	34846630	0
Amp	chr19	35357338	36388042	34866434	35897140	0
Amp	chr19	36395096	36574798	35904194	36083896	0
Amp	chr19	36665110	36853440	36174208	36362538	0
Amp	chr19	36859436	36921398	36368534	36430496	0
Amp	chr19	36931957	36964781	36441055	36473879	0
Amp	chr19	37088382	40809851	36597480	40303944	0
Del	chr19	7150069	7168933	7150058	7168922	0.000345852
Del	chr19	7222271	7300055	7222260	7300044	0.000345852
Del	chr19	7561723	8072931	7496837	8008047	0.000345852
Amp	chr19	29170706	29215148	28679799	28724241	0.000797472
Amp	chr19	33775868	33832285	33284962	33341379	0.000797472
Amp	chr19	33869175	33887160	33378269	33396254	0.000797472
Amp	chr19	34019755	34035562	33528849	33544656	0.000797472
Amp	chr19	34071403	34271079	33580497	33780174	0.000797472
Amp	chr19	34327429	34455857	33836524	33964952	0.000797472
Amp	chr19	34512751	34609226	34021846	34118321	0.000797472
Amp	chr19	34648541	34655059	34157636	34164154	0.000797472
Amp	chr19	34692587	34740148	34201682	34249243	0.000797472
Amp	chr19	35337765	35345875	34846861	34854971	0.000797472
Amp	chr19	36579308	36621643	36088406	36130741	0.000797472
Amp	chr19	36625587	36656239	36134685	36165337	0.000797472
Amp	chr19	36853492	36853596	36362590	36362694	0.000797472
Amp	chr19	36965076	37086645	36474174	36595743	0.000797472
Amp	chr19	40809954	40974883	40304047	40468976	0.000797472
Del	chr19	6885323	7143933	6885312	7143922	0.00249344
Del	chr19	7169276	7178788	7169265	7178777	0.00249344
Del	chr19	7195015	7219727	7195004	7219716	0.00249344
Del	chr19	7398265	7445633	7333344	7380747	0.00249344
Del	chr19	7460859	7545987	7395973	7481101	0.00249344
Del	chr19	8073464	8117050	8008580	8052166	0.00249344
Del	chr19	8137192	8137902	8072308	8073018	0.00249344
Del	chr19	8330622	8331844	8265738	8266960	0.00249344
Del	chr19	8379294	8396803	8314410	8331919	0.00249344
Del	chr19	8453822	8481765	8388938	8416881	0.00249344
Amp	chr19	28370265	28408176	27879357	27917268	0.00444398
Amp	chr19	28584609	28753350	28093702	28262443	0.00444398
Amp	chr19	28804879	28863178	28313972	28372271	0.00444398
Amp	chr19	29124509	29130465	28633602	28639558	0.00444398
Amp	chr19	29140300	29164962	28649393	28674055	0.00444398
Amp	chr19	34277214	34281444	33786309	33790539	0.00444398
Amp	chr19	34290167	34322659	33799262	33831754	0.00444398
Amp	chr19	34611749	34648313	34120844	34157408	0.00444398
Amp	chr19	34661003	34690545	34170098	34199640	0.00444398
Amp	chr19	40979712	41032478	40473805	40526571	0.00444398
Amp	chr19	28341204	28368500	27850296	27877592	0.00778507
Amp	chr19	28408240	28507586	27917332	28016679	0.00778507
Amp	chr19	28562106	28582042	28071199	28091135	0.00778507
Amp	chr19	28754244	28800495	28263337	28309588	0.00778507
Amp	chr19	28863359	29118443	28372452	28627536	0.00778507
Amp	chr19	29135506	29139520	28644599	28648613	0.00778507
Amp	chr19	34281696	34283340	33790791	33792435	0.00778507
Amp	chr19	41035636	41334738	40529729	40828833	0.00778507
Amp	chr19	53486060	53896633	52982807	53393380	0.00778507
Amp	chr19	54022409	54032729	53519155	53529475	0.00778507
Amp	chr19	55393722	55537773	54882298	55026405	0.00778507
Amp	chr19	55547934	55578756	55036566	55067388	0.00778507
Amp	chr19	55622604	55622741	55111236	55111373	0.00778507
Amp	chr19	55678225	55738181	55166857	55226813	0.00778507
Amp	chr19	28256350	28340294	27765442	27849386	0.0110861
Amp	chr19	28514769	28558514	28023862	28067607	0.0110861
Amp	chr19	41334752	41597908	40828847	41092003	0.0110861
Amp	chr19	44941728	44998773	44437545	44494712	0.0110861
Amp	chr19	45069504	45331730	44566258	44828473	0.0110861
Amp	chr19	45359148	45375798	44855891	44872541	0.0110861
Amp	chr19	45553501	45611854	45050243	45108596	0.0110861
Amp	chr19	45626117	45748244	45122859	45244986	0.0110861
Amp	chr19	45765419	45825698	45262161	45322440	0.0110861
Amp	chr19	45969576	46080275	45466318	45577017	0.0110861
Amp	chr19	46082190	46118029	45578932	45614771	0.0110861
Amp	chr19	52738707	52778741	52235454	52275488	0.0110861
Amp	chr19	52783778	53149489	52280525	52646236	0.0110861
Amp	chr19	53902693	54017258	53399440	53514004	0.0110861
Amp	chr19	54033686	54591325	53530432	54088052	0.0110861
Amp	chr19	54594175	54717301	54090902	54213432	0.0110861
Amp	chr19	54852504	54902331	54341243	54390727	0.0110861
Amp	chr19	55087462	55383051	54575995	54871595	0.0110861
Amp	chr19	55540525	55540581	55029157	55029213	0.0110861
Amp	chr19	55579593	55619460	55068225	55108092	0.0110861
Amp	chr19	55622921	55665689	55111553	55154321	0.0110861
Amp	chr19	55744507	56829471	55233139	56318102	0.0110861
Amp	chr19	56909686	57431135	56398317	56919767	0.0110861
Del	chr19	7178878	7184801	7178867	7184790	0.013384
Del	chr19	7188979	7190290	7188968	7190279	0.013384
Del	chr19	8117636	8136027	8052752	8071143	0.013384
Del	chr19	8138264	8330607	8073380	8265723	0.013384
Del	chr19	8332606	8378891	8267722	8314007	0.013384
Del	chr19	8404991	8453809	8340107	8388925	0.013384
Del	chr19	8483207	8498860	8418323	8433976	0.013384
Del	chr19	9061231	9065632	8950555	8954956	0.0349716
Del	chr19	21717303	21721674	21534501	21538872	0.0349716
Amp	chr19	41598513	41617893	41092608	41111988	0.0447897
Amp	chr19	41997341	41998731	41491433	41492823	0.0447897
Amp	chr19	42177463	42194145	41673535	41690224	0.0447897
Amp	chr19	43112215	43112998	42608063	42608846	0.0447897
Amp	chr19	43973142	44038461	43468990	43534309	0.0447897
Amp	chr19	44842435	44941029	44338283	44436846	0.0447897
Amp	chr19	44999175	45059310	44495114	44556077	0.0447897
Amp	chr19	45352391	45352419	44849134	44849162	0.0447897
Amp	chr19	45376284	45551396	44873027	45048138	0.0447897
Amp	chr19	45612330	45624987	45109072	45121729	0.0447897
Amp	chr19	45748354	45762753	45245096	45259495	0.0447897
Amp	chr19	45833801	45926123	45330543	45422865	0.0447897
Amp	chr19	45967045	45968151	45463787	45464893	0.0447897
Amp	chr19	46080682	46081260	45577424	45578002	0.0447897
Amp	chr19	46139301	46378320	45636043	45875062	0.0447897
Amp	chr19	52259571	52672421	51756318	52169168	0.0447897
Amp	chr19	52690310	52735298	52187057	52232045	0.0447897
Amp	chr19	52780029	52781493	52276776	52278240	0.0447897
Amp	chr19	53149967	53485915	52646714	52982662	0.0447897
Amp	chr19	54593737	54594087	54090464	54090814	0.0447897
Amp	chr19	54902385	55084512	54390781	54573045	0.0447897
Amp	chr19	56829792	56879609	56318423	56368240	0.0447897
Amp	chr19	56892353	56908562	56380984	56397193	0.0447897
Amp	chr19	57431831	57531006	56920463	57019638	0.0447897
Del	chr19	8811115	9060812	8700765	8950136	0.068633
Del	chr19	9069733	9525019	8959057	9414343	0.068633
Del	chr19	10116076	10124806	10005400	10014130	0.068633
Del	chr19	15963786	15964203	15852976	15853393	0.068633
Del	chr19	16492438	16761943	16381627	16651132	0.068633
Del	chr19	16957638	16958133	16846827	16847322	0.068633
Del	chr19	17039327	17060324	16928517	16949514	0.068633
Amp	chr19	28248835	28249082	27757927	27758174	0.0911413
Amp	chr19	41627180	41993630	41121275	41487722	0.0911413
Amp	chr19	42000366	42176756	41494458	41672828	0.0911413
Amp	chr19	42196004	42754175	41692083	42250023	0.0911413
Amp	chr19	43024316	43105373	42520164	42601221	0.0911413
Amp	chr19	43114026	43964744	42609874	43460592	0.0911413
Amp	chr19	44040436	44839739	43536284	44335586	0.0911413
Amp	chr19	45928554	45966057	45425296	45462799	0.0911413
Amp	chr19	46378618	46435809	45875360	45932551	0.0911413
Amp	chr19	51327769	51421979	50824513	50918723	0.0911413
Amp	chr19	51979674	52257673	51476420	51754420	0.0911413
Amp	chr19	52675528	52689673	52172275	52186420	0.0911413
Amp	chr19	56882629	56889833	56371260	56378464	0.0911413
Amp	chr19	57531786	57642782	57020418	57131414	0.0911413
Amp	chr19	57679616	57961219	57168248	57449851	0.0911413
Amp	chr19	58107323	58108165	57595955	57596797	0.0911413
Amp	chr19	58289784	58290009	57778416	57778641	0.0911413
Amp	chr19	58352522	58402042	57841154	57890674	0.0911413
Del	chr19	9526887	10115619	9416211	10004943	0.133487
Del	chr19	10125147	10546696	10014471	10436020	0.133487
Del	chr19	10593042	10595886	10482366	10485210	0.133487
Del	chr19	10638890	10639886	10528214	10529210	0.133487
Del	chr19	11780050	11780324	11669235	11669509	0.133487
Del	chr19	12040283	12044111	11929468	11933296	0.133487
Del	chr19	12096573	12248307	11985758	12137492	0.133487
Del	chr19	12311041	12661178	12200226	12550364	0.133487
Del	chr19	12668223	12873393	12557409	12762579	0.133487
Del	chr19	13857101	14069568	13746287	13958756	0.133487
Del	chr19	15881751	15963695	15770941	15852885	0.133487
Del	chr19	15965530	16489057	15854720	16378246	0.133487
Del	chr19	16765698	16950843	16654887	16840032	0.133487
Del	chr19	16958777	17037785	16847966	16926975	0.133487
Del	chr19	17060800	17306895	16949990	17196086	0.133487
Del	chr19	23393286	23393877	23210484	23211075	0.133487

## Sheet: S4 Table
Supplementary Table S4. Details of miRNA clusters residing on recurrent CNV regions on chr19.
CNV						mirNA cluster
Aberration Kind	Chromosome	Region Start [bp]	Region End [bp]	q-value		mirNA cluster	Region Start [bp]	Region End [bp]	Overlapping [bp]
Amp	chr19	53530432	54088052	0.0110861	Overlapping with	hsa-mir-512-1/mir-519a-2	53666679	53706336	39657
Amp	chr19	53530432	54088052	0.0110861	Overlapping with	hsa-mir-371a/mir-373	53787675	53788773	1098
Del	chr19	13746287	13958756	0.133487	Overlapping with	hsa-mir-24-2/mir-23a	13836287	13836659	372
Amp	chr19	51476420	51754420	0.0911413	Overlapping with	hsa-mir-99b/mir-125a	51692612	51693339	727
Amp	chr19	55233139	56318102	0.0110861	Overlapping with	hsa-mir-6804/mir-6803	55230885	55245250	12111
Del	chr19	284018	6882398	0	Overlapping with	hsa-mir-4745/mir-3187	804940	813653	8713
Del	chr19	284018	6882398	0	Overlapping with	hsa-mir-1227/mir-6789	2234062	2235926	1864
Del	chr19	284018	6882398	0	Overlapping with	hsa-mir-6885/mir-6790	6389638	6392983	3345
Del	chr19	13746287	13958756	0.133487	Overlapping with	hsa-mir-181c/mir-181d	13874699	13875011	312
Amp	chr19	45636043	45875062	0.0447897	Overlapping with	hsa-mir-642a/mir-642b	45674928	45675008	80

## Sheet: S5 Table
Supplementary Table S5. Methylation beta value of 4 probes mapped at CpG island (17.5 kb upstream of C19MC).
Bladder Cancer						Healthy
sample	cg15096240	cg09065632	cg16187069	cg00886824		sample	cg15096240	cg09065632	cg16187069	cg00886824
TCGA-G2-A2EL-01	0.106	0.8029	0.9285	0.8546		TCGA-BL-A13J-11	0.9489	0.9229	0.9357	0.9249
TCGA-KQ-A41O-01	0.1542	0.6631	0.9226	0.7487		TCGA-BT-A20W-11	0.9647	0.8925	0.9583	0.9391
TCGA-GD-A6C6-01	0.2555	0.8137	0.9126	0.9293		TCGA-K4-A5RI-11	0.9503	0.9104	0.9624	0.9296
TCGA-E5-A2PC-01	0.269	0.516	0.3596	0.2613		TCGA-GD-A3OQ-11	0.9707	0.9353	0.9634	0.9391
TCGA-GC-A3RB-01	0.2785	0.4266	0.9443	0.9052		TCGA-GC-A3BM-11	0.9731	0.9118	0.9747	0.9517
TCGA-4Z-AA7R-01	0.2798	0.4047	0.6303	0.6737		TCGA-K4-A3WV-11	0.9724	0.9207	0.9746	0.9565
TCGA-KQ-A41N-01	0.3162	0.3812	0.1708	0.5238		TCGA-CU-A0YN-11	0.9507	0.9066	0.9275	0.937
TCGA-C4-A0EZ-01	0.323	0.8978	0.9226	0.9229		TCGA-BT-A20U-11	0.9624	0.8694	0.9592	0.9511
TCGA-GU-AATQ-01	0.3683	0.5034	0.9432	0.7293		TCGA-BT-A20J-11	0.9518	0.94	0.9518	0.9456
TCGA-DK-A1AA-01	0.3703	0.788	0.9006	0.9342		TCGA-GD-A2C5-11	0.8379	0.8622	0.9727	0.9472
TCGA-K4-A3WV-01	0.3891	0.516	0.2783	0.6129		TCGA-K4-A54R-11	0.9622	0.9307	0.9513	0.9344
TCGA-DK-A3X2-01	0.3931	0.599	0.9633	0.9398		TCGA-BT-A20P-11	0.966	0.9214	0.9689	0.9565
TCGA-H4-A2HQ-01	0.4007	0.535	0.9576	0.9436		TCGA-BT-A2LA-11	0.9753	0.9223	0.9601	0.9552
TCGA-C4-A0F6-01	0.4184	0.5769	0.7844	0.917		TCGA-BT-A20X-11	0.9714	0.9106	0.9633	0.9623
TCGA-CF-A9FL-01	0.4299	0.5868	0.8723	0.7789		TCGA-GC-A6I3-11	0.9665	0.9245	0.9714	0.9267
TCGA-E7-A4IJ-01	0.43	0.5919	0.9301	0.8149		TCGA-GD-A3OP-11	0.9707	0.9441	0.9761	0.9553
TCGA-K4-A4AB-01	0.4549	0.5019	0.7142	0.8353		TCGA-BT-A20V-11	0.9653	0.9289	0.9572	0.9486
TCGA-XF-AAMH-01	0.4596	0.5405	0.2597	0.7914		TCGA-GC-A3WC-11	0.972	0.939	0.9714	0.9527
TCGA-CU-A72E-01	0.4738	0.4798	0.5334	0.7255		TCGA-CU-A0YR-11	0.9506	0.9437	0.9058	0.9362
TCGA-2F-A9KQ-01	0.4874	0.5943	0.6576	0.8361		TCGA-BT-A20R-11	0.9611	0.9273	0.9497	0.9525
TCGA-DK-A1AD-01	0.4879	0.5881	0.4111	0.7948		TCGA-BT-A20N-11	0.9629	0.9145	0.9606	0.948
TCGA-FD-A3SJ-01	0.4906	0.7265	0.9426	0.8559
TCGA-G2-AA3C-01	0.5131	0.6109	0.9477	0.863
TCGA-C4-A0F1-01	0.5139	0.3776	0.4217	0.6867
TCGA-DK-A3X1-01	0.5248	0.6336	0.7374	0.8567
TCGA-BT-A0YX-01	0.5271	0.4654	0.2898	0.7373
TCGA-ZF-AA4U-01	0.5341	0.7165	0.9419	0.9419
TCGA-ZF-A9RE-01	0.5384	0.7274	0.7471	0.795
TCGA-XF-A9ST-01	0.546	0.5644	0.4083	0.7857
TCGA-DK-AA76-01	0.5467	0.8553	0.9699	0.9316
TCGA-DK-AA6P-01	0.5622	0.5835	0.9449	0.8661
TCGA-BT-A20T-01	0.5678	0.729	0.9524	0.9181
TCGA-S5-AA26-01	0.5831	0.9296	0.9525	0.9552
TCGA-ZF-AA4N-01	0.5902	0.8423	0.9436	0.9131
TCGA-XF-A8HE-01	0.5981	0.8581	0.9284	0.927
TCGA-CF-A47X-01	0.6016	0.8258	0.9419	0.8617
TCGA-DK-A3IS-01	0.6051	0.863	0.68	0.914
TCGA-CF-A47T-01	0.6118	0.8433	0.9563	0.946
TCGA-H4-A2HO-01	0.6139	0.6399	0.5139	0.8354
TCGA-BL-A0C8-01	0.636	0.610233	0.5884	0.845333
TCGA-GC-A4ZW-01	0.6384	0.6666	0.8681	0.9112
TCGA-2F-A9KW-01	0.6417	0.6298	0.5853	0.8606
TCGA-GC-A3WC-01	0.649	0.6124	0.5718	0.8297
TCGA-GV-A6ZA-01	0.6546	0.6856	0.8649	0.8579
TCGA-FD-A3B6-01	0.6581	0.8361	0.9659	0.8707
TCGA-XF-A9T8-01	0.6601	0.6828	0.7447	0.8667
TCGA-YC-A9TC-01	0.675	0.5419	0.9393	0.9266
TCGA-GV-A3QH-01	0.6894	0.6149	0.9584	0.9305
TCGA-FD-A6TA-01	0.6979	0.5616	0.972	0.9262
TCGA-ZF-A9R2-01	0.7007	0.5991	0.9598	0.7407
TCGA-GU-A42Q-01	0.704	0.5094	0.9569	0.8923
TCGA-FD-A5BV-01	0.7046	0.6517	0.8739	0.8916
TCGA-C4-A0F0-01	0.7047	0.9123	0.9102	0.9276
TCGA-XF-A9T3-01	0.7265	0.688	0.8994	0.846
TCGA-BT-A20U-01	0.7351	0.8483	0.9546	0.9022
TCGA-E7-A6MD-01	0.7391	0.9105	0.9204	0.937
TCGA-DK-AA6W-01	0.7403	0.8192	0.8988	0.8979
TCGA-GV-A3QG-01	0.7425	0.7463	0.6569	0.9033
TCGA-DK-AA77-01	0.7426	0.7079	0.9308	0.9164
TCGA-BT-A3PJ-01	0.7572	0.7296	0.9386	0.9532
TCGA-DK-A1AC-01	0.7774	0.5856	0.8136	0.9222
TCGA-K4-A5RI-01	0.7844	0.5802	0.9302	0.918
TCGA-2F-A9KO-01	0.7938	0.755	0.9535	0.9327
TCGA-E7-A3X6-01	0.7943	0.7928	0.9618	0.856
TCGA-E7-A5KF-01	0.8049	0.9309	0.9623	0.9462
TCGA-XF-AAMT-01	0.805	0.8621	0.9113	0.9133
TCGA-GC-A3RD-01	0.8105	0.7423	0.9697	0.9554
TCGA-GC-A3BM-01	0.8125	0.4866	0.9643	0.9559
TCGA-KQ-A41P-01	0.8278	0.5653	0.7838	0.8407
TCGA-G2-A3IB-01	0.8286	0.8505	0.9302	0.9571
TCGA-DK-AA6S-01	0.8299	0.7468	0.9491	0.9405
TCGA-XF-A9SJ-01	0.8316	0.7607	0.8268	0.9193
TCGA-FD-A5BX-01	0.833	0.7328	0.9486	0.9488
TCGA-CU-A0YN-01	0.845	0.8676	0.9009	0.9192
TCGA-CF-A5U8-01	0.8502	0.9476	0.9648	0.9333
TCGA-BL-A13I-01	0.8515	0.8055	0.885333	0.902067
TCGA-GU-A42P-01	0.8523	0.7845	0.7995	0.9363
TCGA-CF-A27C-01	0.8601	0.6388	0.9618	0.9502
TCGA-PQ-A6FI-01	0.8681	0.8378	0.9342	0.922
TCGA-BT-A20O-01	0.8684	0.712	0.8577	0.9245
TCGA-ZF-AA56-01	0.8765	0.785	0.9574	0.9147
TCGA-DK-A1AG-01	0.8772	0.8033	0.9232	0.8888
TCGA-GV-A3JV-01	0.8789	0.8233	0.9647	0.9544
TCGA-GV-A40G-01	0.8846	0.7525	0.971	0.949
TCGA-HQ-A5ND-01	0.8885	0.4254	0.9185	0.9534
TCGA-DK-AA75-01	0.8888	0.8312	0.7919	0.903
TCGA-ZF-A9RC-01	0.89	0.9235	0.9381	0.939
TCGA-FD-A3SM-01	0.8916	0.7008	0.6492	0.9188
TCGA-GU-A763-01	0.8927	0.9227	0.9626	0.9316
TCGA-BT-A2LA-01	0.8946	0.5153	0.9242	0.8772
TCGA-ZF-A9RF-01	0.895	0.6994	0.9531	0.936
TCGA-BT-A20N-01	0.8976	0.7901	0.9631	0.953
TCGA-DK-A3WX-01	0.9011	0.739	0.8513	0.952
TCGA-DK-A1A7-01	0.9017	0.6147	0.923	0.9232
TCGA-DK-A2I2-01	0.902	0.6567	0.9503	0.9228
TCGA-CU-A3YL-01	0.9045	0.852	0.9735	0.9565
TCGA-HQ-A5NE-01	0.9067	0.8437	0.9187	0.9284
TCGA-CU-A3KJ-01	0.9113	0.6999	0.8831	0.8651
TCGA-UY-A78K-01	0.914	0.8865	0.9548	0.9419
TCGA-FD-A5BU-01	0.9165	0.9233	0.9661	0.9509
TCGA-LT-A5Z6-01	0.9172	0.8434	0.9288	0.9271
TCGA-DK-A1AE-01	0.9182	0.9115	0.9438	0.9476
TCGA-XF-AAN7-01	0.9209	0.8766	0.8629	0.9462
TCGA-FD-A43U-01	0.924	0.8373	0.9762	0.9443
TCGA-4Z-AA84-01	0.9249	0.8422	0.9494	0.9242
TCGA-CF-A47S-01	0.9266	0.8764	0.9722	0.9522
TCGA-ZF-AA5H-01	0.928	0.8484	0.8953	0.9091
TCGA-XF-A8HG-01	0.9286	0.928	0.9188	0.9239
TCGA-GU-A764-01	0.9301	0.9069	0.8986	0.9308
TCGA-XF-A8HB-01	0.9301	0.9338	0.9538	0.9423
TCGA-4Z-AA89-01	0.931	0.8181	0.9734	0.9325
TCGA-XF-A8HD-01	0.9315	0.9135	0.9367	0.9306
TCGA-BT-A0S7-01	0.9316	0.9116	0.8886	0.9322
TCGA-BT-A20X-01	0.9321	0.9171	0.9491	0.9496
TCGA-UY-A78M-01	0.9323	0.8833	0.8851	0.9151
TCGA-5N-A9KI-01	0.9326	0.9597	0.9056	0.9182
TCGA-4Z-AA86-01	0.9355	0.9445	0.9495	0.9153
TCGA-YC-A89H-01	0.9359	0.8363	0.9606	0.8507
TCGA-FD-A3B5-01	0.9359	0.8971	0.9736	0.9302
TCGA-FD-A5BS-01	0.9359	0.8703	0.9637	0.9405
TCGA-XF-A9SG-01	0.9371	0.9659	0.9389	0.9188
TCGA-FD-A3SP-01	0.9376	0.8713	0.9654	0.9424
TCGA-ZF-AA4T-01	0.9389	0.8967	0.6694	0.9386
TCGA-BL-A3JM-01	0.9393	0.7946	0.9643	0.929
TCGA-XF-AAMQ-01	0.9397	0.6913	0.9314	0.934
TCGA-KQ-A41R-01	0.9401	0.9511	0.8864	0.9253
TCGA-K4-A5RJ-01	0.9406	0.8076	0.9643	0.9365
TCGA-BT-A42C-01	0.9408	0.877	0.9546	0.9443
TCGA-BT-A20P-01	0.9422	0.8161	0.9578	0.95
TCGA-CF-A7I0-01	0.9433	0.6085	0.8968	0.8562
TCGA-C4-A0F7-01	0.9433	0.943	0.8736	0.9212
TCGA-DK-A1A3-01	0.9438	0.7644	0.9219	0.924
TCGA-FD-A5C1-01	0.9442	0.8955	0.9465	0.9349
TCGA-XF-A9T6-01	0.9443	0.9534	0.8335	0.9269
TCGA-G2-A2EJ-01	0.9444	0.9091	0.9348	0.9485
TCGA-FD-A3B7-01	0.9455	0.836	0.9744	0.9542
TCGA-XF-AAMG-01	0.9459	0.8794	0.9525	0.9419
TCGA-FD-A5BY-01	0.9462	0.921	0.9741	0.9498
TCGA-FD-A3SL-01	0.9465	0.9045	0.982	0.9529
TCGA-FD-A3N6-01	0.9466	0.9289	0.9431	0.8101
TCGA-DK-AA71-01	0.9467	0.8718	0.9675	0.9099
TCGA-XF-A9SY-01	0.9471	0.9161	0.9446	0.9311
TCGA-4Z-AA81-01	0.9485	0.8353	0.9652	0.9182
TCGA-UY-A78N-01	0.9489	0.8837	0.9466	0.9378
TCGA-FD-A6TC-01	0.9489	0.8328	0.9597	0.9445
TCGA-FD-A3B8-01	0.9492	0.9015	0.9701	0.9409
TCGA-E7-A7XN-01	0.9503	0.747	0.9351	0.9076
TCGA-XF-AAMW-01	0.9504	0.9216	0.9374	0.9324
TCGA-XF-A9T2-01	0.9504	0.9371	0.9627	0.9539
TCGA-ZF-AA53-01	0.952	0.9178	0.9307	0.9066
TCGA-FD-A6TD-01	0.9525	0.8769	0.9617	0.9332
TCGA-UY-A78P-01	0.9525	0.9316	0.9232	0.934
TCGA-XF-AAMR-01	0.9529	0.9331	0.9467	0.9225
TCGA-XF-AAML-01	0.953	0.9662	0.8716	0.9161
TCGA-E7-A8O7-01	0.9531	0.9384	0.9236	0.9426
TCGA-G2-A2EO-01	0.9533	0.772	0.9642	0.9598
TCGA-UY-A8OC-01	0.9534	0.9694	0.9492	0.9399
TCGA-UY-A8OD-01	0.9537	0.9595	0.9403	0.9136
TCGA-KQ-A41S-01	0.9538	0.8928	0.9362	0.935
TCGA-XF-AAN3-01	0.9541	0.9507	0.9629	0.9256
TCGA-CF-A3MF-01	0.9543	0.9294	0.9714	0.9238
TCGA-BT-A3PH-01	0.9543	0.9161	0.9621	0.9598
TCGA-KQ-A41Q-01	0.9545	0.83	0.9661	0.9302
TCGA-GC-A3OO-01	0.9545	0.9215	0.9729	0.9508
TCGA-FD-A3N5-01	0.9546	0.9166	0.9473	0.9084
TCGA-XF-AAME-01	0.9547	0.9161	0.9159	0.9
TCGA-2F-A9KR-01	0.9547	0.7617	0.9623	0.9382
TCGA-XF-A9SP-01	0.9552	0.8091	0.9605	0.9288
TCGA-FD-A5BR-01	0.9553	0.9089	0.9629	0.9464
TCGA-4Z-AA7Q-01	0.9555	0.8951	0.9172	0.9311
TCGA-BL-A13J-01	0.955667	0.9233	0.964833	0.937867
TCGA-ZF-A9RG-01	0.9558	0.8813	0.9443	0.9175
TCGA-E7-A7PW-01	0.956	0.9039	0.9333	0.9304
TCGA-K4-A4AC-01	0.9561	0.8968	0.9584	0.9434
TCGA-E7-A541-01	0.9563	0.9433	0.9574	0.9456
TCGA-CU-A0YR-01	0.9564	0.9079	0.9377	0.9303
TCGA-DK-AA6X-01	0.9566	0.9629	0.9472	0.9366
TCGA-CU-A0YO-01	0.9569	0.9598	0.9301	0.9352
TCGA-XF-A9SI-01	0.957	0.8757	0.9664	0.9438
TCGA-BT-A42B-01	0.9573	0.9146	0.9569	0.9499
TCGA-FJ-A871-01	0.9575	0.9288	0.9393	0.9415
TCGA-CU-A5W6-01	0.9577	0.8758	0.9575	0.9432
TCGA-K4-A6FZ-01	0.9577	0.7904	0.9446	0.9587
TCGA-E7-A8O8-01	0.9578	0.694	0.9603	0.9451
TCGA-DK-A3WW-01	0.9578	0.9162	0.9743	0.9548
TCGA-GU-A762-01	0.9581	0.879	0.9518	0.92
TCGA-DK-A2I6-01	0.9581	0.8272	0.9467	0.9609
TCGA-GC-A6I1-01	0.9582	0.8526	0.9646	0.8948
TCGA-FD-A43X-01	0.9586	0.536	0.9725	0.9562
TCGA-DK-A2I4-01	0.9587	0.8732	0.9502	0.9453
TCGA-CF-A3MI-01	0.959	0.9063	0.9743	0.9591
TCGA-XF-AAN0-01	0.9592	0.7971	0.9354	0.9094
TCGA-ZF-A9RN-01	0.9598	0.954	0.9634	0.9296
TCGA-XF-A9T4-01	0.9598	0.9068	0.9673	0.943
TCGA-ZF-A9RD-01	0.9602	0.9546	0.928	0.9214
TCGA-XF-A8HI-01	0.9602	0.8397	0.9686	0.9459
TCGA-DK-A1AF-01	0.9603	0.9402	0.9438	0.933
TCGA-XF-A8HF-01	0.9604	0.9217	0.9456	0.9396
TCGA-CF-A8HY-01	0.9605	0.7363	0.9542	0.9373
TCGA-FD-A6TF-01	0.9606	0.94	0.9583	0.9184
TCGA-E7-A85H-01	0.9606	0.9315	0.9508	0.9277
TCGA-ZF-A9RL-01	0.9608	0.9162	0.9511	0.9282
TCGA-UY-A78L-01	0.9609	0.7913	0.9477	0.9296
TCGA-K4-AAQO-01	0.9609	0.892	0.964	0.9392
TCGA-FD-A43Y-01	0.961	0.8555	0.9697	0.9452
TCGA-GV-A40E-01	0.9611	0.8723	0.9606	0.9359
TCGA-GV-A3QI-01	0.9611	0.7478	0.9652	0.9492
TCGA-5N-A9KM-01	0.9612	0.935	0.9656	0.9397
TCGA-FD-A6TK-01	0.9612	0.861	0.9529	0.9405
TCGA-CF-A8HX-01	0.9613	0.9505	0.9172	0.9338
TCGA-CF-A1HS-01	0.9613	0.8853	0.9526	0.942
TCGA-4Z-AA7W-01	0.9617	0.8306	0.9465	0.9345
TCGA-CF-A5UA-01	0.962	0.9148	0.957	0.9409
TCGA-DK-A1A5-01	0.962	0.8996	0.9396	0.9435
TCGA-4Z-AA7O-01	0.9621	0.8739	0.9305	0.9333
TCGA-UY-A78O-01	0.9621	0.8706	0.9628	0.9435
TCGA-FD-A5C0-01	0.9623	0.9119	0.9616	0.9282
TCGA-XF-AAMY-01	0.9623	0.9443	0.9674	0.9389
TCGA-XF-AAN8-01	0.9624	0.9293	0.9454	0.9179
TCGA-XF-AAMX-01	0.9624	0.9219	0.9442	0.9216
TCGA-ZF-A9R5-01	0.9624	0.959	0.9516	0.9363
TCGA-FD-A43P-01	0.9624	0.9374	0.9729	0.9564
TCGA-4Z-AA7N-01	0.9625	0.8975	0.9455	0.9391
TCGA-DK-AA6Q-01	0.9626	0.6432	0.9284	0.8981
TCGA-FD-A3SR-01	0.9627	0.9488	0.9673	0.9548
TCGA-XF-A9SW-01	0.9628	0.9518	0.9393	0.9035
TCGA-DK-AA6R-01	0.9629	0.9433	0.9573	0.9523
TCGA-XF-AAN2-01	0.963	0.8977	0.9211	0.9375
TCGA-XF-A9T5-01	0.9632	0.9473	0.9539	0.9211
TCGA-K4-A83P-01	0.9632	0.9386	0.953	0.9232
TCGA-DK-A1AB-01	0.9632	0.8977	0.9563	0.9422
TCGA-YF-AA3M-01	0.9634	0.8687	0.9342	0.9275
TCGA-ZF-AA52-01	0.9635	0.8935	0.9235	0.9249
TCGA-FD-A6TB-01	0.9635	0.8984	0.9626	0.9366
TCGA-R3-A69X-01	0.9635	0.9275	0.9654	0.9487
TCGA-E7-A519-01	0.9638	0.9595	0.9618	0.9371
TCGA-DK-A3WY-01	0.964	0.9349	0.9677	0.9502
TCGA-E7-A7DU-01	0.9641	0.8945	0.9693	0.9414
TCGA-G2-A2EC-01	0.9641	0.94	0.974	0.9671
TCGA-GU-A767-01	0.9643	0.9169	0.9562	0.9091
TCGA-E7-A7DV-01	0.9643	0.7674	0.9608	0.9282
TCGA-CF-A47V-01	0.9644	0.9361	0.9779	0.9489
TCGA-XF-AAN4-01	0.9645	0.9749	0.9464	0.915
TCGA-FD-A43S-01	0.9645	0.9373	0.9745	0.9548
TCGA-XF-AAMZ-01	0.9648	0.9569	0.9328	0.9236
TCGA-BT-A20R-01	0.9649	0.919	0.9438	0.9497
TCGA-XF-A9SM-01	0.965	0.9254	0.9548	0.9164
TCGA-ZF-AA4X-01	0.9651	0.916	0.9672	0.9352
TCGA-ZF-AA5P-01	0.9651	0.8836	0.9489	0.9436
TCGA-ZF-A9R3-01	0.9653	0.9211	0.9673	0.9463
TCGA-XF-A9SK-01	0.9654	0.926	0.9596	0.9416
TCGA-DK-A3IV-01	0.9655	0.8742	0.9568	0.9358
TCGA-CF-A1HR-01	0.9655	0.8948	0.9569	0.9442
TCGA-XF-AAMJ-01	0.9655	0.8862	0.9661	0.9503
TCGA-DK-AA6U-01	0.9656	0.8261	0.9749	0.9546
TCGA-S5-A6DX-01	0.9657	0.8939	0.9759	0.9446
TCGA-XF-AAMF-01	0.9659	0.9468	0.9389	0.9354
TCGA-DK-A1A6-06	0.966	0.7721	0.9689	0.9219
TCGA-XF-A9SZ-01	0.966	0.9157	0.9461	0.9254
TCGA-DK-A1A6-01	0.966	0.7927	0.9632	0.943
TCGA-ZF-A9R1-01	0.9662	0.905	0.9534	0.9256
TCGA-FD-A6TE-01	0.9662	0.9101	0.9668	0.9434
TCGA-E7-A6ME-01	0.9663	0.9198	0.9653	0.9151
TCGA-GC-A3I6-01	0.9665	0.9128	0.9713	0.9454
TCGA-FD-A6TI-01	0.9666	0.9214	0.9743	0.9265
TCGA-G2-A2ES-01	0.9666	0.664	0.9564	0.9503
TCGA-LT-A8JT-01	0.9667	0.9507	0.9403	0.9394
TCGA-DK-A3IK-01	0.9667	0.9101	0.9667	0.9471
TCGA-FD-A3B4-01	0.9668	0.9335	0.9681	0.9377
TCGA-ZF-A9R7-01	0.9668	0.9099	0.9618	0.9415
TCGA-FD-A5BT-01	0.9669	0.9439	0.9731	0.9468
TCGA-SY-A9G0-01	0.967	0.9276	0.965	0.9436
TCGA-DK-AA6T-01	0.9671	0.8851	0.9642	0.9423
TCGA-K4-A54R-01	0.9671	0.9023	0.9687	0.9482
TCGA-GU-A766-01	0.9673	0.9427	0.9628	0.9261
TCGA-K4-A3WS-01	0.9673	0.9306	0.9715	0.9576
TCGA-DK-AA74-01	0.9674	0.9393	0.9552	0.9278
TCGA-XF-A9SU-01	0.9674	0.9113	0.9409	0.9308
TCGA-GC-A6I3-01	0.9675	0.9108	0.9768	0.9516
TCGA-E7-A3Y1-01	0.9677	0.7626	0.9787	0.9434
TCGA-GD-A2C5-01	0.9677	0.9046	0.9753	0.9607
TCGA-XF-A9SL-01	0.9678	0.8945	0.9693	0.9376
TCGA-BT-A20W-01	0.9678	0.9005	0.9663	0.9497
TCGA-BT-A2LB-01	0.9678	0.854	0.9614	0.9511
TCGA-DK-A2HX-01	0.9679	0.9472	0.9591	0.9499
TCGA-FD-A3SQ-01	0.9679	0.9168	0.9683	0.9604
TCGA-ZF-AA58-01	0.968	0.9595	0.9516	0.9328
TCGA-DK-A3IU-01	0.968	0.9166	0.9744	0.945
TCGA-ZF-AA5N-01	0.968	0.9567	0.9582	0.948
TCGA-DK-A3IT-01	0.9681	0.9221	0.9555	0.9365
TCGA-XF-A9SH-01	0.9681	0.9249	0.954	0.9379
TCGA-XF-A8HC-01	0.9681	0.9182	0.9495	0.9597
TCGA-XF-A9SX-01	0.9682	0.901	0.961	0.9318
TCGA-FD-A3SO-01	0.9683	0.9457	0.9687	0.9515
TCGA-GD-A76B-01	0.9684	0.8841	0.9597	0.9206
TCGA-UY-A9PH-01	0.9684	0.7595	0.9744	0.9417
TCGA-E7-A4XJ-01	0.9684	0.9235	0.9663	0.95
TCGA-BT-A20V-01	0.9684	0.9073	0.9691	0.9506
TCGA-BT-A20Q-01	0.9684	0.9041	0.9558	0.9556
TCGA-4Z-AA7Y-01	0.9686	0.9022	0.933	0.908
TCGA-XF-A9SV-01	0.9687	0.9343	0.9652	0.91
TCGA-GV-A3JZ-01	0.9687	0.8425	0.9655	0.9248
TCGA-DK-AA6L-01	0.9688	0.9138	0.972	0.9411
TCGA-ZF-AA4R-01	0.9688	0.9233	0.9773	0.9513
TCGA-XF-AAN1-01	0.9693	0.9186	0.9391	0.9406
TCGA-4Z-AA83-01	0.9693	0.9308	0.9513	0.9442
TCGA-2F-A9KT-01	0.9693	0.9324	0.9457	0.948
TCGA-BT-A42F-01	0.9694	0.8426	0.9774	0.9536
TCGA-E5-A4TZ-01	0.9695	0.8959	0.983	0.919
TCGA-GD-A3OP-01	0.9695	0.9228	0.9689	0.9618
TCGA-G2-AA3B-01	0.9696	0.953	0.9726	0.9405
TCGA-ZF-AA54-01	0.9697	0.9397	0.9604	0.9389
TCGA-E7-A97P-01	0.9697	0.9389	0.9732	0.9486
TCGA-DK-A2I1-01	0.9699	0.9008	0.9724	0.9567
TCGA-FD-A3B3-01	0.9701	0.8835	0.9661	0.9523
TCGA-2F-A9KP-01	0.9703	0.8838	0.9636	0.9322
TCGA-E7-A5KE-01	0.9703	0.9224	0.9663	0.9447
TCGA-UY-A9PB-01	0.9703	0.9237	0.9678	0.9459
TCGA-DK-A3IM-01	0.9703	0.9112	0.9612	0.9527
TCGA-FD-A6TG-01	0.9705	0.9505	0.9557	0.9088
TCGA-FT-A3EE-01	0.9705	0.943	0.9758	0.9539
TCGA-G2-AA3D-01	0.9706	0.94	0.9415	0.9423
TCGA-DK-A3IQ-01	0.9706	0.9368	0.9697	0.9504
TCGA-XF-AAN5-01	0.9708	0.911	0.9621	0.92
TCGA-CF-A3MH-01	0.9708	0.8239	0.9787	0.9446
TCGA-GC-A3RC-01	0.9708	0.9454	0.9753	0.9465
TCGA-ZF-AA51-01	0.9708	0.9494	0.9627	0.9491
TCGA-FD-A3NA-01	0.9708	0.92	0.9705	0.9505
TCGA-BT-A3PK-01	0.9709	0.9169	0.9692	0.9495
TCGA-YC-A8S6-01	0.971	0.9268	0.9722	0.9362
TCGA-G2-A3IE-01	0.9711	0.9127	0.9747	0.9496
TCGA-GU-AATO-01	0.9713	0.9377	0.9454	0.9404
TCGA-ZF-A9R9-01	0.9713	0.9624	0.9706	0.9416
TCGA-ZF-AA4W-01	0.9713	0.9097	0.9741	0.9461
TCGA-4Z-AA7S-01	0.9714	0.9377	0.9628	0.9471
TCGA-E7-A6MF-01	0.9715	0.9659	0.9654	0.934
TCGA-UY-A9PE-01	0.9716	0.9062	0.974	0.9414
TCGA-ZF-A9R4-01	0.9717	0.8627	0.9504	0.9519
TCGA-PQ-A6FN-01	0.9718	0.9006	0.9675	0.9314
TCGA-MV-A51V-01	0.9718	0.9516	0.9761	0.9544
TCGA-UY-A9PA-01	0.9718	0.8607	0.9572	0.9552
TCGA-G2-A2EK-01	0.9718	0.8985	0.9495	0.9618
TCGA-HQ-A2OE-01	0.972	0.8102	0.9764	0.9522
TCGA-DK-A3IN-01	0.9721	0.7928	0.9582	0.957
TCGA-HQ-A2OF-01	0.9722	0.9344	0.9778	0.9391
TCGA-DK-A6B5-01	0.9722	0.8785	0.9702	0.9458
TCGA-DK-A6B6-01	0.9722	0.8076	0.9701	0.9462
TCGA-CF-A47W-01	0.9722	0.9295	0.9803	0.9597
TCGA-G2-AA3F-01	0.9723	0.9105	0.9531	0.933
TCGA-BT-A20J-01	0.9724	0.8715	0.9736	0.9548
TCGA-4Z-AA82-01	0.9725	0.8898	0.9629	0.9531
TCGA-FD-A6TH-01	0.9725	0.9366	0.9771	0.9571
TCGA-FD-A5BZ-01	0.9729	0.9168	0.9704	0.9462
TCGA-GV-A3QK-01	0.973	0.9041	0.9792	0.9471
TCGA-4Z-AA87-01	0.9731	0.8902	0.979	0.9449
TCGA-FD-A3SS-01	0.9734	0.9285	0.9736	0.9386
TCGA-E7-A97Q-01	0.9734	0.8918	0.9797	0.9441
TCGA-FD-A3SN-01	0.9734	0.9183	0.9747	0.9571
TCGA-GU-A42R-01	0.9734	0.8987	0.9325	0.9618
TCGA-SY-A9G5-01	0.9735	0.9415	0.9783	0.9361
TCGA-CF-A47Y-01	0.9735	0.8884	0.9716	0.9468
TCGA-4Z-AA80-01	0.9736	0.8953	0.952	0.9437
TCGA-GV-A3JW-01	0.9736	0.9063	0.9781	0.9603
TCGA-FJ-A3Z9-01	0.9736	0.8526	0.9717	0.9638
TCGA-GV-A3QF-01	0.9736	0.9416	0.9774	0.9685
TCGA-FD-A62S-01	0.9737	0.9062	0.965	0.9484
TCGA-G2-A3VY-01	0.9737	0.9037	0.9805	0.9623
TCGA-ZF-A9R0-01	0.9738	0.9588	0.975	0.9511
TCGA-ZF-AA4V-01	0.9739	0.7614	0.9781	0.9466
TCGA-4Z-AA7M-01	0.9741	0.8903	0.9598	0.9245
TCGA-UY-A9PF-01	0.9741	0.891	0.9711	0.9549
TCGA-G2-A2EF-01	0.9742	0.9124	0.9638	0.9133
TCGA-K4-A6MB-01	0.9742	0.8696	0.975	0.9431
TCGA-XF-A8HH-01	0.9743	0.9271	0.9676	0.9358
TCGA-DK-AA6M-01	0.9744	0.9362	0.9602	0.9342
TCGA-CF-A9FF-01	0.9744	0.8716	0.974	0.9445
TCGA-GD-A3OQ-01	0.9744	0.9022	0.9783	0.9511
TCGA-UY-A8OB-01	0.9744	0.9402	0.978	0.959
TCGA-YF-AA3L-01	0.9745	0.7284	0.9789	0.9509
TCGA-CF-A3MG-01	0.9745	0.9396	0.9717	0.9549
TCGA-E5-A4U1-01	0.9749	0.8825	0.9618	0.9346
TCGA-DK-A3IL-01	0.9749	0.9389	0.9713	0.9567
TCGA-FD-A43N-01	0.9751	0.8434	0.977	0.951
TCGA-GV-A3JX-01	0.9751	0.9067	0.9819	0.9541
TCGA-K4-A5RH-01	0.9755	0.9231	0.9685	0.9479
TCGA-CF-A9FM-01	0.9755	0.9466	0.9804	0.9561
TCGA-XF-A9T0-01	0.9758	0.8433	0.9732	0.9516
TCGA-LC-A66R-01	0.9759	0.892	0.9579	0.9421
TCGA-E7-A678-01	0.9761	0.9653	0.9671	0.948
TCGA-GC-A3YS-01	0.9763	0.9364	0.9727	0.9542
TCGA-ZF-A9RM-01	0.9764	0.9468	0.9717	0.9493
TCGA-FJ-A3ZF-01	0.9766	0.8527	0.9807	0.9616
TCGA-GU-AATP-01	0.9767	0.9541	0.98	0.934
TCGA-CU-A3QU-01	0.9768	0.91	0.9721	0.9374
TCGA-DK-A6B0-01	0.9771	0.9399	0.9743	0.947
TCGA-BT-A42E-01	0.9772	0.8942	0.9772	0.9507
TCGA-CF-A9FH-01	0.9775	0.951	0.9767	0.9511
TCGA-FJ-A3ZE-01	0.9775	0.9563	0.9696	0.9568
TCGA-K4-A3WU-01	0.9777	0.864	0.9698	0.9491
TCGA-GD-A3OS-01	0.9778	0.9368	0.9765	0.8045
TCGA-BL-A5ZZ-01	0.9784	0.9105	0.9627	0.9407
TCGA-FT-A61P-01	0.9786	0.9607	0.9672	0.9495
TCGA-E7-A677-01	0.979	0.9592	0.9642	0.9558
TCGA-UY-A9PD-01	0.979	0.9222	0.9768	0.9647
TCGA-FD-A62P-01	0.9791	0.9062	0.9673	0.9334
TCGA-FD-A62N-01	0.9795	0.9136	0.9694	0.9369
TCGA-BT-A2LD-01	0.9796	0.9029	0.9828	0.959
TCGA-FJ-A3Z7-01	0.9819	0.9183	0.9795	0.965
TCGA-DK-A6B2-01	0.9826	0.9442	0.9779	0.9499
TCGA-DK-A6AW-01	0.9842	0.9096	0.9735	0.9527
TCGA-DK-A6AV-01	0.9845	0.8812	0.9817	0.9575
TCGA-DK-A6B1-01	0.985	0.945	0.9766	0.9463
TCGA-FD-A62O-01	0.985	0.9254	0.9749	0.951

## Sheet: S6 Table
Supplementary Table S6. C19MC targeted genes and their expression in BCa.
Target gene	LogFC Expression	Ensembl ID
APOA2	-9.5405	ENSG00000158874
FABP1	-9.40531	ENSG00000163586
APOH	-7.84689	ENSG00000091583
CGB3	-7.28428	ENSG00000104827
KRT81	-7.18343	ENSG00000205426
IL37	-6.42575	ENSG00000125571
FOXA2	-6.31911	ENSG00000125798
HMGA2	-6.30829	ENSG00000149948
VIL1	-6.18333	ENSG00000127831
BEST3	-5.90553	ENSG00000127325
ARX	-5.8825	ENSG00000004848
IBSP	-5.708	ENSG00000029559
DGKK	-5.60703	ENSG00000274588
B4GALNT2	-5.55819	ENSG00000167080
FGF8	-5.52892	ENSG00000107831
MTNR1B	-5.30174	ENSG00000134640
TTR	-5.2423	ENSG00000118271
TRIML2	-5.23812	ENSG00000179046
LHX1	-5.1445	ENSG00000273706
A1CF	-5.12668	ENSG00000148584
MAGEA11	-5.0957	ENSG00000185247
NEFL	-4.98885	ENSG00000277586
ACTBL2	-4.97979	ENSG00000169067
ZIC5	-4.969	ENSG00000139800
IGF2BP1	-4.9188	ENSG00000159217
FOLR1	-4.9162	ENSG00000110195
TNNT1	-4.85216	ENSG00000105048
CALB1	-4.85162	ENSG00000104327
KRTAP2-3	-4.83544	ENSG00000212724
PAGE5	-4.77472	ENSG00000158639
SLC35D3	-4.7543	ENSG00000182747
FOXB1	-4.74463	ENSG00000171956
IGF2BP3	-4.72415	ENSG00000136231
EN2	-4.6057	ENSG00000164778
STRA8	-4.60083	ENSG00000146857
CASP14	-4.49367	ENSG00000105141
GCM1	-4.47717	ENSG00000137270
ZPLD1	-4.42813	ENSG00000170044
GAL	-4.30631	ENSG00000069482
AMBP	-4.25519	ENSG00000106927
CDKN2A	-4.22933	ENSG00000147889
TERT	-4.14021	ENSG00000164362
SLC30A10	-4.09837	ENSG00000196660
MMP13	-3.97658	ENSG00000137745
HNF4A	-3.85077	ENSG00000101076
HEPHL1	-3.81085	ENSG00000181333
UNC13C	-3.80642	ENSG00000137766
GRIN2D	-3.79981	ENSG00000105464
DDC	-3.73959	ENSG00000132437
CST6	-3.6991	ENSG00000175315
IGDCC3	-3.67647	ENSG00000174498
PNPLA3	-3.66907	ENSG00000100344
LRP2	-3.58371	ENSG00000081479
MYPN	-3.5782	ENSG00000138347
RDM1	-3.52502	ENSG00000278023
PIWIL1	-3.51508	ENSG00000125207
LGR5	-3.50029	ENSG00000139292
PDZK1	-3.48989	ENSG00000174827
CDX1	-3.47874	ENSG00000113722
USH2A	-3.45957	ENSG00000042781
SLC24A2	-3.43739	ENSG00000155886
CELF5	-3.42752	ENSG00000161082
DRAXIN	-3.42022	ENSG00000162490
FOXL2	-3.40004	ENSG00000183770
CNTN5	-3.3907	ENSG00000149972
LYPD8	-3.39062	ENSG00000259823
SHISA2	-3.38047	ENSG00000180730
PLPPR3	-3.35175	ENSG00000129951
CYP4F2	-3.31066	ENSG00000186115
DLX2	-3.28958	ENSG00000115844
ELAVL2	-3.27738	ENSG00000107105
SULT4A1	-3.26463	ENSG00000130540
UGT2B4	-3.26003	ENSG00000156096
NRCAM	-3.25839	ENSG00000091129
HOXC8	-3.24826	ENSG00000037965
ZNF730	-3.22062	ENSG00000183850
CSF2	-3.21512	ENSG00000164400
TMEM151A	-3.21086	ENSG00000179292
APELA	-3.18416	ENSG00000248329
SLC12A3	-3.17303	ENSG00000070915
DNAJB13	-3.15154	ENSG00000187726
NTS	-3.10072	ENSG00000133636
NKX2-8	-3.09354	ENSG00000136327
SEC14L4	-3.07238	ENSG00000133488
FOXD1	-3.04463	ENSG00000251493
OLR1	-2.99399	ENSG00000173391
CLEC12B	-2.98769	ENSG00000256660
UCN2	-2.98353	ENSG00000145040
PRR36	-2.9818	ENSG00000183248
TSPEAR	-2.94297	ENSG00000175894
GPRIN1	-2.92655	ENSG00000169258
SERPINC1	-2.92308	ENSG00000117601
MMP1	-2.9172	ENSG00000196611
CXCL10	-2.91293	ENSG00000169245
CENPA	-2.91009	ENSG00000115163
PTH2R	-2.8677	ENSG00000144407
DKK2	-2.82869	ENSG00000155011
IYD	-2.81461	ENSG00000009765
LAMC2	-2.79543	ENSG00000058085
GPR158	-2.79523	ENSG00000151025
LIPG	-2.78126	ENSG00000101670
CELSR3	-2.77322	ENSG00000008300
SLC28A3	-2.77192	ENSG00000197506
EFNA2	-2.77131	ENSG00000099617
SMKR1	-2.75198	ENSG00000240204
CAMK2N2	-2.73522	ENSG00000163888
HAPLN1	-2.73368	ENSG00000145681
SBK1	-2.71401	ENSG00000188322
INHBA	-2.70979	ENSG00000122641
CTSE	-2.7089	ENSG00000196188
DNAAF3	-2.63184	ENSG00000167646
LHX2	-2.63125	ENSG00000106689
POLQ	-2.61526	ENSG00000051341
PEX5L	-2.59883	ENSG00000114757
SGO1	-2.59736	ENSG00000129810
ERVMER34-1	-2.5822	ENSG00000226887
MEX3A	-2.57729	ENSG00000254726
MEST	-2.57104	ENSG00000106484
RNFT2	-2.54753	ENSG00000135119
STRIP2	-2.54251	ENSG00000128578
E2F7	-2.52882	ENSG00000165891
MELK	-2.52075	ENSG00000165304
PYCR1	-2.51651	ENSG00000183010
FAM111B	-2.51092	ENSG00000189057
TEDC2	-2.50765	ENSG00000162062
SAPCD2	-2.50729	ENSG00000186193
AURKA	-2.50267	ENSG00000087586
TTK	-2.48409	ENSG00000112742
GNG4	-2.47953	ENSG00000168243
EXO1	-2.47482	ENSG00000174371
TDO2	-2.47465	ENSG00000151790
RARRES1	-2.46136	ENSG00000118849
HSD17B1	-2.45916	ENSG00000108786
ASPM	-2.43915	ENSG00000066279
TMEM151B	-2.43764	ENSG00000178233
MATN3	-2.43761	ENSG00000132031
MMP9	-2.43059	ENSG00000100985
KIF4A	-2.42581	ENSG00000090889
KIF18A	-2.42193	ENSG00000121621
RXFP1	-2.41799	ENSG00000171509
RTN4R	-2.40352	ENSG00000040608
ORC1	-2.39984	ENSG00000085840
KIF2C	-2.39245	ENSG00000142945
DNMT3B	-2.37491	ENSG00000088305
FAM227A	-2.36886	ENSG00000184949
BRIP1	-2.3685	ENSG00000136492
MYCN	-2.36742	ENSG00000134323
FRMD5	-2.35657	ENSG00000171877
CCNE1	-2.35542	ENSG00000105173
CDC45	-2.35363	ENSG00000093009
SKA1	-2.3504	ENSG00000154839
KIF14	-2.33111	ENSG00000118193
TDRD5	-2.32409	ENSG00000162782
HES6	-2.32401	ENSG00000144485
OIP5	-2.32225	ENSG00000104147
AUNIP	-2.30083	ENSG00000127423
SYT16	-2.28974	ENSG00000139973
FANCA	-2.28781	ENSG00000187741
CCNE2	-2.27037	ENSG00000175305
RIBC2	-2.2662	ENSG00000128408
SPEF1	-2.25947	ENSG00000101222
MYB	-2.25448	ENSG00000118513
ZNF726	-2.23964	ENSG00000213967
KSR2	-2.23888	ENSG00000171435
SIM2	-2.23805	ENSG00000159263
CENPI	-2.23228	ENSG00000102384
MYLK4	-2.23094	ENSG00000145949
HS3ST3A1	-2.22838	ENSG00000153976
TOP2A	-2.22812	ENSG00000131747
ZNF732	-2.20978	ENSG00000186777
TRIP13	-2.2047	ENSG00000071539
CDT1	-2.19723	ENSG00000167513
CALCR	-2.18487	ENSG00000004948
SLC23A1	-2.17681	ENSG00000170482
SLC3A1	-2.1729	ENSG00000138079
MICB	-2.1728	ENSG00000204516
GINS1	-2.16414	ENSG00000101003
DLGAP5	-2.16406	ENSG00000126787
ASF1B	-2.16178	ENSG00000105011
CBX2	-2.14662	ENSG00000173894
PRR11	-2.13094	ENSG00000068489
IL12RB2	-2.13072	ENSG00000081985
SLCO4C1	-2.1133	ENSG00000173930
MKI67	-2.10218	ENSG00000148773
PRSS8	-2.09927	ENSG00000052344
SCD	-2.09296	ENSG00000099194
HCAR1	-2.08348	ENSG00000196917
RAD51AP1	-2.08332	ENSG00000111247
GALNT6	-2.07815	ENSG00000139629
F2RL2	-2.07234	ENSG00000164220
LCTL	-2.07013	ENSG00000188501
UNC13A	-2.06184	ENSG00000130477
IFI27	-2.05635	ENSG00000165949
KCNK12	-2.05277	ENSG00000184261
ARID3A	-2.04974	ENSG00000116017
ZNF432	-2.04106	ENSG00000256087
PKMYT1	-2.03991	ENSG00000127564
DNAH3	-2.03974	ENSG00000158486
PCLAF	-2.0377	ENSG00000166803
ZNF117	-2.03629	ENSG00000152926
KIF23	-2.02485	ENSG00000137807
APLN	-2.02043	ENSG00000171388
TICRR	-2.01837	ENSG00000140534
HMGB3	-2.01676	ENSG00000029993
PHACTR3	-2.01376	ENSG00000087495
HIC2	-2.01272	ENSG00000169635
CCNB1	-2.00949	ENSG00000134057
NUSAP1	-2.00764	ENSG00000137804
BUB1	-1.98544	ENSG00000169679
WNT2	-1.97674	ENSG00000105989
CEP55	-1.97358	ENSG00000138180
CACNA1A	-1.97102	ENSG00000141837
CDCA7	-1.9668	ENSG00000144354
BRCA2	-1.95884	ENSG00000139618
GALNT14	-1.95846	ENSG00000158089
DTL	-1.94955	ENSG00000143476
HES7	-1.93798	ENSG00000179111
CDCA5	-1.933	ENSG00000146670
ARHGEF38	-1.92937	ENSG00000236699
PPM1N	-1.91897	ENSG00000213889
DDIAS	-1.91883	ENSG00000165490
BIRC5	-1.91234	ENSG00000089685
CCDC73	-1.90594	ENSG00000186714
CIP2A	-1.90586	ENSG00000163507
CENPF	-1.9001	ENSG00000117724
PILRB	-1.89502	ENSG00000121716
CEMIP	-1.8915	ENSG00000103888
CABP7	-1.8814	ENSG00000100314
CDC25A	-1.86813	ENSG00000164045
IFIT3	-1.86536	ENSG00000119917
SLC29A2	-1.864	ENSG00000174669
ZNF737	-1.85478	ENSG00000237440
SIX4	-1.85457	ENSG00000100625
SLFN13	-1.85446	ENSG00000154760
E2F2	-1.85341	ENSG00000007968
VGLL1	-1.8514	ENSG00000102243
ECT2	-1.84941	ENSG00000114346
CHAF1B	-1.8441	ENSG00000159259
ZYG11A	-1.84135	ENSG00000203995
KIF11	-1.83771	ENSG00000138160
MCM2	-1.83589	ENSG00000073111
KNTC1	-1.82794	ENSG00000184445
RAB3IP	-1.81365	ENSG00000127328
ECE2	-1.81096	ENSG00000145194
PPP1R14C	-1.80757	ENSG00000198729
LIPC	-1.78864	ENSG00000166035
ESCO2	-1.78365	ENSG00000171320
ARHGEF39	-1.77619	ENSG00000137135
BMP8B	-1.77263	ENSG00000116985
E2F1	-1.7715	ENSG00000101412
SPDYA	-1.7702	ENSG00000163806
GINS4	-1.76966	ENSG00000147536
PBK	-1.76947	ENSG00000168078
WDHD1	-1.76923	ENSG00000198554
SYT12	-1.76864	ENSG00000173227
DNAH14	-1.76267	ENSG00000185842
SLC19A1	-1.7587	ENSG00000173638
AGMAT	-1.7579	ENSG00000116771
C12orf75	-1.75307	ENSG00000235162
RRM2	-1.74732	ENSG00000171848
SLC28A1	-1.73464	ENSG00000156222
STMN1	-1.73444	ENSG00000117632
SOX4	-1.73427	ENSG00000124766
RTKN2	-1.73097	ENSG00000182010
PACSIN1	-1.72699	ENSG00000124507
SLC5A6	-1.72203	ENSG00000138074
BCL2L2-PABPN1	-1.71921	ENSG00000258643
TRIB3	-1.71666	ENSG00000101255
EPCAM	-1.71285	ENSG00000119888
PHEX	-1.69807	ENSG00000102174
MME	-1.69543	ENSG00000196549
LHX4	-1.69526	ENSG00000121454
ZFP69B	-1.69387	ENSG00000187801
ZGRF1	-1.69254	ENSG00000138658
CIT	-1.69042	ENSG00000122966
RASGEF1A	-1.68661	ENSG00000198915
PRC1	-1.68586	ENSG00000198901
GPR137C	-1.68373	ENSG00000180998
IFIT2	-1.67429	ENSG00000119922
FANCI	-1.67262	ENSG00000140525
ZDHHC23	-1.66769	ENSG00000184307
IGFBP3	-1.66618	ENSG00000146674
CTHRC1	-1.66145	ENSG00000164932
ZNF525	-1.6599	ENSG00000203326
IFI44L	-1.65473	ENSG00000137959
E2F8	-1.65292	ENSG00000129173
LMNB1	-1.64967	ENSG00000113368
ZHX1-C8ORF76	-1.64937	ENSG00000259305
SGO2	-1.64682	ENSG00000163535
SHCBP1	-1.642	ENSG00000171241
LRRIQ3	-1.63082	ENSG00000162620
CHEK1	-1.63075	ENSG00000149554
ZNF682	-1.62825	ENSG00000197124
DONSON	-1.62561	ENSG00000159147
EPHB2	-1.62038	ENSG00000133216
ZNF93	-1.61624	ENSG00000184635
RMI2	-1.61268	ENSG00000175643
ARHGAP11A	-1.60235	ENSG00000198826
CBX8	-1.58066	ENSG00000141570
FBXO2	-1.579	ENSG00000116661
RAB19	-1.57312	ENSG00000146955
ZBTB8B	-1.57174	ENSG00000273274
MFAP2	-1.56257	ENSG00000117122
KPNA2	-1.5612	ENSG00000182481
ZNF681	-1.55817	ENSG00000196172
ZNF92	-1.55754	ENSG00000146757
FAAP24	-1.55133	ENSG00000131944
TIMELESS	-1.54787	ENSG00000111602
TFEC	-1.543	ENSG00000105967
ZNF257	-1.5404	ENSG00000197134
DHCR7	-1.53779	ENSG00000172893
SEC61G	-1.53566	ENSG00000132432
CDH24	-1.53535	ENSG00000139880
CENPO	-1.53461	ENSG00000138092
LY6K	-1.53325	ENSG00000160886
MCM4	-1.53277	ENSG00000104738
SASS6	-1.53158	ENSG00000156876
AGRN	-1.5232	ENSG00000188157
ZSCAN16	-1.52098	ENSG00000196812
MUC1	-1.52061	ENSG00000185499
SOX9	-1.51525	ENSG00000125398
MTHFD1L	-1.51523	ENSG00000120254
PRIM1	-1.51327	ENSG00000198056
ATAD2	-1.51121	ENSG00000156802
ZNF107	-1.50969	ENSG00000196247
CDCA4	-1.50914	ENSG00000170779
SQLE	-1.50819	ENSG00000104549
NCAPG2	-1.50701	ENSG00000146918
PRSS16	-1.5058	ENSG00000112812
FASN	-1.50134	ENSG00000169710
ALDH2	1.50132	ENSG00000111275
DPYSL2	1.50337	ENSG00000092964
SORCS2	1.50598	ENSG00000184985
WEE1	1.51684	ENSG00000166483
MYC	1.52053	ENSG00000136997
PITX1	1.52959	ENSG00000069011
LURAP1	1.53328	ENSG00000171357
HSPA12B	1.53647	ENSG00000132622
CCND2	1.53668	ENSG00000118971
SULT2B1	1.53871	ENSG00000088002
STC1	1.53875	ENSG00000159167
SIK1	1.55199	ENSG00000142178
LPAR1	1.55485	ENSG00000198121
SLC22A3	1.55489	ENSG00000146477
FBXO32	1.55731	ENSG00000156804
ITGA1	1.55807	ENSG00000213949
MEIS2	1.55974	ENSG00000134138
KCNJ8	1.56421	ENSG00000121361
RDH5	1.56964	ENSG00000135437
STARD8	1.57113	ENSG00000130052
MEIS1	1.57147	ENSG00000143995
ADAMTS9	1.5763	ENSG00000163638
TEAD1	1.58634	ENSG00000187079
CX3CL1	1.58867	ENSG00000006210
DUSP4	1.58882	ENSG00000120875
NEURL1B	1.58942	ENSG00000214357
GPM6B	1.59081	ENSG00000046653
ARMCX1	1.6015	ENSG00000126947
GNG11	1.61475	ENSG00000127920
CPEB2	1.62167	ENSG00000137449
PPP1R3B	1.62602	ENSG00000173281
PTPRD	1.63101	ENSG00000153707
RBPMS	1.64041	ENSG00000157110
PLSCR4	1.64049	ENSG00000114698
CD55	1.64351	ENSG00000196352
PTPN5	1.64882	ENSG00000110786
TRIB1	1.65635	ENSG00000173334
TMTC1	1.65851	ENSG00000133687
ASXL3	1.66343	ENSG00000141431
MN1	1.66422	ENSG00000169184
ADAMTS5	1.66952	ENSG00000154736
JCAD	1.67548	ENSG00000165757
GPAT3	1.69342	ENSG00000138678
PKD1	1.70055	ENSG00000008710
AMOTL1	1.70505	ENSG00000166025
RNASE4	1.71293	ENSG00000258818
HPGDS	1.72341	ENSG00000163106
LATS2	1.72683	ENSG00000150457
PPARGC1A	1.72725	ENSG00000109819
NFIA	1.73356	ENSG00000162599
FAT3	1.73795	ENSG00000165323
PCDHGA12	1.74439	ENSG00000253159
PPM1L	1.74693	ENSG00000163590
DNAJB4	1.75222	ENSG00000162616
CAVIN1	1.76085	ENSG00000177469
APOBEC3A	1.76125	ENSG00000128383
ZBTB47	1.77003	ENSG00000114853
CRY2	1.77406	ENSG00000121671
KIAA0513	1.77715	ENSG00000135709
PTGS2	1.77849	ENSG00000073756
STARD13	1.78368	ENSG00000133121
FAM124A	1.78913	ENSG00000150510
ARHGEF26	1.79148	ENSG00000114790
FYCO1	1.79278	ENSG00000163820
JUN	1.79459	ENSG00000177606
C3orf18	1.79604	ENSG00000088543
CD248	1.79718	ENSG00000174807
DYSF	1.79891	ENSG00000135636
SCEL	1.80378	ENSG00000136155
ZNF835	1.81001	ENSG00000127903
TMEM119	1.81863	ENSG00000183160
RGS5	1.82587	ENSG00000143248
THBS1	1.8267	ENSG00000137801
PDGFRA	1.82675	ENSG00000134853
NAP1L3	1.83115	ENSG00000186310
SRF	1.83139	ENSG00000112658
HSPA12A	1.83569	ENSG00000165868
TIPARP	1.83598	ENSG00000163659
FAXC	1.83894	ENSG00000146267
LIFR	1.8439	ENSG00000113594
MLIP	1.84814	ENSG00000146147
VSIG10L	1.85911	ENSG00000186806
PRSS35	1.85933	ENSG00000146250
TSPAN11	1.85941	ENSG00000110900
NRG2	1.86635	ENSG00000158458
BTG2	1.87077	ENSG00000159388
TGFBR3	1.87475	ENSG00000069702
PCDHGB7	1.87862	ENSG00000254122
GCNT3	1.87991	ENSG00000140297
STAC	1.88045	ENSG00000144681
RHOB	1.88523	ENSG00000143878
SPRY1	1.88921	ENSG00000164056
ITM2A	1.89057	ENSG00000078596
PTGER3	1.89854	ENSG00000050628
NTN1	1.90075	ENSG00000065320
KCNQ5	1.90124	ENSG00000185760
TACC2	1.91132	ENSG00000138162
GALNT16	1.91278	ENSG00000100626
SETBP1	1.91663	ENSG00000152217
TSHZ3	1.91843	ENSG00000121297
RASSF3	1.92329	ENSG00000153179
CYGB	1.93779	ENSG00000161544
FOSL1	1.93922	ENSG00000175592
SCUBE3	1.94904	ENSG00000146197
COL4A4	1.94992	ENSG00000081052
CSGALNACT1	1.95232	ENSG00000147408
CYBRD1	1.95499	ENSG00000071967
MAFF	1.95814	ENSG00000185022
RBMS3	1.99137	ENSG00000144642
KLHL13	1.998	ENSG00000003096
PRDM8	2.00556	ENSG00000152784
FLNA	2.0071	ENSG00000196924
COLEC12	2.00759	ENSG00000158270
C1QTNF2	2.01269	ENSG00000145861
CRISPLD2	2.01322	ENSG00000103196
ANKRD29	2.0178	ENSG00000154065
PLPP3	2.01912	ENSG00000162407
SEMA3G	2.02766	ENSG00000010319
ARHGEF37	2.02854	ENSG00000183111
LPP	2.02917	ENSG00000145012
RASD1	2.03458	ENSG00000108551
ANXA6	2.03511	ENSG00000197043
CADM2	2.03642	ENSG00000175161
SLMAP	2.04707	ENSG00000163681
RCAN1	2.05065	ENSG00000159200
CEND1	2.05172	ENSG00000184524
GAS7	2.06256	ENSG00000007237
FAM149A	2.07252	ENSG00000109794
DUSP5	2.07688	ENSG00000138166
HDAC4	2.08241	ENSG00000068024
SLC8A1	2.1023	ENSG00000183023
PELI2	2.11406	ENSG00000139946
PTX3	2.11509	ENSG00000163661
PRKCB	2.12923	ENSG00000166501
NCS1	2.13041	ENSG00000107130
PER1	2.13218	ENSG00000179094
ITGA5	2.13541	ENSG00000161638
THSD4	2.13956	ENSG00000187720
ITPKB	2.14491	ENSG00000143772
CPA6	2.14953	ENSG00000165078
BNC2	2.15208	ENSG00000173068
PRICKLE2	2.15521	ENSG00000163637
SOCS3	2.16062	ENSG00000184557
FGF7	2.17909	ENSG00000140285
TUB	2.18536	ENSG00000166402
ITGA9	2.18722	ENSG00000144668
DCLK1	2.18754	ENSG00000133083
EGR2	2.19161	ENSG00000122877
ANO5	2.21076	ENSG00000171714
SLC25A23	2.21405	ENSG00000125648
OLFML1	2.21416	ENSG00000183801
PDE5A	2.21613	ENSG00000138735
SVIL	2.21651	ENSG00000197321
PER2	2.21894	ENSG00000132326
ILK	2.21959	ENSG00000166333
REEP2	2.23298	ENSG00000132563
RORB	2.23639	ENSG00000198963
CCDC80	2.23975	ENSG00000091986
TP53INP2	2.24228	ENSG00000078804
DLG2	2.24681	ENSG00000150672
PALLD	2.27854	ENSG00000129116
IER3	2.28618	ENSG00000137331
RERG	2.29879	ENSG00000134533
TGFB1I1	2.30497	ENSG00000140682
PRKAA2	2.3173	ENSG00000162409
NHSL2	2.32837	ENSG00000204131
NFIX	2.33912	ENSG00000008441
MYADM	2.34064	ENSG00000179820
CKM	2.34937	ENSG00000104879
EMP1	2.35145	ENSG00000134531
LGI4	2.37214	ENSG00000153902
DDR2	2.37476	ENSG00000162733
TCHH	2.40239	ENSG00000159450
SLITRK3	2.40675	ENSG00000121871
ALDH1B1	2.40804	ENSG00000137124
LYVE1	2.41686	ENSG00000133800
NTNG1	2.41984	ENSG00000162631
MT1A	2.42462	ENSG00000205362
TPM1	2.42702	ENSG00000140416
FBLN2	2.44634	ENSG00000163520
BVES	2.46839	ENSG00000112276
DUSP2	2.47167	ENSG00000158050
DMGDH	2.47859	ENSG00000132837
ADARB1	2.47928	ENSG00000197381
CBX7	2.52315	ENSG00000100307
RAB23	2.53384	ENSG00000112210
LTBP4	2.55287	ENSG00000090006
PDE1A	2.55452	ENSG00000115252
CRISP3	2.55921	ENSG00000096006
CSRP1	2.56342	ENSG00000159176
HMGCLL1	2.58012	ENSG00000146151
ZFP36	2.58526	ENSG00000128016
ZFPM2	2.60024	ENSG00000169946
SLIT2	2.60435	ENSG00000145147
ENPP6	2.60944	ENSG00000164303
TRPC3	2.63201	ENSG00000138741
CCL2	2.65099	ENSG00000108691
HHIP	2.65127	ENSG00000164161
KANK2	2.66987	ENSG00000197256
NACC2	2.67544	ENSG00000148411
LONRF2	2.68538	ENSG00000170500
ESR1	2.70229	ENSG00000091831
CFL2	2.71111	ENSG00000165410
MAP1B	2.73077	ENSG00000131711
OMD	2.74716	ENSG00000127083
SYNC	2.75517	ENSG00000162520
EPHA6	2.75907	ENSG00000080224
PCSK2	2.76283	ENSG00000125851
FBXL7	2.76819	ENSG00000183580
NR4A2	2.77237	ENSG00000153234
GPM6A	2.77404	ENSG00000150625
KCND3	2.78771	ENSG00000171385
CSRNP1	2.78806	ENSG00000144655
PLCB4	2.80373	ENSG00000101333
MAPT	2.80615	ENSG00000186868
CADM3	2.80854	ENSG00000162706
ADCYAP1	2.82199	ENSG00000141433
TMEM100	2.84459	ENSG00000166292
SFRP1	2.84916	ENSG00000104332
SGCD	2.87868	ENSG00000170624
RYR3	2.883	ENSG00000198838
RBM24	2.90133	ENSG00000112183
CHRM3	2.90377	ENSG00000133019
DUSP1	2.90489	ENSG00000120129
KRT4	2.9398	ENSG00000170477
SOX17	2.95801	ENSG00000164736
SYPL2	2.96875	ENSG00000143028
EGR1	2.97726	ENSG00000120738
ADAMTS1	2.98069	ENSG00000154734
GATA6	2.98566	ENSG00000141448
EPHB1	2.9873	ENSG00000154928
GREM2	3.00881	ENSG00000180875
DCHS2	3.01356	ENSG00000197410
SORBS2	3.08583	ENSG00000154556
PTGIS	3.09212	ENSG00000124212
NDNF	3.10219	ENSG00000173376
MYL9	3.10707	ENSG00000101335
MYLK	3.14914	ENSG00000065534
RYR2	3.1512	ENSG00000198626
LMO3	3.16659	ENSG00000048540
SMPX	3.16832	ENSG00000091482
ADCYAP1R1	3.18721	ENSG00000078549
PPP1R12B	3.22452	ENSG00000077157
DMD	3.23437	ENSG00000198947
HIF3A	3.35174	ENSG00000124440
TRIM63	3.38463	ENSG00000158022
JPH2	3.39352	ENSG00000149596
AKAP6	3.43109	ENSG00000151320
IGSF10	3.44325	ENSG00000152580
XKR4	3.45731	ENSG00000206579
MKX	3.4993	ENSG00000150051
SORBS1	3.58438	ENSG00000095637
DGKB	3.59278	ENSG00000136267
GNAO1	3.61124	ENSG00000087258
NR4A3	3.62263	ENSG00000119508
TPPP	3.64563	ENSG00000171368
LMOD1	3.6786	ENSG00000163431
KCNMB1	3.68752	ENSG00000145936
CLEC3A	3.69661	ENSG00000166509
CACNA1H	3.72909	ENSG00000196557
FOSB	3.76642	ENSG00000125740
LRRC2	3.78665	ENSG00000163827
FHL1	3.79053	ENSG00000022267
PRUNE2	3.84346	ENSG00000106772
TPSG1	3.86464	ENSG00000116176
CNN1	3.91115	ENSG00000130176
SERPINB12	3.94178	ENSG00000166634
FGF10	4.01115	ENSG00000070193
BHMT2	4.02521	ENSG00000132840
PSD	4.03335	ENSG00000059915
FAM107A	4.03587	ENSG00000168309
CAMK2A	4.11043	ENSG00000070808
OGN	4.16406	ENSG00000106809
ANGPTL7	4.35132	ENSG00000171819
TACR3	4.40371	ENSG00000169836
MYOCD	4.407	ENSG00000141052
SHISAL1	4.44786	ENSG00000138944
SYNM	4.51332	ENSG00000182253
PDZRN4	4.7703	ENSG00000165966
CLEC3B	4.802	ENSG00000163815
PYGM	4.89397	ENSG00000068976
KCNB1	5.05121	ENSG00000158445
GLP2R	5.24064	ENSG00000065325
LRRC3B	5.34456	ENSG00000179796
MYOC	5.5592	ENSG00000034971
MUC21	5.71145	ENSG00000204544

## Sheet: S7 Table
Supplementary Table S7. Mapping of 42 C19MC target (Tumor suppressors) across 11 types of cancers.
BLCA	BRCA	COAD	HNSC	KICH	KIRC	LUAD	LUSC	PRAD	THCA	UCEC
ADARB1	ADARB1	ADARB1		ADARB1		ADARB1	ADARB1			ADARB1
DNAJB4	DNAJB4	DNAJB4	DNAJB4	DNAJB4	DNAJB4	DNAJB4	DNAJB4	DNAJB4	DNAJB4	DNAJB4
CYGB	CYGB	CYGB				CYGB	CYGB	CYGB		CYGB
FBXO32	FBXO32	FBXO32	FBXO32					FBXO32		FBXO32
LRRC3B	LRRC3B	LRRC3B	LRRC3B			LRRC3B	LRRC3B	LRRC3B		LRRC3B
CNN1	CNN1	CNN1	CNN1	CNN1		CNN1	CNN1	CNN1	CNN1	CNN1
SIK1	SIK1			SIK1	SIK1	SIK1	SIK1	SIK1		SIK1
PPM1L	PPM1L	PPM1L	PPM1L		PPM1L	PPM1L		PPM1L	PPM1L	PPM1L
DMD	DMD	DMD	DMD			DMD	DMD	DMD		DMD
DUSP1	DUSP1	DUSP1	DUSP1	DUSP1		DUSP1	DUSP1	DUSP1	DUSP1	DUSP1
EGR1	EGR1		EGR1	EGR1	EGR1	EGR1	EGR1	EGR1	EGR1	EGR1
EGR2	EGR2		EGR2	EGR2	EGR2	EGR2	EGR2		EGR2	EGR2
EMP1	EMP1	EMP1	EMP1	EMP1	EMP1	EMP1	EMP1	EMP1	EMP1	EMP1
ESR1		ESR1	ESR1	ESR1	ESR1		ESR1	ESR1		ESR1
FHL1	FHL1	FHL1	FHL1	FHL1		FHL1	FHL1	FHL1	FHL1	FHL1
FLNA	FLNA	FLNA		FLNA		FLNA	FLNA	FLNA		FLNA
SYNM	SYNM	SYNM	SYNM			SYNM	SYNM	SYNM	SYNM	SYNM
CADM2	CADM2	CADM2	CADM2	CADM2	CADM2	CADM2	CADM2		CADM2	CADM2
LATS2	LATS2	LATS2	LATS2	LATS2	LATS2	LATS2	LATS2	LATS2	LATS2	LATS2
RBMS3	RBMS3	RBMS3	RBMS3	RBMS3		RBMS3	RBMS3	RBMS3	RBMS3	RBMS3
RASSF3	RASSF3	RASSF3	RASSF3	RASSF3		RASSF3	RASSF3	RASSF3		RASSF3
ILK	ILK	ILK		ILK		ILK	ILK	ILK		ILK
ITGA5						ITGA5	ITGA5	ITGA5		ITGA5
RHOB	RHOB		RHOB	RHOB		RHOB	RHOB	RHOB	RHOB	RHOB
LIFR	LIFR	LIFR	LIFR	LIFR	LIFR	LIFR	LIFR	LIFR	LIFR	LIFR
DDR2	DDR2	DDR2		DDR2	DDR2	DDR2	DDR2	DDR2	DDR2	DDR2
PKD1	PKD1					PKD1	PKD1	PKD1	PKD1	PKD1
PRKAA2	PRKAA2	PRKAA2	PRKAA2	PRKAA2	PRKAA2				PRKAA2	PRKAA2
PRKCB	PRKCB	PRKCB		PRKCB		PRKCB	PRKCB	PRKCB		PRKCB
PTPRD		PTPRD			PTPRD	PTPRD	PTPRD	PTPRD	PTPRD	PTPRD
SFRP1	SFRP1	SFRP1	SFRP1	SFRP1	SFRP1	SFRP1	SFRP1	SFRP1	SFRP1	SFRP1
CSRNP1	CSRNP1	CSRNP1	CSRNP1	CSRNP1	CSRNP1	CSRNP1	CSRNP1	CSRNP1	CSRNP1	CSRNP1
TGFBR3	TGFBR3	TGFBR3	TGFBR3	TGFBR3	TGFBR3	TGFBR3	TGFBR3	TGFBR3	TGFBR3	TGFBR3
THBS1		THBS1		THBS1	THBS1	THBS1	THBS1			THBS1
ZFP36	ZFP36	ZFP36	ZFP36	ZFP36		ZFP36	ZFP36	ZFP36	ZFP36	ZFP36
BTG2	BTG2	BTG2	BTG2	BTG2	BTG2	BTG2	BTG2	BTG2	BTG2	BTG2
NR4A3	NR4A3		NR4A3	NR4A3	NR4A3	NR4A3	NR4A3	NR4A3	NR4A3	NR4A3
PER2	PER2	PER2	PER2	PER2		PER2	PER2	PER2	PER2	PER2
IER3			IER3	IER3	IER3			IER3
SOCS3	SOCS3		SOCS3	SOCS3		SOCS3	SOCS3	SOCS3	SOCS3
STARD13	STARD13	STARD13		STARD13		STARD13	STARD13	STARD13	STARD13	STARD13
SLIT2	SLIT2	SLIT2	SLIT2		SLIT2	SLIT2	SLIT2	SLIT2	SLIT2	SLIT2

## Sheet: S8 Table
Supplementary Table S8. Details of CNV and DNA promoter methylation information of C19MC targeted genes.
Asoociated Genes				CNV					Diffrantial Methyaltion Status (Source: DNMIVD Database) Normal vs Tumor
Gene Name	Chromosome	Region Start [bp]	Region End [bp]	Aberration Kind	Region Start [bp]	Region End [bp]	q-value	Overlapping [bp]	difference	adjusted_pvalue	statistic	DM_type
VIL1	chr2	218419122	218453295	Del	203087860	241536647	0	34173	-0.189276	7.23916e-06	-4.96566	Not Sig
FGF8	chr10	101770108	101776114	Del	87503230	116437725	0	6006	0.0179542	0.420816	0.990266	Not Sig
NEFL	chr8	24950954	24956612	Del	667667	37395954	0	5658	0.135419	0.02021	2.63152	Not Sig
ACTBL2	chr5	57480017	57482811	Del	56915096	57540925	2.3e-05	2794	-0.399797	1.05729e-19	-10.1711	Hypomethylation
CDKN2A	chr9	21967751	21994392	Del	20645241	24593980	0	26641	0.0354504	0.0443656	2.2978	Not Sig
PNPLA3	chr22	43923804	43947582	Del	42671268	44293357	0	23778	0.018513	0.353466	1.12774	Not Sig
CDX1	chr5	150166777	150184558	Del	149701108	152048438	0.0407026	17781	-0.197601	0.000256928	-4.06924	Not Sig
SLC24A2	chr9	19507454	19789037	Del	19642429	19646679	0.00139116	4250	-0.317533	4.36215e-07	-5.57698	Hypomethylation
SLC24A2	chr9	19507454	19789037	Del	19508887	19638329	0.000179655	129442	-0.317533	4.36215e-07	-5.57698	Hypomethylation
SLC24A2	chr9	19507454	19789037	Del	19760155	19828237	0.00139116	28882	-0.317533	4.36215e-07	-5.57698	Hypomethylation
SLC24A2	chr9	19507454	19789037	Del	19647145	19753999	0.0029235	106854	-0.317533	4.36215e-07	-5.57698	Hypomethylation
CELF5	chr19	3224660	3297076	Del	284018	6882398	0	72416	-0.000698914	0.76178	-0.408253	Not Sig
DRAXIN	chr1	11691709	11725857	Del	11715410	11721916	0.110459	6506	0.015461	0.448783	0.93884	Not Sig
PLPPR3	chr19	812487	821955	Del	284018	6882398	0	9468	0.135076	0.0304396	2.46134	Not Sig
CYP4F2	chr19	15878022	15898074	Del	15854720	16378246	0.120027	20052	-0.244671	3.66723e-07	-5.61269	Hypomethylation
ELAVL2	chr9	23690103	23821275	Del	20645241	24593980	0	131172	0.0455391	0.0684118	2.09478	Not Sig
SULT4A1	chr22	43824508	43862513	Del	42671268	44293357	0	38005	0.112025	0.0520102	2.2245	Not Sig
APELA	chr4	164877177	164897527	Del	163638452	165061246	0.0180636	20350	.	.	.	.
FOXD1	chr5	73446265	73448777	Del	71395075	81027752	0	2512	0.039251	0.286567	1.27715	Not Sig
UCN2	chr3	48561717	48563781	Del	43106511	85088114	0	2064	0.0203189	0.495888	0.851865	Not Sig
PRR36	chr19	7868718	7874390	Del	7496837	8008047	0.000345852	5672	.	.	.	.
GPRIN1	chr5	176595801	176610156	Del	173306922	177144088	0	14355	-0.013076	0.21299	-1.47028	Not Sig
PTH2R	chr2	208406791	208494506	Del	203087860	241536647	0	87715	0.129159	0.0117631	2.84507	Not Sig
IYD	chr6	150369011	150405969	Del	150139657	150532461	0.0263771	36958	-0.424391	4.49768e-11	-7.26321	Hypomethylation
LIPG	chr18	49562056	49599185	Del	49594946	49710759	0.0133182	4239	-0.00514251	0.824094	-0.303384	Not Sig
LIPG	chr18	49562056	49599185	Del	49115811	49594113	0.031792	32057	-0.00514251	0.824094	-0.303384	Not Sig
CELSR3	chr3	48636462	48662886	Del	43106511	85088114	0	26424	0.0128896	0.718194	0.480276	Not Sig
EFNA2	chr19	1285872	1301431	Del	284018	6882398	0	15559	-0.000690938	0.954286	-0.0840767	Not Sig
HAPLN1	chr5	83637804	83720855	Del	82330171	85143276	2.3e-05	83051	0.0418819	0.511097	0.824432	Not Sig
TEDC2	chr16	2460108	2464963	Del	605262	5251990	0	4855	-0.0211518	0.00279833	-3.35415	Not Sig
TTK	chr6	80004648	80042527	Del	79883671	80377959	0.110022	37879	0.00215069	0.324635	1.18974	Not Sig
TDO2	chr4	155903695	155920406	Del	155852494	155917543	0.00729078	13848	-0.180922	0.00469444	-3.17926	Not Sig
TDO2	chr4	155903695	155920406	Del	155917908	155963740	0.0180636	2498	-0.180922	0.00469444	-3.17926	Not Sig
KIF18A	chr11	28020618	28108156	Del	28074576	28180976	9.95e-05	33580	-0.00390923	0.0312905	-2.44906	Not Sig
KIF18A	chr11	28020618	28108156	Del	27927841	28072019	0.000369203	51401	-0.00390923	0.0312905	-2.44906	Not Sig
RXFP1	chr4	158521881	158653372	Del	158636624	158663854	0.00413588	16748	0.0481786	0.356115	1.12232	Not Sig
RXFP1	chr4	158521881	158653372	Del	157903856	158634315	0.00729078	112434	0.0481786	0.356115	1.12232	Not Sig
SKA1	chr18	50375045	50394168	Del	50151470	50597391	0.000935436	19123	-0.0135592	4.0918e-10	-6.88818	Not Sig
HES6	chr2	238238266	238240038	Del	203087860	241536647	0	1772	0.000835703	0.92935	0.12822	Not Sig
OIP5	chr15	41309272	41332591	Del	40686528	42725228	0.00460601	23319	-0.00178291	0.372334	-1.08822	Not Sig
AUNIP	chr1	25834005	25859457	Del	25841149	26312653	0.110459	18308	-0.00382529	0.000315627	-4.01258	Not Sig
RIBC2	chr22	45413692	45432509	Del	44296464	48935200	0	18817	-0.0309427	0.366268	-1.10032	Not Sig
SPEF1	chr20	3777503	3781448	Del	3081265	4261124	0.054621	3945	-0.0254813	2.2928e-05	-4.69378	Not Sig
HS3ST3A1	chr17	13494031	13601929	Del	1083981	21402080	0	107898	0.128046	0.0121074	2.83358	Not Sig
SLCO4C1	chr5	102233985	102296284	Del	102217251	102484277	0.000446933	62299	0.0726922	0.166621	1.61861	Not Sig
MKI67	chr10	128096658	128126423	Del	128101314	128190278	0.000126165	25109	-0.00261951	0.0593876	-2.16157	Not Sig
MKI67	chr10	128096658	128126423	Del	127504910	128100626	0	3968	-0.00261951	0.0593876	-2.16157	Not Sig
SCD	chr10	100347232	100364826	Del	87503230	116437725	0	17594	-0.00710281	0.00147047	-3.56174	Not Sig
F2RL2	chr5	76615481	76623403	Del	71395075	81027752	0	7922	-0.0155538	0.647489	-0.593631	Not Sig
ARID3A	chr19	926034	975939	Del	284018	6882398	0	49905	-0.00139551	0.0914563	-1.94981	Not Sig
PKMYT1	chr16	2972850	2980479	Del	605262	5251990	0	7629	-0.000724341	0.184207	-1.55924	Not Sig
CCNB1	chr5	69167149	69178245	Del	58985335	71393612	0	11096	-0.00439091	0.016384	-2.71494	Not Sig
NUSAP1	chr15	41332880	41381046	Del	40686528	42725228	0.00460601	48166	-0.00125104	0.47441	-0.891228	Not Sig
CEP55	chr10	93496611	93529092	Del	87503230	116437725	0	32481	0.000496625	0.814022	0.320123	Not Sig
HES7	chr17	8121570	8124084	Del	1083981	21402080	0	2514	-0.0106999	3.8355e-05	-4.56619	Not Sig
CCDC73	chr11	32602720	32794662	Del	32441030	32936449	0.0106883	191942	-0.0880957	0.00661764	-3.05804	Not Sig
CDC25A	chr3	48157145	48188417	Del	43106511	85088114	0	31272	-0.00706461	0.00489279	-3.16474	Not Sig
IFIT3	chr10	89327306	89342166	Del	87503230	116437725	0	14860	0.0150434	0.429338	0.974313	Not Sig
E2F2	chr1	23506437	23531233	Del	17844851	23922813	0.110459	24796	-0.00268104	0.0748559	-2.04992	Not Sig
KIF11	chr10	92593129	92655395	Del	87503230	116437725	0	62266	-0.00167643	0.0756401	-2.04514	Not Sig
PPP1R14C	chr6	150143043	150250392	Del	150139657	150532461	0.0263771	107349	0.00622411	0.732951	0.456284	Not Sig
ESCO2	chr8	27774553	27805316	Del	667667	37395954	0	30763	-0.00442146	0.0246024	-2.54952	Not Sig
PBK	chr8	27809623	27837817	Del	667667	37395954	0	28194	-0.00850988	0.000821161	-3.73828	Not Sig
STMN1	chr1	25900594	25906991	Del	25841149	26312653	0.110459	6397	-0.0460777	2.82313e-09	-6.54663	Not Sig
IFIT2	chr10	89283693	89308900	Del	87503230	116437725	0	25207	0.0184629	0.259727	1.34364	Not Sig
IFI44L	chr1	78620447	78646145	Del	78439625	79234627	0.110459	25698	0.0241835	0.380399	1.07136	Not Sig
E2F8	chr11	19224062	19241620	Del	456120	27201742	0	17558	-0.00389264	4.52087e-05	-4.52463	Not Sig
SGO2	chr2	200526206	200584096	Del	200521854	200596118	0.0108072	57890	-0.00174626	0.127306	-1.77396	Not Sig
EPHB2	chr1	22710969	22914270	Del	17844851	23922813	0.110459	203301	0.00168643	0.758173	0.4144	Not Sig
ARHGAP11A	chr15	32615503	32639941	Del	32639703	32750632	0.00460601	238	-0.00440137	0.170907	-1.60408	Not Sig
MTHFD1L	chr6	150865701	151101887	Del	150857098	150932279	0.00144963	66578	0.0032054	0.560221	0.739638	Not Sig
MTHFD1L	chr6	150865701	151101887	Del	150933578	151131613	0.0031824	168309	0.0032054	0.560221	0.739638	Not Sig
ARHGAP11A	chr15	32615503	32639941	Del	31664862	32637663	0.00114333	22160	-0.00440137	0.170907	-1.60408	Not Sig
APOA2	chr1	161222291	161223628	Amp	149907993	189745259	0	1337	0.00618937	0.886503	0.200702	Not Sig
APOH	chr17	66212032	66229415	Amp	59836174	76741926	0	17383	-0.238836	2.78897e-09	-6.54876	Hypomethylation
BEST3	chr12	69643359	69699364	Amp	68349161	70386879	0	56005	-0.134779	4.402e-09	-6.46654	Not Sig
ZIC5	chr13	99962963	99971767	Amp	99953747	100622470	0.000379875	8804	0.333136	3.20535e-16	9.07073	Hypermethylation
FOLR1	chr11	72189557	72196323	Amp	67305076	73968610	0	6766	-0.2102	6.42247e-08	-5.9613	Hypomethylation
TNNT1	chr19	55132793	55149206	Amp	55111553	55154321	0.0100148	16413	-0.0611162	0.000514377	-3.87486	Not Sig
CALB1	chr8	90058607	90082879	Amp	79258005	144177593	0	24272	0.0239105	0.346295	1.1424	Not Sig
GAL	chr11	68684543	68691175	Amp	67305076	73968610	0	6632	0.030972	0.279032	1.29614	Not Sig
TERT	chr5	1253166	1295068	Amp	914118	45378354	0	41902	0.178135	1.88965e-09	6.61803	Not Sig
MMP13	chr11	102942994	102955732	Amp	102944301	102974124	0.00595544	11431	-0.324384	6.13946e-09	-6.40665	Hypomethylation
HNF4A	chr20	44355800	44424379	Amp	44111002	44828213	0.0520814	68579	-0.207537	1.48519e-05	-4.7988	Hypomethylation
LGR5	chr12	71439797	71586310	Amp	71261505	71477632	0.0740026	37835	0.0102318	0.684573	0.534312	Not Sig
CNTN5	chr11	99020948	100358885	Amp	99047274	99052706	0.0731646	5432	0.0280095	0.393779	1.04318	Not Sig
CNTN5	chr11	99020948	100358885	Amp	100043767	100044284	0.0731646	517	0.0280095	0.393779	1.04318	Not Sig
CNTN5	chr11	99020948	100358885	Amp	99154707	99227417	0.0731646	72710	0.0280095	0.393779	1.04318	Not Sig
TMEM151A	chr11	66291893	66296664	Amp	66290717	66293762	0.0260105	1869	-0.0618383	0.0351383	-2.40007	Not Sig
TMEM151A	chr11	66291893	66296664	Amp	66296514	66378833	0.00595544	150	-0.0618383	0.0351383	-2.40007	Not Sig
DNAJB13	chr11	73951025	73970281	Amp	67305076	73968610	0	17585	-0.175566	0.000477922	-3.89591	Not Sig
SEC14L4	chr22	30488901	30505695	Amp	30201146	30552505	0.000270993	16794	-0.0946968	0.000314055	-4.01391	Not Sig
SERPINC1	chr1	173903799	173917327	Amp	149907993	189745259	0	13528	-0.175213	3.64269e-05	-4.5791	Not Sig
MMP1	chr11	102789918	102798160	Amp	102665445	102800667	0.00285428	8242	-0.309756	5.99707e-07	-5.50934	Hypomethylation
CXCL10	chr4	76021117	76023497	Amp	75822228	76042430	0.00247323	2380	0.123689	0.0349849	2.40195	Not Sig
CENPA	chr2	26786055	26794589	Amp	484222	27729539	0	8534	-0.00500984	0.000133152	-4.24833	Not Sig
LAMC2	chr1	183186263	183245127	Amp	149907993	189745259	0	58864	-0.163685	3.12224e-13	-8.05957	Not Sig
GPR158	chr10	25175000	25602229	Amp	25491278	25491298	0.000147723	20	0.0735362	0.0570854	2.18042	Not Sig
GPR158	chr10	25175000	25602229	Amp	25335916	25366886	0.000147723	30970	0.0735362	0.0570854	2.18042	Not Sig
GPR158	chr10	25175000	25602229	Amp	25372789	25379849	0.000657301	7060	0.0735362	0.0570854	2.18042	Not Sig
GPR158	chr10	25175000	25602229	Amp	25458167	25490206	0	32039	0.0735362	0.0570854	2.18042	Not Sig
GPR158	chr10	25175000	25602229	Amp	25381506	25453175	0.000147723	71669	0.0735362	0.0570854	2.18042	Not Sig
GPR158	chr10	25175000	25602229	Amp	25492457	28314535	0	109772	0.0735362	0.0570854	2.18042	Not Sig
GPR158	chr10	25175000	25602229	Amp	24848843	25335361	0	160361	0.0735362	0.0570854	2.18042	Not Sig
CAMK2N2	chr3	184259212	184261553	Amp	180901112	185245317	0	2341	-0.00200098	0.155585	-1.65965	Not Sig
PEX5L	chr3	179794957	180036937	Amp	175126620	180537339	0	241980	0.199	0.000145538	4.22501	Not Sig
MEX3A	chr1	156072012	156082465	Amp	149907993	189745259	0	10453	-0.00865077	0.360252	-1.1139	Not Sig
MELK	chr9	36572894	36677682	Amp	36576196	36728559	0.0024359	101486	-0.00433588	0.00413629	-3.22267	Not Sig
PYCR1	chr17	81932383	81937328	Amp	81215752	82263309	0	4945	0.00143288	0.794513	0.354162	Not Sig
RARRES1	chr3	158696891	158732457	Amp	156512044	159182304	0.0250506	35566	0.0382156	0.259537	1.34416	Not Sig
TMEM151B	chr6	44270449	44279444	Amp	44249917	44294288	0.0123112	8995	0.0213466	0.186999	1.55026	Not Sig
MATN3	chr2	19992051	20012668	Amp	484222	27729539	0	20617	-0.00617839	0.0206019	-2.62335	Not Sig
DNMT3B	chr20	32762384	32809356	Amp	31256170	34652599	0	46972	-0.00460714	8.11192e-05	-4.37601	Not Sig
BRIP1	chr17	61679138	61863528	Amp	59836174	76741926	0	184390	-0.00250173	0.0357161	-2.3928	Not Sig
MYCN	chr2	15940549	15947004	Amp	484222	27729539	0	6455	0.00960916	0.576526	0.71265	Not Sig
CCNE1	chr19	29811990	29824312	Amp	28838731	33259408	0	12322	-0.00273209	0.00361448	-3.26818	Not Sig
TDRD5	chr1	179591612	179691270	Amp	149907993	189745259	0	99658	-0.0190133	0.699152	-0.510764	Not Sig
CCNE2	chr8	94879769	94896678	Amp	79258005	144177593	0	16909	-0.00879762	0.0886134	-1.96568	Not Sig
MYLK4	chr6	2663636	2750922	Amp	2583936	3004299	4.99e-05	87286	-0.136719	0.00697384	-3.03908	Not Sig
TRIP13	chr5	892883	918120	Amp	914118	45378354	0	4002	-0.0068803	0.0485451	-2.25684	Not Sig
SLC3A1	chr2	44275479	44321494	Amp	44077918	44397405	0.00334225	46015	-0.147668	4.77042e-05	-4.51122	Not Sig
MICB	chr6	31498144	31511124	Amp	31238839	33056877	0.0606769	12980	-0.021064	0.0121966	-2.83083	Not Sig
PRR11	chr17	59155745	59206709	Amp	59100301	59471831	0.000416022	50964	-0.00318443	0.00586072	-3.1016	Not Sig
RAD51AP1	chr12	4538889	4560047	Amp	4405636	4827800	0.00562117	21158	0.00213034	0.281933	1.28857	Not Sig
KCNK12	chr2	47509289	47570985	Amp	47227066	48151371	3.31e-05	61696	0.239552	2.54096e-06	5.19963	Hypermethylation
ZNF432	chr19	52031377	52048838	Amp	51756318	52169168	0.0426582	17461	0.0506628	0.245145	1.38099	Not Sig
GALNT14	chr2	30910466	31138440	Amp	30855130	31587991	0.00012725	227974	-0.00474089	0.82378	-0.304122	Not Sig
PPM1N	chr19	45498442	45502513	Amp	45466318	45577017	0.0100148	4071	0.00551549	0.90108	0.174661	Not Sig
DDIAS	chr11	82901697	82958277	Amp	82863830	82935922	0.00285428	34225	-0.000937967	0.900504	-0.175976	Not Sig
DDIAS	chr11	82901697	82958277	Amp	82939703	83120640	0.00595544	18574	-0.000937967	0.900504	-0.175976	Not Sig
BIRC5	chr17	78214252	78225635	Amp	77568225	78305963	0	11383	-0.00318111	0.229188	-1.42419	Not Sig
CABP7	chr22	29720002	29731833	Amp	29656797	29732405	0.000270993	11831	0.0130676	0.71745	0.481556	Not Sig
SLC29A2	chr11	66362522	66372214	Amp	66296514	66378833	0.00595544	9692	-0.003056	0.00124196	-3.61401	Not Sig
ECT2	chr3	172750681	172821474	Amp	164126526	174883280	0	70793	0.00268943	0.710177	0.49286	Not Sig
RAB3IP	chr12	69738859	69823199	Amp	68349161	70386879	0	84340	-0.0023746	0.0139114	-2.77961	Not Sig
ECE2	chr3	184276021	184293031	Amp	180901112	185245317	0	17010	0.0637139	0.0153116	2.74238	Not Sig
ARHGEF39	chr9	35659342	35665195	Amp	35662883	35685892	0.0024359	2312	0.000179322	0.961911	0.0703458	Not Sig
E2F1	chr20	33675476	33686385	Amp	31256170	34652599	0	10909	-0.00825081	0.0133445	-2.79566	Not Sig
SPDYA	chr2	28810818	28850611	Amp	28747218	29412659	3.31e-05	39793	0.100615	0.086184	1.98017	Not Sig
SYT12	chr11	67006777	67050863	Amp	66970084	67286673	0	44086	-0.0166969	0.0512688	-2.23148	Not Sig
RRM2	chr2	10120697	10131418	Amp	484222	27729539	0	10721	-0.00147526	0.489423	-0.863998	Not Sig
SOX4	chr6	21593750	21598619	Amp	5005404	28555861	0	4869	-0.00600531	0.0251015	-2.54168	Not Sig
SLC5A6	chr2	27199586	27212268	Amp	484222	27729539	0	12682	-0.00723844	0.035406	-2.39679	Not Sig
EPCAM	chr2	47369310	47387020	Amp	47227066	48151371	3.31e-05	17710	-0.00217464	0.236512	-1.4049	Not Sig
LHX4	chr1	180230263	180278984	Amp	149907993	189745259	0	48721	-0.00141553	0.622681	-0.634631	Not Sig
CTHRC1	chr8	103371537	103382989	Amp	79258005	144177593	0	11452	0.0171933	0.498586	0.846821	Not Sig
ZNF525	chr19	53365704	53386590	Amp	52982807	53393380	0.00578927	20886	-0.00931623	0.531462	-0.788064	Not Sig
ZHX1-C8orf76	chr8	123226188	123267387	Amp	79258005	144177593	0	41199	.	.	.	.
KPNA2	chr17	68035734	68046854	Amp	59836174	76741926	0	11120	-0.00471355	0.047242	-2.26924	Not Sig
FAAP24	chr19	32972241	32978229	Amp	28838731	33259408	0	5988	-0.00596941	0.0203501	-2.62845	Not Sig
DHCR7	chr11	71434410	71448393	Amp	67305076	73968610	0	13983	0.00249486	0.171397	1.60236	Not Sig
SEC61G	chr7	54752252	54759974	Amp	54740630	54926731	0.000503786	7722	-0.00396198	0.00494599	-3.1607	Not Sig
CENPO	chr2	24793424	24822376	Amp	484222	27729539	0	28952	-0.00179242	0.0646333	-2.12179	Not Sig
LY6K	chr8	142700110	142705127	Amp	79258005	144177593	0	5017	-0.146386	5.48607e-05	-4.47619	Not Sig
ZSCAN16	chr6	28107688	28130082	Amp	5005404	28555861	0	22394	0.00510734	0.789299	0.362563	Not Sig
MUC1	chr1	155186122	155192868	Amp	149907993	189745259	0	6746	-0.170999	6.39286e-24	-11.4044	Not Sig
SOX9	chr17	72121019	72126416	Amp	59836174	76741926	0	5397	0.00937459	0.621156	0.637026	Not Sig
ATAD2	chr8	123319849	123396447	Amp	79258005	144177593	0	76598	0.0137829	0.0234625	2.56905	Not Sig
SQLE	chr8	124998504	125022283	Amp	79258005	144177593	0	23779	-0.00320862	0.00160636	-3.53387	Not Sig
PRSS16	chr6	27247700	27256620	Amp	5005404	28555861	0	8920	0.00696157	0.884731	0.203458	Not Sig
FASN	chr17	82078337	82098236	Amp	81215752	82263309	0	19899	-0.0010922	0.528536	-0.792883	Not Sig
FABP1	chr2	88122981	88128062	.	.	.	.	.	-0.0814097	0.0967267	-1.92093	Not Sig
CGB3	chr19	49022868	49024333	.	.	.	.	.	-0.218215	2.45602e-08	-6.14892	Hypomethylation
KRT81	chr12	52285912	52291534	.	.	.	.	.	0.188316	6.14516e-13	7.9538	Not Sig
IL37	chr2	112911164	112918882	.	.	.	.	.	-0.0436679	0.0735397	-2.05881	Not Sig
FOXA2	chr20	22581004	22585455	.	.	.	.	.	0.0704998	0.0724008	2.06697	Not Sig
HMGA2	chr12	65824482	65966291	.	.	.	.	.	-0.0200948	0.463508	-0.911376	Not Sig
ARX	chrX	25003693	25015965	.	.	.	.	.	-0.0192572	0.638252	-0.608403	Not Sig
IBSP	chr4	87799553	87812435	.	.	.	.	.	-0.0785749	0.154481	-1.66386	Not Sig
DGKK	chrX	50365408	50470825	.	.	.	.	.	-0.0175544	0.771129	-0.392273	Not Sig
B4GALNT2	chr17	49132768	49176840	.	.	.	.	.	0.0277193	0.514019	0.818508	Not Sig
MTNR1B	chr11	92969650	92982782	.	.	.	.	.	0.248681	9.4975e-14	8.24378	Hypermethylation
TTR	chr18	31557009	31598833	.	.	.	.	.	-0.300746	3.57886e-07	-5.61796	Hypomethylation
TRIML2	chr4	188091271	188109603	.	.	.	.	.	-0.121199	0.00177577	-3.5022	Not Sig
LHX1	chr17	36937474	36944612	.	.	.	.	.	0.120715	0.0516784	2.22761	Not Sig
A1CF	chr10	50806561	50859985	.	.	.	.	.	-0.302313	2.63826e-07	-5.68058	Hypomethylation
MAGEA11	chrX	149712059	149717268	.	.	.	.	.	.	.	.	.
IGF2BP1	chr17	48997384	49056145	.	.	.	.	.	0.10568	0.0049255	3.16228	Not Sig
KRTAP2-3	chr17	41059239	41060114	.	.	.	.	.	-0.109856	0.0128692	-2.80904	Not Sig
PAGE5	chrX	55220345	55224108	.	.	.	.	.	0.0592567	0.00426872	3.21142	Not Sig
SLC35D3	chr6	136922300	136925660	.	.	.	.	.	0.00286806	0.577777	0.71057	Not Sig
FOXB1	chr15	60004310	60007444	.	.	.	.	.	0.120338	0.015224	2.74482	Not Sig
IGF2BP3	chr7	23310208	23470491	.	.	.	.	.	0.0402984	0.35375	1.12706	Not Sig
EN2	chr7	155458128	155464831	.	.	.	.	.	0.0998689	0.0304737	2.46086	Not Sig
STRA8	chr7	135231978	135258492	.	.	.	.	.	-0.0889432	0.0031666	-3.31301	Not Sig
CASP14	chr19	15049479	15058293	.	.	.	.	.	-0.213281	0.000136344	-4.242	Hypomethylation
GCM1	chr6	53126960	53148841	.	.	.	.	.	-0.260575	0.000148313	-4.22029	Hypomethylation
ZPLD1	chr3	102099243	102477677	.	.	.	.	.	.	.	.	.
AMBP	chr9	114060126	114078300	.	.	.	.	.	-0.215205	1.74001e-06	-5.28221	Hypomethylation
SLC30A10	chr1	219910444	219928557	.	.	.	.	.	0.0548589	0.171021	1.60368	Not Sig
HEPHL1	chr11	94021353	94114208	.	.	.	.	.	-0.0935646	0.0633261	-2.1314	Not Sig
UNC13C	chr15	53978440	54628605	.	.	.	.	.	-0.210019	0.00152256	-3.55104	Hypomethylation
GRIN2D	chr19	48393667	48444931	.	.	.	.	.	-0.0205103	0.0613283	-2.14661	Not Sig
DDC	chr7	50458441	50565405	.	.	.	.	.	-0.206503	2.21621e-08	-6.16814	Hypomethylation
CST6	chr11	66012007	66013505	.	.	.	.	.	-0.0508211	0.00413001	-3.2232	Not Sig
IGDCC3	chr15	65327126	65378002	.	.	.	.	.	0.00140615	0.895621	0.184921	Not Sig
LRP2	chr2	169127108	169362534	.	.	.	.	.	0.01823	0.403869	1.02288	Not Sig
MYPN	chr10	68106122	68211703	.	.	.	.	.	0.00242795	0.8727	0.223975	Not Sig
RDM1	chr17	35918079	35930773	.	.	.	.	.	-0.011355	0.0606955	-2.15147	Not Sig
PIWIL1	chr12	130337886	130372637	.	.	.	.	.	0.0538132	0.0550134	2.19856	Not Sig
PDZK1	chr1	145670984	145707368	.	.	.	.	.	-0.185607	0.000301322	-4.02525	Not Sig
USH2A	chr1	215622890	216423448	.	.	.	.	.	-0.244072	3.34513e-05	-4.59993	Hypomethylation
FOXL2	chr3	138944223	138947137	.	.	.	.	.	0.0361257	0.282502	1.28702	Not Sig
LYPD8	chr1	248739414	248755759	.	.	.	.	.	-0.225698	9.73437e-07	-5.40885	Hypomethylation
SHISA2	chr13	26044596	26052016	.	.	.	.	.	0.0745291	0.0590263	2.16454	Not Sig
DLX2	chr2	172099437	172102900	.	.	.	.	.	0.0216316	0.524916	0.79974	Not Sig
UGT2B4	chr4	69480164	69495905	.	.	.	.	.	-0.035814	0.0199728	-2.63634	Not Sig
NRCAM	chr7	108147648	108456436	.	.	.	.	.	-0.0131629	0.61404	-0.648846	Not Sig
HOXC8	chr12	54008984	54012769	.	.	.	.	.	0.0152056	0.60976	0.65626	Not Sig
ZNF730	chr19	23117024	23147221	.	.	.	.	.	.	.	.	.
CSF2	chr5	132073788	132076170	.	.	.	.	.	-0.17758	2.52533e-08	-6.14308	Not Sig
SLC12A3	chr16	56865206	56915850	.	.	.	.	.	-0.139193	0.0118387	-2.84247	Not Sig
NTS	chr12	85874294	85882992	.	.	.	.	.	0.0219428	0.527096	0.795506	Not Sig
NKX2-8	chr14	36580003	36582614	.	.	.	.	.	0.0898806	0.0389368	2.35545	Not Sig
OLR1	chr12	10158300	10172132	.	.	.	.	.	-0.354005	4.0918e-10	-6.8882	Hypomethylation
CLEC12B	chr12	10010626	10018796	.	.	.	.	.	-0.230455	9.32245e-24	-11.3554	Hypomethylation
TSPEAR	chr21	44497892	44711572	.	.	.	.	.	-0.00993366	0.362974	-1.10829	Not Sig
DKK2	chr4	106921801	107036313	.	.	.	.	.	0.16625	0.000554826	3.85255	Not Sig
SLC28A3	chr9	84275456	84340758	.	.	.	.	.	.	.	.	.
SMKR1	chr7	129502530	129512918	.	.	.	.	.	.	.	.	.
SBK1	chr16	28292524	28323849	.	.	.	.	.	0.01493	0.0639758	2.12651	Not Sig
INHBA	chr7	41685113	41703090	.	.	.	.	.	-0.384354	5.17159e-10	-6.84713	Hypomethylation
CTSE	chr1	206009263	206023895	.	.	.	.	.	-0.203181	0.0022097	-3.43117	Hypomethylation
DNAAF3	chr19	55158662	55166651	.	.	.	.	.	0.035755	0.227329	1.42933	Not Sig
LHX2	chr9	124011767	124033301	.	.	.	.	.	0.114625	0.0572741	2.17891	Not Sig
POLQ	chr3	121431430	121545988	.	.	.	.	.	-0.00239598	0.014928	-2.75246	Not Sig
SGO1	chr3	20160592	20186191	.	.	.	.	.	0.00168875	0.211075	1.47591	Not Sig
ERVMER34-1	chr4	52742552	52751425	.	.	.	.	.	.	.	.	.
MEST	chr7	130486170	130506292	.	.	.	.	.	0.102473	0.000377198	3.96229	Not Sig
RNFT2	chr12	116738314	116853631	.	.	.	.	.	-0.00115784	0.114633	-1.8313	Not Sig
STRIP2	chr7	129434431	129488399	.	.	.	.	.	-0.00492378	0.0316976	-2.44328	Not Sig
E2F7	chr12	77021250	77065569	.	.	.	.	.	-0.000523022	0.735665	-0.451951	Not Sig
FAM111B	chr11	59107236	59127412	.	.	.	.	.	-0.0470018	1.58315e-05	-4.78374	Not Sig
SAPCD2	chr9	137062126	137070557	.	.	.	.	.	-0.00520303	3.47851e-05	-4.59048	Not Sig
AURKA	chr20	56369389	56392337	.	.	.	.	.	-0.00111265	0.221273	-1.4468	Not Sig
GNG4	chr1	235547686	235650754	.	.	.	.	.	0.224472	1.8271e-08	6.20411	Hypermethylation
EXO1	chr1	241848203	241889939	.	.	.	.	.	-0.00249974	0.0109999	-2.87097	Not Sig
HSD17B1	chr17	42552922	42555214	.	.	.	.	.	.	.	.	.
ASPM	chr1	197084126	197146669	.	.	.	.	.	-0.000694363	0.781363	-0.3751	Not Sig
MMP9	chr20	46008907	46016561	.	.	.	.	.	-0.0614509	0.00705039	-3.03543	Not Sig
KIF4A	chrX	70290103	70420886	.	.	.	.	.	-0.117247	0.00689705	-3.0434	Not Sig
RTN4R	chr22	20241414	20268318	.	.	.	.	.	0.000436893	0.96891	0.0581633	Not Sig
ORC1	chr1	52372828	52404423	.	.	.	.	.	-0.00101601	0.0634256	-2.13061	Not Sig
KIF2C	chr1	44739836	44767767	.	.	.	.	.	-0.00176649	0.0606833	-2.15162	Not Sig
FAM227A	chr22	38582168	38656303	.	.	.	.	.	-0.000208676	0.77177	-0.391338	Not Sig
FRMD5	chr15	43870763	44195271	.	.	.	.	.	-0.00925324	0.011311	-2.86036	Not Sig
CDC45	chr22	19479919	19520608	.	.	.	.	.	-0.000557025	0.573575	-0.717459	Not Sig
KIF14	chr1	200551499	200620751	.	.	.	.	.	-0.00170323	0.570577	-0.722566	Not Sig
SYT16	chr14	61812702	62112550	.	.	.	.	.	-0.161134	0.0223867	-2.58861	Not Sig
FANCA	chr16	89737548	89816647	.	.	.	.	.	-0.00342494	0.77221	-0.390495	Not Sig
MYB	chr6	135181327	135219173	.	.	.	.	.	0.0307166	0.0010267	3.67216	Not Sig
ZNF726	chr19	23914885	23934484	.	.	.	.	.	.	.	.	.
KSR2	chr12	117453011	117968990	.	.	.	.	.	0.0406596	0.0492979	2.24995	Not Sig
SIM2	chr21	36699114	36749917	.	.	.	.	.	-0.00294013	0.932658	-0.122232	Not Sig
CENPI	chrX	101098203	101166126	.	.	.	.	.	-0.146416	0.000214716	-4.11942	Not Sig
TOP2A	chr17	40388524	40417896	.	.	.	.	.	-0.00386062	0.0192478	-2.65115	Not Sig
ZNF732	chr4	270674	305474	.	.	.	.	.	-0.0940362	0.000793759	-3.74832	Not Sig
CDT1	chr16	88803788	88809258	.	.	.	.	.	-0.00778363	0.000846731	-3.72943	Not Sig
CALCR	chr7	93424485	93574724	.	.	.	.	.	0.0485942	0.103906	1.88492	Not Sig
SLC23A1	chr5	139367195	139383297	.	.	.	.	.	-0.183154	2.49771e-08	-6.14532	Not Sig
GINS1	chr20	25407672	25448563	.	.	.	.	.	-0.000885113	0.0662	-2.11056	Not Sig
DLGAP5	chr14	55148134	55191585	.	.	.	.	.	-0.0284786	0.00010104	-4.32024	Not Sig
ASF1B	chr19	14119511	14136589	.	.	.	.	.	-0.00201941	0.17903	-1.57599	Not Sig
CBX2	chr17	79778147	79787983	.	.	.	.	.	0.000661662	0.798772	0.347099	Not Sig
IL12RB2	chr1	67307872	67398724	.	.	.	.	.	-0.0641139	0.13128	-1.75712	Not Sig
PRSS8	chr16	31131432	31135727	.	.	.	.	.	-0.0906956	0.000399598	-3.94638	Not Sig
HCAR1	chr12	122726075	122730844	.	.	.	.	.	-0.251381	1.60643e-09	-6.64722	Hypomethylation
GALNT6	chr12	51351251	51391406	.	.	.	.	.	-0.0062788	0.445737	-0.944352	Not Sig
LCTL	chr15	66547178	66565497	.	.	.	.	.	-0.0535781	0.0540175	-2.20725	Not Sig
UNC13A	chr19	17601335	17688354	.	.	.	.	.	0.0301953	0.363601	1.10657	Not Sig
IFI27	chr14	94110731	94116695	.	.	.	.	.	-0.208732	8.32771e-06	-4.93256	Hypomethylation
DNAH3	chr16	20933110	21159441	.	.	.	.	.	-0.00488534	0.800841	-0.343317	Not Sig
PCLAF	chr15	64364303	64381441	.	.	.	.	.	-0.00104675	0.934931	-0.118476	Not Sig
ZNF117	chr7	64971771	64991036	.	.	.	.	.	.	.	.	.
KIF23	chr15	69414292	69448132	.	.	.	.	.	-0.00673066	1.4479e-06	-5.32212	Not Sig
APLN	chrX	129645258	129654956	.	.	.	.	.	-0.0999228	0.00971967	-2.91719	Not Sig
TICRR	chr15	89575468	89628023	.	.	.	.	.	-0.00631482	0.00075473	-3.76374	Not Sig
HMGB3	chrX	150983334	150990771	.	.	.	.	.	-0.109092	0.012585	-2.81833	Not Sig
PHACTR3	chr20	59604539	59847711	.	.	.	.	.	0.0704863	0.024298	2.55461	Not Sig
HIC2	chr22	21417370	21451463	.	.	.	.	.	-0.102331	0.00812527	-2.98382	Not Sig
BUB1	chr2	110637527	110678063	.	.	.	.	.	-0.00628349	0.0179538	-2.67831	Not Sig
WNT2	chr7	117275450	117323058	.	.	.	.	.	0.197669	7.56235e-05	4.39291	Not Sig
CACNA1A	chr19	13206441	13506479	.	.	.	.	.	0.0841461	0.0113651	2.85846	Not Sig
CDCA7	chr2	173354819	173368904	.	.	.	.	.	0.00329717	0.818807	0.312271	Not Sig
BRCA2	chr13	32315085	32400268	.	.	.	.	.	-0.00349859	0.447729	-0.940692	Not Sig
DTL	chr1	212035747	212105013	.	.	.	.	.	-0.00746079	0.00275103	-3.35984	Not Sig
CDCA5	chr11	65077452	65084040	.	.	.	.	.	-0.0016702	0.0301104	-2.46579	Not Sig
ARHGEF38	chr4	105552619	105680914	.	.	.	.	.	-0.204102	0.00115997	-3.63479	Hypomethylation
CIP2A	chr3	108549863	108589438	.	.	.	.	.	0.000338029	0.900741	0.175464	Not Sig
CENPF	chr1	214603194	214664571	.	.	.	.	.	-0.00272605	0.0539253	-2.20807	Not Sig
PILRB	chr7	100352175	100367733	.	.	.	.	.	-0.00448081	0.0227541	-2.58176	Not Sig
CEMIP	chr15	80779342	80951776	.	.	.	.	.	-0.00163885	0.896436	-0.183596	Not Sig
ZNF737	chr19	20537991	20565781	.	.	.	.	.	0.0561674	0.00143989	3.56808	Not Sig
SIX4	chr14	60709538	60724351	.	.	.	.	.	-0.000317452	0.806415	-0.333377	Not Sig
SLFN13	chr17	35435095	35448766	.	.	.	.	.	0.0650002	0.0884968	1.96643	Not Sig
VGLL1	chrX	136532214	136556799	.	.	.	.	.	-0.386744	1.70416e-09	-6.63664	Hypomethylation
CHAF1B	chr21	36385391	36419015	.	.	.	.	.	-0.015662	0.104768	-1.88021	Not Sig
ZYG11A	chr1	52842759	52894998	.	.	.	.	.	-0.228117	2.71724e-06	-5.18503	Hypomethylation
MCM2	chr3	127598410	127622436	.	.	.	.	.	-0.00467026	0.0140381	-2.77598	Not Sig
KNTC1	chr12	122527248	122626396	.	.	.	.	.	-0.010652	0.000229081	-4.1019	Not Sig
LIPC	chr15	58410568	58568873	.	.	.	.	.	-0.295607	6.19349e-05	-4.44474	Hypomethylation
BMP8B	chr1	39757181	39788865	.	.	.	.	.	0.0032211	0.766873	0.399246	Not Sig
GINS4	chr8	41529260	41545030	.	.	.	.	.	-0.00162402	0.0359472	-2.38991	Not Sig
WDHD1	chr14	54938948	55027099	.	.	.	.	.	-0.016646	0.00184738	-3.48945	Not Sig
DNAH14	chr1	224929674	225399286	.	.	.	.	.	0.00944463	0.717458	0.481433	Not Sig
SLC19A1	chr21	45498200	45544411	.	.	.	.	.	-0.00499522	0.3324	-1.17265	Not Sig
AGMAT	chr1	15571698	15585051	.	.	.	.	.	-0.146948	4.11922e-10	-6.88671	Not Sig
C12orf75	chr12	105330690	105371518	.	.	.	.	.	-0.00541328	0.691842	-0.522603	Not Sig
SLC28A1	chr15	84884661	84945798	.	.	.	.	.	-0.158609	0.00124197	-3.61395	Not Sig
RTKN2	chr10	62193085	62268844	.	.	.	.	.	-0.00515522	0.116733	-1.82121	Not Sig
PACSIN1	chr6	34466060	34535221	.	.	.	.	.	0.00286912	0.837602	0.281814	Not Sig
TRIB3	chr20	380759	397559	.	.	.	.	.	-0.0063613	0.000465899	-3.90302	Not Sig
PHEX	chrX	22032324	22251310	.	.	.	.	.	-0.0149519	0.846578	-0.266666	Not Sig
MME	chr3	155024123	155180849	.	.	.	.	.	0.00415137	0.735535	0.452161	Not Sig
ZFP69B	chr1	40450106	40463718	.	.	.	.	.	0.0186928	0.374614	1.08335	Not Sig
ZGRF1	chr4	112539338	112636909	.	.	.	.	.	-0.00024787	0.917308	-0.148149	Not Sig
CIT	chr12	119685790	119877320	.	.	.	.	.	-0.00379255	2.23155e-05	-4.70022	Not Sig
RASGEF1A	chr10	43194534	43267065	.	.	.	.	.	-0.014932	0.685514	-0.532958	Not Sig
PRC1	chr15	90966039	90994535	.	.	.	.	.	-0.000763847	0.241616	-1.39041	Not Sig
GPR137C	chr14	52552835	52637713	.	.	.	.	.	-0.0258516	0.000361506	-3.97462	Not Sig
FANCI	chr15	89243978	89317131	.	.	.	.	.	-0.00101939	0.571186	-0.721521	Not Sig
ZDHHC23	chr3	113948012	113963373	.	.	.	.	.	-0.00284015	0.00205294	-3.45504	Not Sig
IGFBP3	chr7	45912244	45921272	.	.	.	.	.	-0.0120243	0.257337	-1.35002	Not Sig
LMNB1	chr5	126777135	126837020	.	.	.	.	.	-0.00323827	0.00362784	-3.26692	Not Sig
SHCBP1	chr16	46578590	46621379	.	.	.	.	.	0.000258451	0.945238	0.0997327	Not Sig
LRRIQ3	chr1	74026014	74198176	.	.	.	.	.	-2.92129e-05	0.992974	-0.0127174	Not Sig
CHEK1	chr11	125625973	125676255	.	.	.	.	.	-0.00813086	0.767085	-0.398936	Not Sig
ZNF682	chr19	20004417	20039505	.	.	.	.	.	-0.00278384	0.849451	-0.261629	Not Sig
DONSON	chr21	33577550	33588684	.	.	.	.	.	-0.00105853	0.146522	-1.69457	Not Sig
ZNF93	chr19	19900945	19935575	.	.	.	.	.	-0.0034406	0.797559	-0.349168	Not Sig
RMI2	chr16	11345458	11351760	.	.	.	.	.	-0.00187777	0.0157019	-2.73223	Not Sig
CBX8	chr17	79792131	79797077	.	.	.	.	.	-0.00182524	0.0172806	-2.69394	Not Sig
FBXO2	chr1	11648386	11654429	.	.	.	.	.	-0.00170625	0.469597	-0.89989	Not Sig
RAB19	chr7	140404057	140427974	.	.	.	.	.	-0.150888	1.15734e-11	-7.48634	Not Sig
ZBTB8B	chr1	32465071	32496686	.	.	.	.	.	0.0057	0.783364	0.371945	Not Sig
MFAP2	chr1	16974501	16980620	.	.	.	.	.	-0.058874	0.0119986	-2.83683	Not Sig
ZNF681	chr19	23739194	23758891	.	.	.	.	.	0.000229955	0.988906	0.0217689	Not Sig
ZNF92	chr7	65373854	65401136	.	.	.	.	.	-0.013237	0.30811	-1.22719	Not Sig
TIMELESS	chr12	56416362	56449426	.	.	.	.	.	0.00095302	0.830315	0.293294	Not Sig
TFEC	chr7	115935155	116030813	.	.	.	.	.	-0.156109	4.84792e-09	-6.44883	Not Sig
ZNF257	chr19	22052483	22091480	.	.	.	.	.	0.0675221	0.0193378	2.64901	Not Sig
CDH24	chr14	23047066	23057520	.	.	.	.	.	-0.0309583	1.01196e-10	-7.12668	Not Sig
MCM4	chr8	47960935	47978160	.	.	.	.	.	-0.00227525	0.0355053	-2.39545	Not Sig
SASS6	chr1	100083569	100132930	.	.	.	.	.	-0.00499425	0.0175069	-2.68846	Not Sig
AGRN	chr1	1020119	1056116	.	.	.	.	.	-0.00428849	0.086884	-1.97605	Not Sig
PRIM1	chr12	56731579	56752323	.	.	.	.	.	-0.000791626	0.806317	-0.333705	Not Sig
ZNF107	chr7	64666132	64711577	.	.	.	.	.	0.00476281	0.55837	0.74282	Not Sig
CDCA4	chr14	105009572	105021083	.	.	.	.	.	-0.0205671	4.56224e-07	-5.56806	Not Sig
NCAPG2	chr7	158631168	158704804	.	.	.	.	.	-0.00104589	0.486187	-0.870071	Not Sig
BCL2L2-PABPN1	chr14	23306834	23325369	.	.	.	.	.	.	.	.	.

## Sheet: S9 Table
Supplementary Table S9. Details of immune cell infiltration analysis obtained from CIBERSORT algorithm.
mean of infiltrating percentage of 22 immune cells ± SD
Immune Cell	Cancer (n=182) mean %	± SD %
T cells CD4 memory resting	29.3691	34.9451
Plasma cells	18.144	7.83357
T cells follicular helper	12.0761	9.30581
B cells memory	10.5017	9.13875
B cells naive	9.77223	9.09247
Monocytes	7.45636	9.55808
T cells regulatory (Tregs)	6.58252	9.37284
NK cells activated	5.50626	9.05218
T cells CD8	3.66654	5.74586
Dendritic cells activated	3.34062	4.5409
Eosinophils	3.28424	5.98241
Macrophages M0	3.09737	5.18557
Macrophages M2	2.66301	3.22305
T cells gamma delta	2.65878	6.24691
Macrophages M1	2.43222	5.7872
Mast cells resting	1.74751	1.95852
T cells CD4 naive	1.08795	1.60929
Neutrophils	1.06236	3.14741
T cells CD4 memory activated	0.839301	1.6452
NK cells resting	0.801081	1.85956
Dendritic cells resting	0.254513	1.06314
Mast cells activated	0.0884061	0.660518
